# Supplementary material
Source: publisher figshare collection journal article supplement (https://gsapubs.figshare.com/ndownloader/files/38162985)
Supplement: Supplementary file 1 [file 38162985]

## Sheet: session1
name	timestamp	179Hf/177Hf - Measured' mean	179Hf/177Hf - Measured' SE	Beta 179Hf/177Hf' mean	Beta 179Hf/177Hf' SE	171Yb/173Yb - Measured' mean	171Yb/173Yb - Measured' SE	Beta 171Yb/173Yb' mean	Beta 171Yb/173Yb' SE	180W/180Hf' mean	180W/180Hf' SE	180Ta/180Hf' mean	180Ta/180Hf' SE	176Lu/177Hf' mean	176Lu/177Hf' SE	176Yb/177Hf' mean	176Yb/177Hf' SE	174Yb/174Hf' mean	174Yb/174Hf' SE	174Hf/177Hf Corrected' mean	174Hf/177Hf Corrected' SE	176Hf/177Hf Corrected' mean	176Hf/177Hf Corrected' SE	178Hf/177Hf Corrected' mean	178Hf/177Hf Corrected' SE	180Hf/177Hf Corrected' mean	180Hf/177Hf Corrected' SE	Total Hf ion beam (V)' mean	Total Hf ion beam (V)' SE	Yb173 ion beam (V)' mean	Yb173 ion beam (V)' SE	Total Lu ion beam (V)' mean	Total Lu ion beam (V)' SE	Total Ta ion beam (V)' mean	Total Ta ion beam (V)' SE	Total W ion beam (V)' mean	Total W ion beam (V)' SE	Baseline 171Yb' mean	Baseline 171Yb' SE	Baseline 172Yb' mean	Baseline 172Yb' SE	Baseline 173Yb' mean	Baseline 173Yb' SE	Baseline 174Yb' mean	Baseline 174Yb' SE	Baseline 175Lu' mean	Baseline 175Lu' SE	Baseline 176Hf' mean	Baseline 176Hf' SE
1SMBT4_001_3513	2019-06-03 13:22:52	0.744886	4.04e-05	-1.48992	0.00483	0.869773	0.000692	1.02697	0.000823	1.64861e-07	4.15e-08	1.46764e-08	1.23e-09	0.00120966	2.33e-05	0.0390734	0.0008	11.9129	0.267	0.00853068	6.06e-05	0.282075	3.73e-05	1.4667	6.3e-05	1.88697	0.000118	2.51129	0.0162	0.0212799	0.000315	0.0205576	0.000277	0.000108687	8.81e-06	0.000121214	3.07e-05	-0.000925729	5.76e-12	-0.00315439	0	-0.00425533	0	-0.00601525	3.68e-11	-0.00303346	0	-0.0048689	2.92e-11
1SMBT4_002_3514	2019-06-03 13:23:55	0.744778	3.68e-05	-1.477	0.00439	0.869449	0.000766	1.02751	0.000906	-5.83055e-08	5.04e-08	2.36117e-07	5.06e-09	0.00133068	1.21e-05	0.039253	0.000501	11.573	0.161	0.00865878	5.25e-05	0.282174	3.26e-05	1.46687	6.68e-05	1.88714	0.000115	2.22375	0.0209	0.0195929	0.000411	0.0203696	0.000305	0.00147109	3.96e-05	-4.07022e-05	3.31e-05	-0.000921892	0	-0.00312261	1.4e-11	-0.00423151	2.91e-11	-0.00599017	0	-0.00302339	1.79e-11	-0.0048872	3.57e-11
1SMBT4_003_3517	2019-06-03 13:24:49	0.745012	3.73e-05	-1.50492	0.00445	0.866601	0.00152	1.03024	0.00182	1.63558e-08	4.43e-08	2.64036e-08	1.4e-09	0.000682118	7.87e-07	0.0165654	5.91e-05	4.8661	0.041	0.00870598	4.81e-05	0.282091	3.17e-05	1.46675	6.1e-05	1.88644	0.00011	2.23373	0.0061	0.00836522	5.45e-05	0.0106847	4.12e-05	0.00017918	9.18e-06	1.50314e-05	2.96e-05	-0.00090782	0	-0.00314416	1.96e-11	-0.00425147	0	-0.00602665	0	-0.00303467	0	-0.00489041	3.05e-11
1SMBT4_004_3518	2019-06-03 13:25:49	0.74508	3.73e-05	-1.513	0.00445	0.869741	0.000319	1.02695	0.000374	1.71067e-07	4.45e-08	3.13885e-07	4.51e-09	0.00279222	4.37e-05	0.0851911	0.00155	25.2721	0.474	0.00855487	4.86e-05	0.282154	2.99e-05	1.46668	6.36e-05	1.8865	0.000109	2.39975	0.0131	0.0459274	0.00107	0.0468554	0.000967	0.00223841	3.14e-05	0.000136905	3.34e-05	-0.000932439	0	-0.0031533	0	-0.00425506	1.3e-11	-0.00599833	3.2e-11	-0.00302704	0	-0.00486174	1.58e-11
1SMBT4_005_3519	2019-06-03 13:27:12	0.744998	4.12e-05	-1.50321	0.00491	0.870224	0.000896	1.02667	0.00105	-1.63443e-08	5.35e-08	5.50375e-08	1.79e-09	0.00113349	4.9e-06	0.0317106	0.00016	9.50362	0.112	0.00878745	6.36e-05	0.282091	4.38e-05	1.46661	7.61e-05	1.88666	0.00013	1.9445	0.0139	0.0134012	0.000103	0.0149196	9.65e-05	0.000307519	1.02e-05	5.40609e-06	3.19e-05	-0.000923971	5.79e-12	-0.00313435	0	-0.00424823	2.48e-11	-0.00603871	0	-0.00302848	0	-0.00487688	0
1SMBT4_006_3520	2019-06-03 13:28:21	0.744958	4.72e-05	-1.49846	0.00562	0.869739	0.00178	1.02769	0.00208	1.49775e-07	7.07e-08	7.74921e-08	1.74e-09	0.00066624	1.51e-06	0.0188222	7.78e-05	5.65542	0.0558	0.00850367	6.65e-05	0.282448	4.29e-05	1.46658	8.05e-05	1.88645	0.000143	1.66527	0.00844	0.00710356	6.07e-05	0.0078606	4.6e-05	0.00037821	8.12e-06	7.57597e-05	3.56e-05	-0.00094689	0	-0.00311204	0	-0.00426484	0	-0.0059917	2.54e-11	-0.00301826	0	-0.00486558	2.44e-11
1SMBT4_007_3521	2019-06-03 13:29:17	0.744943	3.31e-05	-1.49667	0.00394	0.871279	0.00165	1.02549	0.00192	9.83429e-08	4.71e-08	4.77993e-08	1.57e-09	0.000620956	8.23e-06	0.0156206	0.000216	4.62664	0.0681	0.00852257	4.63e-05	0.282	3.22e-05	1.4667	6.29e-05	1.88683	0.000103	2.29718	0.0184	0.00825435	0.000103	0.0102878	0.000139	0.000309132	1.11e-05	6.90071e-05	3.21e-05	-0.000940737	0	-0.00315201	9.4e-12	-0.00426354	2.91e-11	-0.00601953	3.49e-11	-0.0030305	0	-0.00489264	2.78e-11
1SMBT4_008_3524	2019-06-03 13:30:23	0.744941	4.98e-05	-1.49638	0.00594	0.870206	0.000888	1.0262	0.00102	6.27908e-08	6.9e-08	6.60658e-08	2.04e-09	0.00221644	8.57e-05	0.0673254	0.00279	19.8116	0.854	0.00851811	7.58e-05	0.2826	4.9e-05	1.46637	8.23e-05	1.88651	0.000148	1.60063	0.00802	0.0263648	0.0011	0.0268538	0.00106	0.000305994	9.47e-06	1.46061e-05	3.31e-05	-0.000942934	0	-0.00312567	0	-0.00424075	0	-0.00600424	1.83e-11	-0.00303632	9.7e-12	-0.00487606	0
1SMBT4_009_3525	2019-06-03 13:31:15	0.744718	5.7e-05	-1.46983	0.00681	0.863308	0.00127	1.0335	0.00151	2.01275e-07	8.3e-08	1.10855e-07	2.83e-09	0.00133195	4.99e-06	0.0401321	0.000138	12.0584	0.147	0.00858965	8.74e-05	0.282012	5.22e-05	1.46672	9.49e-05	1.88703	0.000192	1.30668	0.00753	0.0118284	8.69e-05	0.0121938	6.19e-05	0.000411982	1.23e-05	7.58377e-05	3.24e-05	-0.00090356	5.48e-12	-0.00313619	0	-0.00425015	0	-0.00599432	4.44e-11	-0.00304451	0	-0.00486811	2.72e-11
1SMBT4_010_3526	2019-06-03 13:32:10	0.744926	3.51e-05	-1.49461	0.00418	0.871914	0.00114	1.02486	0.00135	1.26609e-08	4.99e-08	5.27949e-08	1.37e-09	0.00091011	6.82e-06	0.0248688	0.0003	7.41639	0.108	0.00866923	5.05e-05	0.281995	3.4e-05	1.46669	7.48e-05	1.88673	0.00012	2.2706	0.0159	0.0127932	0.000224	0.0144584	0.000176	0.000349856	9.5e-06	1.08099e-05	3.34e-05	-0.000932362	0	-0.00315023	0	-0.00424778	2.1e-11	-0.00601032	1.7e-11	-0.00302104	1.33e-11	-0.0048651	1.29e-11
1SMBT4_011_3527	2019-06-03 13:32:53	0.744865	3.43e-05	-1.4874	0.00409	0.869796	0.000271	1.02693	0.00032	3.51015e-07	4.42e-08	1.46599e-07	1.32e-09	0.00267073	1.62e-05	0.0905022	0.000608	26.5529	0.234	0.00854206	4.77e-05	0.282065	3.54e-05	1.46663	5.98e-05	1.88668	0.000113	2.47948	0.0199	0.0522224	0.000401	0.0478643	0.000322	0.00105338	9.53e-06	0.000266716	3.18e-05	-0.000938848	0	-0.0031616	0	-0.00425857	0	-0.00603803	3.04e-11	-0.00304628	1.14e-11	-0.00486963	0
1SMBT4_012_3528	2019-06-03 13:33:40	0.744909	4.39e-05	-1.4926	0.00524	0.868449	0.00157	1.0288	0.00185	1.28424e-07	5.75e-08	3.90563e-08	1.4e-09	0.000713396	1.53e-06	0.0200044	3.07e-05	5.81506	0.0455	0.00871177	5.6e-05	0.282534	3.85e-05	1.46674	7.71e-05	1.88709	0.00014	1.91287	0.0157	0.00858266	6.52e-05	0.00952481	6.19e-05	0.000217251	8.13e-06	9.96619e-05	3.27e-05	-0.000923034	5.06e-12	-0.00314537	8.97e-12	-0.00425274	0	-0.00601276	0	-0.0030246	0	-0.0048784	0
1SMBT4_013_3531	2019-06-03 13:35:15	0.745234	0.000168	-1.53091	0.0201	0.872334	0.00799	1.02645	0.00995	-1.05146e-06	3.11e-07	7.20425e-08	8.61e-09	0.000845508	5.51e-06	0.0216079	0.000173	7.94383	0.42	0.00844356	0.000343	0.281604	0.0002	1.46649	0.000261	1.88579	0.000537	0.364231	0.00386	0.00176145	3.1e-05	0.00212442	3.23e-05	7.43799e-05	8.94e-06	-9.3356e-05	3.23e-05	-0.000944468	6.45e-12	-0.00313739	0	-0.00424608	2.23e-11	-0.00601874	0	-0.00304938	0	-0.00486316	0
1SMBT4_015_3532	2019-06-03 13:36:07	0.744494	0.000192	-1.44568	0.023	0.874377	0.00588	1.02352	0.00685	2.94751e-07	3.43e-07	2.66887e-08	1.04e-08	0.00144194	5.06e-06	0.0407672	0.000214	10.7116	0.942	0.00891434	0.00042	0.282156	0.000231	1.46673	0.000393	1.8867	0.000641	0.282987	0.00347	0.00261472	4.21e-05	0.00287564	3.68e-05	1.74606e-05	8.33e-06	2.57673e-05	2.81e-05	-0.000939637	5.9e-12	-0.00312914	2.48e-11	-0.00424556	2.17e-11	-0.00600619	0	-0.00302996	0	-0.00488009	1.22e-11
1SMBT4_016_3533	2019-06-03 13:37:05	0.744967	3.73e-05	-1.49951	0.00445	0.870444	0.00051	1.02622	0.000601	1.66028e-07	4.28e-08	8.69854e-08	1.45e-09	0.00178975	1.65e-05	0.0528502	0.00069	15.4001	0.224	0.00869496	5.24e-05	0.282	3.83e-05	1.46674	6.45e-05	1.88674	0.000118	2.44975	0.0233	0.0300992	0.000672	0.031511	0.000585	0.00060665	1.4e-05	0.000120565	3.1e-05	-0.000921332	2.59e-12	-0.00313444	0	-0.0042405	0	-0.00601648	0	-0.0030482	1.82e-11	-0.00486347	0
1SMST9_001_3412	2019-06-03 11:20:35	0.744995	4.47e-05	-1.50286	0.00533	0.869494	0.00134	1.02766	0.00158	8.08477e-08	6.65e-08	1.8307e-07	2.14e-09	0.000932878	1.7e-06	0.028852	0.00015	8.46811	0.0923	0.00872738	7.65e-05	0.282411	4.77e-05	1.46667	7.64e-05	1.88661	0.00015	1.61692	0.00372	0.0106036	7.57e-05	0.0106341	4.01e-05	0.000861391	1.09e-05	3.45738e-05	3.2e-05	-0.000944318	0	-0.00316751	1.99e-11	-0.00425225	0	-0.00602587	0	-0.00304812	0	-0.00488698	4.04e-11
1SMST9_002_3415	2019-06-03 11:22:08	0.745136	3.93e-05	-1.51974	0.00468	0.866884	0.00134	1.03097	0.00159	1.82228e-08	5.63e-08	1.50218e-07	2.18e-09	0.000748359	4.95e-06	0.0226027	0.000187	6.69108	0.0776	0.00862318	5.51e-05	0.282475	4.22e-05	1.46652	6.86e-05	1.88605	0.000128	1.95326	0.022	0.009926	0.00018	0.0102058	0.000161	0.000849102	1.87e-05	1.03402e-05	3.2e-05	-0.000952684	4.18e-12	-0.00318808	2.11e-11	-0.00428925	3.06e-12	-0.00606064	0	-0.00306877	4.49e-12	-0.00490987	1.47e-11
1SMST9_003_3416	2019-06-03 11:23:30	0.744942	6.03e-05	-1.49648	0.00719	0.87044	0.00174	1.02591	0.00208	7.6795e-08	9.57e-08	9.75892e-08	2.55e-09	0.00101457	2.25e-06	0.031374	0.000127	9.33252	0.124	0.00876134	9.72e-05	0.282624	6.24e-05	1.46661	0.0001	1.88669	0.000192	1.11252	0.0044	0.00794799	6.35e-05	0.00795746	4.39e-05	0.000318094	8.56e-06	3.06161e-05	3.21e-05	-0.000943838	2.85e-12	-0.00316669	2.87e-12	-0.00427006	0	-0.0060249	4.53e-11	-0.00308309	0	-0.00492128	2.25e-11
1SMST9_004_3417	2019-06-03 11:24:39	0.74504	3.95e-05	-1.50822	0.00471	0.871509	0.00137	1.02483	0.00161	1.52942e-07	5.43e-08	7.28148e-08	1.62e-09	0.000882292	2.42e-06	0.025563	6.25e-05	7.57155	0.0612	0.00852792	6.05e-05	0.282673	4.23e-05	1.4668	7.48e-05	1.88689	0.00014	1.93772	0.0119	0.0111643	7.2e-05	0.0119446	5.2e-05	0.000404547	8.82e-06	9.45597e-05	3.15e-05	-0.000954445	0	-0.00317222	1.19e-11	-0.00425769	0	-0.00601744	1.9e-11	-0.00303603	0	-0.00492022	1.1e-11
1SMST9_005_3418	2019-06-03 11:25:49	0.744955	3.68e-05	-1.49817	0.00439	0.869736	0.000592	1.02668	0.000699	1.18486e-07	4.61e-08	1.23688e-07	1.31e-09	0.00134409	6.84e-06	0.0410158	0.000351	12.4857	0.139	0.00847737	4.8e-05	0.282445	3.34e-05	1.46657	5.67e-05	1.88668	0.000113	2.50713	0.0107	0.0236407	0.0003	0.0241965	0.000225	0.000906404	1.12e-05	9.4297e-05	3.43e-05	-0.00097718	4.79e-12	-0.00317805	1.53e-11	-0.00427893	1.91e-11	-0.00601146	0	-0.00306787	1.76e-11	-0.0049103	2.09e-11
1SMST9_006_3419	2019-06-03 11:27:19	0.745016	6.28e-05	-1.50642	0.00753	0.87002	0.00142	1.02733	0.00167	9.05112e-08	1.07e-07	1.49877e-07	2.68e-09	0.001355	6.59e-06	0.0425731	0.00014	13.2886	0.238	0.00844414	0.000123	0.282713	7.4e-05	1.46665	0.000108	1.88661	0.000215	1.14148	0.00613	0.0109636	3.41e-05	0.0108737	2.01e-05	0.000493943	9.35e-06	3.69116e-05	3.7e-05	-0.000970527	5.61e-12	-0.00319826	0	-0.00427691	0	-0.00601712	1.45e-11	-0.00305265	1.71e-11	-0.00491499	8.6e-12
1SMST9_007_3422	2019-06-03 11:28:24	0.744964	5.26e-05	-1.49919	0.00627	0.871137	0.000995	1.02531	0.00116	-5.33985e-08	6.86e-08	1.88409e-07	2e-09	0.00138536	2.38e-06	0.0423595	0.000148	12.6044	0.13	0.00853067	7.81e-05	0.282596	4.88e-05	1.46667	8.76e-05	1.88648	0.000164	1.48202	0.0085	0.0142766	0.000128	0.0145233	9.9e-05	0.000811755	9.58e-06	-2.35369e-05	3.05e-05	-0.000973091	0	-0.00318737	1.26e-11	-0.00426441	1.75e-11	-0.00600682	0	-0.00305018	0	-0.00490977	0
1SMST9_008_3423	2019-06-03 11:29:31	0.7449	5.19e-05	-1.49158	0.0062	0.870429	0.000361	1.0262	0.000425	-2.19513e-08	7.55e-08	3.10294e-07	2.68e-09	0.0037775	9.13e-06	0.132034	0.000835	39.7431	0.513	0.00849324	9.47e-05	0.282568	5.68e-05	1.46666	8.54e-05	1.88691	0.000171	1.34344	0.00317	0.0399497	0.000327	0.0356072	0.000164	0.0012091	1.17e-05	-5.78176e-06	3.01e-05	-0.000964871	0	-0.00317449	0	-0.00426852	1.46e-11	-0.00601388	3.57e-11	-0.00305666	0	-0.00488795	0
1SMST9_009_3424	2019-06-03 11:30:21	0.744902	4.24e-05	-1.49174	0.00506	0.86938	0.000723	1.02721	0.000857	7.14676e-08	5.91e-08	1.67235e-07	1.73e-09	0.00153576	1.05e-06	0.0495971	0.000173	14.9898	0.139	0.00844114	6.83e-05	0.282501	4.79e-05	1.46664	7.57e-05	1.88688	0.000139	1.7147	0.00573	0.0193191	0.000122	0.0185292	7.07e-05	0.000836184	9.74e-06	3.64454e-05	3.05e-05	-0.000948519	7.04e-12	-0.00317511	3.24e-12	-0.00427515	3.19e-11	-0.00602891	1.9e-11	-0.00306077	1.54e-11	-0.0049099	3.08e-11
1SMST9_010_3425	2019-06-03 11:31:14	0.744938	4.17e-05	-1.49609	0.00497	0.870272	0.00157	1.02645	0.00185	-7.67912e-08	5.8e-08	1.19871e-07	1.82e-09	0.000749973	9.52e-07	0.0225923	9.47e-05	6.6176	0.0576	0.00870213	6.08e-05	0.282606	4.4e-05	1.46688	7.09e-05	1.88688	0.00014	1.75818	0.00667	0.00905382	6.97e-05	0.00925176	4.16e-05	0.000616736	1.04e-05	-4.00778e-05	3.09e-05	-0.000943296	2.93e-12	-0.0031796	1.4e-11	-0.00424641	2.25e-11	-0.00600878	1.73e-11	-0.00304219	0	-0.00491768	0
1SMST9_011_3426	2019-06-03 11:32:25	0.744914	4.68e-05	-1.49321	0.00558	0.867785	0.000797	1.02912	0.00094	-8.33978e-09	6.63e-08	5.16574e-07	2.08e-09	0.00143154	1.92e-06	0.0479758	9.07e-05	14.6249	0.132	0.00835525	6.81e-05	0.282475	4.92e-05	1.46659	8.07e-05	1.88679	0.000153	1.59937	0.0068	0.0173182	0.000102	0.0161493	4.88e-05	0.00239579	1.61e-05	-1.55386e-05	3.14e-05	-0.000960117	0	-0.00317293	0	-0.00428571	1.19e-11	-0.00603253	0	-0.00306479	0	-0.00491826	1.78e-11
1SMST9_012_3429	2019-06-03 11:33:23	0.744917	4.29e-05	-1.49359	0.00512	0.872258	0.00114	1.02425	0.00133	2.36174e-08	6.5e-08	1.84106e-07	1.75e-09	0.000986561	2.02e-06	0.0287661	8.38e-05	8.39507	0.0715	0.00877848	6.15e-05	0.282538	4.42e-05	1.46662	7.29e-05	1.88688	0.000145	1.74968	0.014	0.0114748	0.000103	0.012168	8.62e-05	0.000932312	1.18e-05	-3.00224e-06	3.45e-05	-0.000975213	4.06e-12	-0.00316499	0	-0.00426609	1.88e-11	-0.00602929	3.47e-11	-0.00304137	1.77e-11	-0.00489893	0
1SMST9_013_3430	2019-06-03 11:35:10	0.744973	3.7e-05	-1.50027	0.00441	0.869739	0.000941	1.02711	0.00112	-2.37617e-07	5.21e-08	1.40658e-07	1.45e-09	0.00105139	6.91e-07	0.0315201	6.54e-05	9.3795	0.0742	0.00851907	5.99e-05	0.282604	3.94e-05	1.46691	6.95e-05	1.88674	0.00013	1.98013	0.0072	0.0141465	7.66e-05	0.0146498	5.35e-05	0.000808444	8.9e-06	-0.000138265	3.02e-05	-0.000953851	0	-0.00317969	0	-0.00427409	1.95e-11	-0.00600745	2.53e-11	-0.00305632	0	-0.00490987	0
1SMST9_014_3431	2019-06-03 11:38:43	0.744895	3.91e-05	-1.49093	0.00467	0.868996	0.000785	1.02792	0.000921	-1.73385e-07	5.38e-08	6.76692e-08	1.35e-09	0.00132602	1.01e-06	0.0384154	7.31e-05	11.3048	0.08	0.00864671	5.43e-05	0.282565	3.47e-05	1.46686	6.03e-05	1.88718	0.000125	2.06561	0.0111	0.0180303	0.000128	0.0192657	9.92e-05	0.000409616	8.38e-06	-0.000126354	3.31e-05	-0.000943155	0	-0.00315687	0	-0.00426563	2.11e-11	-0.00601692	3.06e-11	-0.00306361	1.9e-11	-0.00489346	0
1SMST9_015_3432	2019-06-03 11:40:03	0.745015	4.07e-05	-1.50524	0.00485	0.869741	0.000672	1.02702	0.000798	1.60143e-06	9.69e-08	1.44672e-07	1.58e-09	0.00154054	3.99e-06	0.0445954	9.39e-05	12.9516	0.0933	0.00865827	5.53e-05	0.282715	3.95e-05	1.46691	7.26e-05	1.88687	0.000126	1.97541	0.0195	0.0196642	0.000162	0.0211229	0.000157	0.000828751	1.24e-05	0.000939684	6.4e-05	-0.000954368	5.41e-12	-0.00316755	0	-0.00425825	0	-0.00601742	0	-0.00306037	0	-0.00492885	0
1SMST9_016_3433	2019-06-03 11:47:49	0.744962	5.02e-05	-1.49898	0.00599	0.869036	0.000224	1.02778	0.000263	9.62468e-08	7.08e-08	4.61656e-07	2.14e-09	0.00505556	3.08e-06	0.186828	0.000549	58.9006	0.652	0.00817539	8.25e-05	0.28266	5.11e-05	1.46663	7.99e-05	1.88686	0.000158	1.54188	0.00631	0.0655546	0.000465	0.0549048	0.000257	0.00207496	1.51e-05	4.40932e-05	3.25e-05	-0.000948672	3.92e-12	-0.00318101	2.62e-11	-0.00427918	0	-0.00602655	3.47e-11	-0.00305555	1.88e-11	-0.00490926	0
1SMST9_017_3436	2019-06-03 11:49:12	0.74504	5.48e-05	-1.50824	0.00653	0.868669	0.000343	1.02828	0.000406	-1.03558e-08	7.84e-08	3.35945e-07	5.21e-09	0.00434915	9.23e-06	0.139448	0.000357	43.1636	0.467	0.00827452	8.33e-05	0.282681	4.93e-05	1.46643	8.66e-05	1.88633	0.000176	1.36053	0.00644	0.0428653	0.000304	0.0416988	0.000259	0.00131849	1.51e-05	1.14702e-05	3.23e-05	-0.00092717	6.05e-12	-0.00314439	0	-0.00427756	0	-0.00600343	2.9e-11	-0.00305415	1.15e-11	-0.00487787	0
1SMST9_018_3437	2019-06-03 11:50:13	0.744901	4.82e-05	-1.49168	0.00575	0.86941	0.00106	1.02755	0.00124	-2.25537e-07	6.8e-08	1.59032e-07	1.81e-09	0.0010902	1.12e-06	0.0340613	7e-05	10.038	0.096	0.00865652	7.42e-05	0.282648	4.91e-05	1.46655	7.35e-05	1.88674	0.000148	1.56387	0.00483	0.0120882	5.89e-05	0.0119956	3e-05	0.00072476	9.05e-06	-0.000102228	3.26e-05	-0.000920616	0	-0.00316579	2.18e-11	-0.00427193	0	-0.00600495	3.01e-11	-0.00303788	8.98e-12	-0.0049071	1.26e-11
1SMST9_019_3438	2019-06-03 11:51:37	0.744895	3.84e-05	-1.491	0.00458	0.86901	0.00182	1.0272	0.00215	7.30614e-08	6.24e-08	5.24277e-08	1.55e-09	0.000635845	1.11e-06	0.0192876	6.05e-05	5.64591	0.0471	0.00866315	6.05e-05	0.282453	3.92e-05	1.4665	7.2e-05	1.88689	0.000134	1.77001	0.00468	0.00772769	4.09e-05	0.00795113	3.02e-05	0.000272661	8.16e-06	2.87145e-05	3.34e-05	-0.000934461	2.74e-12	-0.00314578	2.07e-11	-0.00426014	0	-0.00602937	2.94e-11	-0.00303853	0	-0.00488278	0
1SMST9_020_3439	2019-06-03 11:52:55	0.744807	4.56e-05	-1.48115	0.00541	0.870343	0.000774	1.02596	0.000899	-2.49022e-08	6.81e-08	1.1065e-07	2.08e-09	0.00158903	7.31e-06	0.053107	0.00044	15.8952	0.202	0.0085105	7.2e-05	0.282551	4.97e-05	1.46664	7.57e-05	1.88691	0.000142	1.52155	0.00372	0.0183546	0.000164	0.0171406	9.1e-05	0.000489698	9.21e-06	-1.15984e-05	3.1e-05	-0.000959748	0	-0.00317869	0	-0.00428975	2.4e-11	-0.00603886	0	-0.00303552	0	-0.00490543	0
1SMST9_021_3440	2019-06-03 11:53:46	0.744981	3.62e-05	-1.50123	0.00432	0.870964	0.000908	1.02518	0.00108	-9.17992e-09	4.75e-08	5.29099e-08	1.43e-09	0.00119173	1.61e-06	0.0354109	0.000157	10.2054	0.0802	0.00871497	5.75e-05	0.282608	4.09e-05	1.46663	6.63e-05	1.88672	0.000114	1.98167	0.00858	0.0159005	0.000137	0.0166092	9.34e-05	0.00030089	8.12e-06	9.62844e-06	2.81e-05	-0.000940802	0	-0.00314482	4.99e-12	-0.00426176	0	-0.00602385	2.82e-11	-0.00303875	2.31e-11	-0.00489616	1.48e-11
1SMST9_022_3443	2019-06-03 11:54:52	0.744904	4e-05	-1.49206	0.00478	0.870027	0.00101	1.02665	0.00119	7.13354e-08	5.66e-08	8.2941e-08	1.54e-09	0.00114765	2.54e-05	0.0321864	0.00062	9.49655	0.204	0.00852805	5.59e-05	0.282564	3.84e-05	1.46677	7.37e-05	1.88697	0.000125	1.90606	0.0161	0.0132359	0.000162	0.0146228	0.000226	0.000457247	8.42e-06	6.33966e-05	3.18e-05	-0.000946385	3.61e-12	-0.00316672	1.85e-11	-0.00426404	0	-0.00601513	3.46e-11	-0.00305689	1.56e-11	-0.00490973	0
1SMST9_023_3444	2019-06-03 11:55:52	0.744867	3.6e-05	-1.48765	0.0043	0.870075	0.000536	1.02641	0.000627	1.33137e-07	5.57e-08	1.20684e-07	1.4e-09	0.00203125	9.6e-07	0.0610668	0.000111	18.144	0.156	0.00862185	6.67e-05	0.28256	3.75e-05	1.46665	6.24e-05	1.88686	0.000115	1.99138	0.00697	0.0276913	0.000149	0.0284734	9.02e-05	0.000699059	8.79e-06	7.63931e-05	3.34e-05	-0.000931906	0	-0.00315233	1.79e-11	-0.00424823	0	-0.00600728	8.2e-12	-0.00303093	0	-0.00489755	3.24e-11
1SMST9_024_3445	2019-06-03 11:57:27	0.744938	4.04e-05	-1.49613	0.00482	0.869	0.000628	1.02777	0.000734	-9.19165e-08	4.96e-08	6.35064e-08	1.4e-09	0.00160191	3.54e-06	0.0487439	0.000224	14.4495	0.115	0.00854981	5.6e-05	0.282497	3.64e-05	1.46664	6.2e-05	1.88667	0.000129	2.05252	0.00843	0.0226959	0.000194	0.0230956	0.000145	0.000385997	8.99e-06	-5.9373e-05	3.01e-05	-0.000924882	0	-0.00314871	0	-0.00426694	1.82e-11	-0.0060254	2.56e-11	-0.00303681	1.88e-11	-0.00488333	1.04e-11
1SMST9_025_3446	2019-06-03 11:58:35	0.744778	4.1e-05	-1.47704	0.0049	0.870707	0.00141	1.02631	0.00166	-3.84604e-08	6.94e-08	2.10265e-07	2.01e-09	0.000901422	4.14e-06	0.0290596	0.000218	8.53921	0.0969	0.00866345	7.26e-05	0.282389	4.78e-05	1.46652	7.52e-05	1.88697	0.000131	1.59769	0.0046	0.0105081	0.000107	0.0101386	7.37e-05	0.000973387	1.03e-05	-2.14025e-06	3.34e-05	-0.000928164	0	-0.00317832	0	-0.00425253	0	-0.00600862	1.43e-11	-0.00302841	1.1e-11	-0.00487509	3.43e-11
1SMST9_026_3447	2019-06-03 11:59:55	0.744932	4.4e-05	-1.49543	0.00525	0.869484	0.00121	1.02707	0.00142	-1.32173e-07	5.85e-08	1.35564e-07	1.67e-09	0.000963548	1.28e-05	0.0285412	0.000354	8.23457	0.114	0.00868288	6.34e-05	0.282631	4.25e-05	1.46656	7.66e-05	1.8869	0.000142	2.02403	0.0157	0.0128642	6.04e-05	0.0135918	7.61e-05	0.000797642	1.35e-05	-7.12523e-05	3.42e-05	-0.000918326	4.33e-12	-0.00313578	0	-0.00425237	0	-0.00600144	0	-0.0030186	1.78e-11	-0.00490519	3.56e-12
1SMST9_027_3450	2019-06-03 12:01:07	0.744861	4.7e-05	-1.4869	0.0056	0.867569	0.00108	1.02905	0.00127	4.35371e-08	6.78e-08	1.41171e-07	1.77e-09	0.00121714	8.58e-07	0.0367924	9.53e-05	11.3333	0.114	0.0082584	7.53e-05	0.282443	4.63e-05	1.46686	7.13e-05	1.8867	0.000151	1.56157	0.00547	0.013035	7.78e-05	0.0133901	4.56e-05	0.000641844	8.78e-06	2.99233e-05	3.2e-05	-0.00093976	0	-0.0031632	1.69e-11	-0.00428495	1.15e-11	-0.00598891	0	-0.00304297	1.65e-11	-0.00489196	1.43e-11
1SMST9_028_3451	2019-06-03 12:03:08	0.744861	4.05e-05	-1.48684	0.00484	0.867794	0.000892	1.02956	0.00106	-4.29494e-08	5.17e-08	3.36703e-07	1.55e-09	0.00106586	8.16e-07	0.035482	4.77e-05	10.5558	0.082	0.00854491	6.04e-05	0.28252	4.14e-05	1.46678	7.08e-05	1.88699	0.000125	1.86469	0.01	0.0149835	9.86e-05	0.0139862	7.6e-05	0.00182474	1.28e-05	-3.13809e-05	2.92e-05	-0.000913367	0	-0.00312766	7.28e-12	-0.00425436	0	-0.00600668	0	-0.00300352	2.66e-12	-0.00489004	0
1SMST9_029_3452	2019-06-03 12:04:11	0.744908	5.08e-05	-1.49248	0.00606	0.871667	0.00191	1.02554	0.00223	-1.00538e-07	7.36e-08	5.96298e-08	2.54e-09	0.000751243	4.19e-06	0.0227356	0.000217	6.68423	0.0872	0.00855607	7.5e-05	0.281991	4.53e-05	1.46674	7.72e-05	1.88675	0.000161	1.53113	0.00607	0.00791788	0.000106	0.00817948	7.75e-05	0.000267273	1.22e-05	-5.41869e-05	3.41e-05	-0.000936415	0	-0.00314329	0	-0.00426929	6.74e-12	-0.0060121	2.42e-11	-0.00304101	0	-0.00489136	3.03e-11
1SMST9_030_3453	2019-06-03 12:05:19	0.744942	5.07e-05	-1.49649	0.00605	0.869874	0.000532	1.02691	0.000629	-5.61046e-08	6.36e-08	1.87795e-07	1.86e-09	0.00286654	2.64e-06	0.0947438	0.000362	27.7669	0.31	0.00867926	9.59e-05	0.282652	5.11e-05	1.46673	7.87e-05	1.88679	0.000159	1.55531	0.00328	0.0332344	0.000184	0.0314193	8.46e-05	0.000847388	8.72e-06	-1.87126e-05	2.93e-05	-0.000934608	1.48e-12	-0.00314614	2.39e-12	-0.00426246	0	-0.0060239	0	-0.00304017	0	-0.00488334	0
1SMST9_031_3454	2019-06-03 12:07:55	0.744917	0.000136	-1.49322	0.0162	0.869944	0.00145	1.02673	0.00172	4.89513e-07	2.68e-07	3.1043e-08	6.44e-09	0.00334807	4.86e-06	0.105068	0.000451	35.2084	1.16	0.00803394	0.000255	0.282686	0.00016	1.46719	0.000245	1.88738	0.00045	0.455905	0.00556	0.0106944	0.000178	0.0106714	0.000143	4.01e-05	7.87e-06	4.84122e-05	3.39e-05	-0.000947375	4.43e-12	-0.00312648	1.2e-11	-0.00427071	1.81e-11	-0.00601204	0	-0.00301167	0	-0.00487534	0
1SMST9_031duplicate_3456	2019-06-03 12:09:14	0.745936	0.00155	-1.63694	0.18	0.87522	0.013	1.03267	0.0168	1.90574e-06	2.47e-06	8.53739e-08	7.18e-08	0.00347795	3.03e-05	0.104412	0.00142	0.98155	1.67	0.00403129	0.00323	0.282004	0.00152	1.46822	0.00231	1.88377	0.00396	0.0747902	0.00287	0.0017762	6.85e-05	0.00183138	6.98e-05	8.82339e-06	1.16e-05	2.20161e-05	4.25e-05	-0.000939683	0	-0.00315985	1.36e-11	-0.00427106	3.09e-11	-0.00601641	1.9e-11	-0.00305449	0	-0.0048968	0
1SMST9_032_3460	2019-06-03 12:11:38	0.745009	4.5e-05	-1.50461	0.00537	0.868566	0.00103	1.0282	0.00122	1.28882e-07	6.81e-08	1.30939e-07	1.64e-09	0.0010544	4.49e-06	0.0337381	9.45e-05	9.84851	0.0893	0.00870312	6.92e-05	0.282605	4.46e-05	1.46662	7.38e-05	1.88641	0.000152	1.6088	0.00507	0.0122985	3.13e-05	0.0119384	2.9e-05	0.000614057	7.67e-06	4.86879e-05	3.26e-05	-0.000938061	5.13e-12	-0.00317132	0	-0.00426498	0	-0.00603881	3.85e-11	-0.00304795	0	-0.00490917	1.27e-11
1SMST9_033_3461	2019-06-03 12:12:46	0.744934	3.94e-05	-1.49561	0.0047	0.867932	0.000733	1.02905	0.000869	-1.18725e-07	6.62e-08	6.65198e-08	1.74e-09	0.00164081	1.55e-06	0.0512467	7.22e-05	15.3859	0.146	0.00848583	7.55e-05	0.282571	4.72e-05	1.46658	7.53e-05	1.88674	0.000127	1.642	0.0068	0.0190314	0.000102	0.0189415	6.25e-05	0.000317005	8.4e-06	-6.11149e-05	3.28e-05	-0.000927235	0	-0.00314178	0	-0.00428928	0	-0.00601818	0	-0.00304716	7.85e-12	-0.00489007	0
1SMST9_034_3462	2019-06-03 12:14:49	0.744939	4.73e-05	-1.49623	0.00565	0.868749	0.000422	1.02813	0.000503	2.39148e-07	6.02e-08	1.318e-07	5.59e-09	0.00303827	9.47e-05	0.0907619	0.00256	26.7943	0.738	0.00836797	6.82e-05	0.282094	4.08e-05	1.46683	6.83e-05	1.88664	0.00015	1.69826	0.0127	0.0352355	0.000784	0.0360968	0.000892	0.000600034	2.38e-05	0.000127733	3.02e-05	-0.000944646	0	-0.00314629	0	-0.00430749	8.19e-12	-0.00604344	2.27e-11	-0.003081	0	-0.00490355	1.32e-11
2SMBT4_001_3485	2019-06-03 12:54:52	0.744816	5.35e-05	-1.48153	0.00639	0.873547	0.00192	1.02298	0.00223	9.2063e-08	8e-08	7.80592e-08	2.32e-09	0.000750066	4.11e-06	0.0233472	0.000206	7.44464	0.152	0.00867788	9.83e-05	0.282477	6.4e-05	1.46679	8.96e-05	1.88688	0.000176	1.29616	0.00375	0.00683306	7.83e-05	0.00684442	5.55e-05	0.000294487	9.09e-06	3.08943e-05	3.14e-05	-0.000945111	0	-0.00314478	0	-0.00425614	1.2e-11	-0.00601386	0	-0.00304336	4.11e-12	-0.00488093	0
2SMBT4_002_3486	2019-06-03 12:56:09	0.744839	4.02e-05	-1.48425	0.00479	0.871294	0.00163	1.02582	0.00192	6.44861e-08	5.68e-08	3.59058e-08	1.6e-09	0.00075365	1.45e-06	0.0220236	5.04e-05	6.43726	0.0577	0.0086144	6.64e-05	0.281943	4.09e-05	1.4667	7.01e-05	1.88672	0.000134	1.78436	0.0084	0.00897598	3.56e-05	0.00958079	3.09e-05	0.000183182	8.35e-06	2.59341e-05	3e-05	-0.00093521	0	-0.00314944	1.88e-11	-0.00423995	0	-0.00599682	1.53e-11	-0.00301837	0	-0.00487514	1.12e-11
2SMBT4_003_3484	2019-06-03 12:53:31	0.744777	4.31e-05	-1.47685	0.00515	0.869933	0.00268	1.02755	0.00311	1.10294e-07	7.15e-08	5.40837e-08	1.74e-09	0.000513889	2.13e-06	0.0149224	3.94e-05	4.36952	0.0437	0.00862078	6.99e-05	0.282464	4.35e-05	1.46666	7.6e-05	1.88689	0.000132	1.61619	0.00677	0.00543047	1.51e-05	0.00580603	1.38e-05	0.000255093	8.17e-06	6.28461e-05	3.43e-05	-0.000936853	4.35e-12	-0.00314269	0	-0.00425705	0	-0.00601608	2.37e-11	-0.00303456	1.64e-11	-0.00488599	2.17e-11
2SMBT4_004_3487	2019-06-03 12:57:38	0.744982	3.75e-05	-1.50139	0.00448	0.868729	0.00173	1.0292	0.00204	-1.81197e-08	4.53e-08	3.21042e-08	1.2e-09	0.00058358	4.49e-06	0.0161557	0.00014	4.79601	0.0503	0.00856906	4.73e-05	0.281989	3.25e-05	1.46687	7.15e-05	1.88685	0.000112	2.33784	0.012	0.00861309	0.000116	0.00969278	0.000122	0.0002192	8.23e-06	-1.18073e-06	3.18e-05	-0.000926829	1.33e-12	-0.00314029	1.64e-11	-0.00425557	0	-0.00599332	1.33e-11	-0.00304004	1.74e-11	-0.00486512	0
2SMBT4_005_3490	2019-06-03 12:59:24	0.744958	3.44e-05	-1.49849	0.00411	0.870784	0.00126	1.02537	0.00145	1.544e-08	4.84e-08	4.61527e-08	1.16e-09	0.000789098	2.38e-06	0.022017	5.06e-05	6.45498	0.0455	0.00858216	5.12e-05	0.282058	3.55e-05	1.46666	5.73e-05	1.8866	0.000104	2.30254	0.0127	0.011321	6.09e-05	0.0126505	5.53e-05	0.000308751	7.85e-06	2.03516e-06	3.37e-05	-0.00095247	0	-0.0031471	0	-0.00425685	3.13e-12	-0.00599688	7.78e-12	-0.00303444	0	-0.00486663	0
2SMBT4_006_3491	2019-06-03 13:01:34	0.745028	3.61e-05	-1.50686	0.00431	0.869868	0.000939	1.02683	0.00111	5.55511e-08	4.9e-08	1.02683e-07	1.37e-09	0.00105928	1.99e-06	0.0301782	6.51e-05	8.78501	0.061	0.00873504	5.3e-05	0.282587	3.57e-05	1.46659	6.04e-05	1.88659	0.00011	2.1686	0.00991	0.0147671	5.84e-05	0.0162469	4.92e-05	0.00064662	9.28e-06	2.91561e-05	3.21e-05	-0.000923999	3.53e-12	-0.00313672	2.34e-11	-0.0042361	0	-0.00600039	3.38e-11	-0.00302853	7.78e-12	-0.00488014	0
2SMBT4_007_3492	2019-06-03 13:02:54	0.745	5.93e-05	-1.50349	0.00708	0.869952	0.00133	1.02683	0.0016	7.59463e-08	8.83e-08	1.1735e-07	2.25e-09	0.00154062	4.97e-06	0.0430788	0.00016	12.9028	0.185	0.00843179	0.000105	0.282584	6.35e-05	1.46684	0.000105	1.88693	0.000196	1.19833	0.011	0.011602	0.000153	0.0129881	0.000163	0.000413873	9.1e-06	2.08523e-05	3.22e-05	-0.00094036	4.13e-12	-0.00314888	1.44e-11	-0.00425435	1.06e-12	-0.00600205	3.48e-11	-0.00304147	2.66e-11	-0.00487373	1.04e-11
2SMBT4_008_3493	2019-06-03 13:04:00	0.744957	4.08e-05	-1.49837	0.00486	0.870284	0.00127	1.02643	0.0015	-3.26045e-08	5.57e-08	4.81058e-08	1.53e-09	0.000719148	3.95e-06	0.0202644	0.000103	5.94884	0.0578	0.00857645	6.08e-05	0.282533	4.12e-05	1.46677	7.19e-05	1.88685	0.000124	1.92925	0.0105	0.00886571	4.52e-05	0.00977653	4.48e-05	0.000268302	8.39e-06	-2.25332e-05	3.23e-05	-0.000921944	6.38e-12	-0.00312695	1.08e-11	-0.00425049	2.6e-11	-0.00598597	2.47e-11	-0.00301483	1.42e-11	-0.004873	9.81e-12
2SMBT4_009_3494	2019-06-03 13:05:16	0.744923	8.25e-05	-1.4942	0.00984	0.869571	0.00411	1.03107	0.00497	9.11996e-08	1.37e-07	2.8462e-08	3.89e-09	0.000782042	8.61e-06	0.0199848	0.000175	7.54887	0.251	0.00840755	0.000154	0.282132	9.51e-05	1.46678	0.000154	1.88613	0.000279	0.865463	0.0113	0.00388762	0.000113	0.00445117	0.000105	6.18964e-05	8.91e-06	1.57839e-05	3.18e-05	-0.000920298	4.17e-12	-0.00311351	0	-0.00424746	0	-0.00598124	2.78e-11	-0.00300391	1.98e-11	-0.00488581	3.75e-12
2SMBT4_010_3497	2019-06-03 13:06:35	0.745009	4.41e-05	-1.50455	0.00525	0.86663	0.00183	1.03108	0.00221	6.72898e-08	5.53e-08	1.14365e-07	1.53e-09	0.000641017	3.02e-06	0.0181371	0.000105	5.42116	0.0502	0.00845478	5.92e-05	0.282449	4.03e-05	1.46667	7.19e-05	1.88669	0.000136	1.9009	0.00625	0.0078078	6.59e-05	0.00860301	6.45e-05	0.000633721	8.88e-06	4.58666e-05	3.21e-05	-0.000933612	0	-0.00316667	0	-0.00428793	2.71e-11	-0.00603011	0	-0.00305358	0	-0.00489372	0
2SMBT4_011_3498	2019-06-03 13:07:58	0.745011	5.08e-05	-1.50473	0.00605	0.871597	0.000949	1.02494	0.00112	2.74426e-09	6.75e-08	2.14526e-07	2e-09	0.00148306	1.19e-06	0.0441188	5.28e-05	12.865	0.125	0.00866377	7.52e-05	0.282526	5.07e-05	1.4667	8.83e-05	1.8863	0.000171	1.47296	0.00759	0.0145212	7.33e-05	0.0152601	7.31e-05	0.000925424	9.19e-06	1.30604e-05	3.06e-05	-0.000949623	0	-0.00316405	1.78e-11	-0.0042484	0	-0.00601954	3.19e-11	-0.00303828	2.23e-11	-0.00487246	0
2SMBT4_012_3499	2019-06-03 13:09:30	0.744963	6.17e-05	-1.49902	0.00736	0.872262	0.00162	1.02423	0.00193	2.40177e-07	8.9e-08	2.12089e-07	7.7e-09	0.00153489	8.54e-06	0.0405435	0.000292	12.222	0.212	0.00868386	0.000103	0.282264	6.36e-05	1.46693	0.000111	1.88663	0.000197	1.17506	0.0223	0.0109751	0.000247	0.012828	0.00025	0.000846195	3.92e-05	8.65978e-05	2.8e-05	-0.000934364	0	-0.00316301	1.45e-11	-0.00425563	0	-0.00602505	0	-0.0030138	0	-0.0048861	2.94e-11
2SMBT4_013_3500	2019-06-03 13:10:18	0.744911	4.86e-05	-1.49284	0.00579	0.869422	0.00159	1.02739	0.00189	1.96907e-07	6.6e-08	8.12534e-08	1.75e-09	0.000792935	1.49e-06	0.023282	5.3e-05	6.9975	0.0706	0.00856468	7.2e-05	0.282582	4.77e-05	1.46667	7.65e-05	1.88667	0.000157	1.62655	0.0138	0.00854555	8.58e-05	0.0090863	8.33e-05	0.00038931	9.13e-06	9.09435e-05	3.21e-05	-0.000922089	4.71e-12	-0.00313369	2.05e-11	-0.00427422	0	-0.00599535	0	-0.00304213	0	-0.00486076	0
2SMBT4_014_3503	2019-06-03 13:11:54	0.744943	3.8e-05	-1.49675	0.00453	0.86901	0.00185	1.02773	0.00217	1.55071e-07	5.13e-08	4.20585e-08	1.38e-09	0.000692044	1.82e-06	0.0186894	6.77e-05	5.44569	0.0466	0.00859704	5.57e-05	0.281996	3.56e-05	1.46679	7.8e-05	1.88665	0.000126	2.04126	0.00644	0.00864964	5.46e-05	0.0099779	4.98e-05	0.000250771	8.22e-06	0.000101104	3.18e-05	-0.000922987	0	-0.0031402	3.89e-12	-0.00426558	7.12e-12	-0.00601122	0	-0.00304176	0	-0.00488803	0
2SMBT4_015_3504	2019-06-03 13:13:01	0.744935	3.42e-05	-1.49573	0.00407	0.868486	0.000515	1.02855	0.000611	-2.02108e-08	4.95e-08	1.62521e-07	1.19e-09	0.00159918	7.69e-07	0.0507355	3.11e-05	14.9632	0.0906	0.00855689	4.85e-05	0.282575	3.04e-05	1.46664	5.71e-05	1.88663	0.000112	2.32351	0.0168	0.0265883	0.000193	0.0261343	0.000182	0.00110078	1.06e-05	-8.45061e-06	3.46e-05	-0.000916577	5.1e-12	-0.00313056	0	-0.00424556	1.27e-11	-0.00599957	6.05e-12	-0.00306255	0	-0.0048699	1.45e-11
2SMBT4_016_3505	2019-06-03 13:14:02	0.744789	3.57e-05	-1.47829	0.00426	0.869369	0.00311	1.02598	0.0037	-6.16424e-08	5.32e-08	1.00258e-08	1.46e-09	0.00038481	3.82e-06	0.00949058	0.000108	2.86197	0.0406	0.00843101	5.71e-05	0.28192	3.66e-05	1.4666	5.96e-05	1.88697	0.000113	1.96628	0.00469	0.00422544	4.41e-05	0.00536542	4.74e-05	5.99821e-05	8.34e-06	-3.30834e-05	3.15e-05	-0.000936652	0	-0.00312556	1.24e-11	-0.00425162	0	-0.00599604	0	-0.00303893	1.35e-11	-0.00485917	1.08e-11
2SMBT4_017_3506	2019-06-03 13:15:02	0.744862	3.96e-05	-1.48709	0.00472	0.868651	0.00119	1.02856	0.0014	1.37781e-07	5.24e-08	5.97876e-08	1.45e-09	0.000880249	3.54e-06	0.0260368	0.000135	7.82513	0.0668	0.0084946	5.34e-05	0.281853	3.63e-05	1.46667	6.23e-05	1.88686	0.000132	2.01734	0.0105	0.0119272	0.000121	0.0124613	0.000111	0.000348983	8.34e-06	9.0484e-05	3.17e-05	-0.000928581	0	-0.00314057	2.14e-11	-0.00425928	1.06e-11	-0.00600865	4.04e-11	-0.00302646	1.97e-11	-0.00486542	0
2SMBT4_018_3507	2019-06-03 13:15:56	0.744806	4.33e-05	-1.48031	0.00516	0.865881	0.00153	1.03207	0.00181	1.82973e-07	6.67e-08	7.44641e-08	2.06e-09	0.00083655	8.96e-06	0.0265807	0.000321	7.97775	0.12	0.00847424	7.28e-05	0.282376	5.03e-05	1.46678	8.27e-05	1.887	0.000157	1.5109	0.00589	0.00916219	0.000143	0.00905171	0.000132	0.000331378	9.5e-06	8.68247e-05	3.02e-05	-0.000920693	5.63e-12	-0.00314644	0	-0.0042473	0	-0.00601359	3.37e-11	-0.00302707	1.52e-11	-0.00485712	0
2SMBT4_019_3510	2019-06-03 13:17:04	0.74479	4.08e-05	-1.47845	0.00487	0.869115	0.00101	1.0279	0.00121	1.21923e-07	5.47e-08	1.03917e-07	1.54e-09	0.00115774	1.96e-06	0.03445	9.94e-05	10.2392	0.091	0.00852093	6.46e-05	0.282542	4.21e-05	1.46659	6.98e-05	1.88691	0.000128	1.76165	0.0104	0.0137213	0.000119	0.0143863	0.000108	0.000531994	8.11e-06	5.87936e-05	2.93e-05	-0.000933137	4.88e-12	-0.00313904	2.1e-11	-0.00425723	0	-0.00601023	0	-0.00303628	1.14e-11	-0.00488337	0
2SMBT4_020_3511	2019-06-03 13:18:45	0.7448	3.79e-05	-1.47959	0.00452	0.870989	0.00193	1.02592	0.00228	-1.44702e-07	4.66e-08	3.46189e-08	1.53e-09	0.000574914	2.11e-05	0.0173641	0.000646	5.11348	0.194	0.00868826	4.83e-05	0.281973	3.3e-05	1.46663	6.29e-05	1.88675	0.000116	2.32885	0.019	0.0083545	0.00026	0.00863881	0.000262	0.000232697	1.06e-05	-0.0001069	3.2e-05	-0.000922701	0	-0.0031528	0	-0.0042305	2.58e-11	-0.00599945	2e-12	-0.00303597	1.66e-11	-0.00486569	0
2SMBT4_021_3512	2019-06-03 13:21:19	0.744887	3.34e-05	-1.49001	0.00399	0.870693	0.00108	1.02606	0.00129	1.1604e-08	4.11e-08	2.3146e-08	1.13e-09	0.000756679	2.66e-06	0.021536	6.6e-05	6.31082	0.0442	0.00861299	4.88e-05	0.282023	3.48e-05	1.46684	6.09e-05	1.8869	0.000111	2.40204	0.0144	0.01172	6.64e-05	0.0127996	5.18e-05	0.00016581	8.11e-06	8.63186e-06	3.01e-05	-0.000908725	0	-0.00315214	0	-0.00423377	1.33e-11	-0.0060105	3.05e-11	-0.00301406	0	-0.00488575	0
2SMBT4b_001_3463	2019-06-03 12:18:54	0.744905	3.67e-05	-1.49213	0.00438	0.870497	0.000815	1.02605	0.000959	-8.91045e-08	4.57e-08	2.2817e-08	1.06e-09	0.000973046	2.23e-06	0.0293376	0.000106	8.59465	0.0573	0.00859123	4.42e-05	0.28199	2.81e-05	1.46686	6.17e-05	1.88675	0.000114	2.38937	0.00746	0.0156544	9.31e-05	0.0161705	5.4e-05	0.000158273	7.4e-06	-7.00725e-05	3.25e-05	-0.000935418	0	-0.00316671	1.79e-11	-0.00426351	0	-0.00600386	0	-0.0030437	0	-0.00487781	2.05e-11
2SMBT4b_002_3464	2019-06-03 12:20:32	0.744905	3.67e-05	-1.49213	0.00438	0.870497	0.000815	1.02605	0.000959	-8.91045e-08	4.57e-08	2.2817e-08	1.06e-09	0.000973046	2.23e-06	0.0293376	0.000106	8.59465	0.0573	0.00859123	4.42e-05	0.28199	2.81e-05	1.46686	6.17e-05	1.88675	0.000114	2.38937	0.00746	0.0156544	9.31e-05	0.0161705	5.4e-05	0.000158273	7.4e-06	-7.00725e-05	3.25e-05	-0.000935418	0	-0.00316671	1.79e-11	-0.00426351	0	-0.00600386	0	-0.0030437	0	-0.00487781	2.05e-11
2SMBT4b_003_3467	2019-06-03 12:22:21	0.744955	3.82e-05	-1.49815	0.00455	0.869066	0.00175	1.02798	0.00208	5.06878e-08	4.98e-08	4.0028e-08	1.52e-09	0.000626699	1.26e-06	0.0184114	3.25e-05	5.3781	0.0445	0.00866076	5.99e-05	0.282437	4.01e-05	1.46673	7.01e-05	1.88673	0.000126	1.89011	0.011	0.0078311	4.63e-05	0.0083011	3.63e-05	0.000220962	8.58e-06	1.6494e-05	2.84e-05	-0.000936128	3.16e-12	-0.0031599	0	-0.00425947	0	-0.00601098	0	-0.00302348	1.71e-11	-0.00490424	0
2SMBT4b_004_3468	2019-06-03 12:23:32	0.744795	4.42e-05	-1.47905	0.00528	0.870609	0.000761	1.02614	0.000898	1.03794e-07	5.65e-08	3.06774e-08	1.55e-09	0.00154169	1.03e-06	0.0479766	0.000134	14.1847	0.118	0.00857872	6.1e-05	0.281946	4.21e-05	1.46677	7.32e-05	1.88723	0.000132	1.83668	0.00806	0.0199742	0.000144	0.0198677	9.16e-05	0.000163903	8.41e-06	5.45552e-05	3.09e-05	-0.000942799	6.33e-12	-0.00315905	1.5e-11	-0.00425137	0	-0.00601305	2.75e-11	-0.00303911	0	-0.00487994	0
2SMBT4b_005_3469	2019-06-03 12:24:49	0.744936	3.85e-05	-1.4959	0.00459	0.86467	0.00158	1.03388	0.00188	8.51414e-08	4.2e-08	2.52545e-08	1.32e-09	0.000629326	9.02e-07	0.0175104	3.11e-05	5.1389	0.0399	0.00865959	5.46e-05	0.281981	3.8e-05	1.46657	7.06e-05	1.88686	0.000122	2.19136	0.011	0.00863102	4.74e-05	0.0097032	4.54e-05	0.000160412	8.44e-06	5.91103e-05	2.74e-05	-0.000925744	1.99e-12	-0.00312931	2.19e-11	-0.00426874	0	-0.00602938	0	-0.00306767	0	-0.00486777	0
2SMBT4b_006_3470	2019-06-03 12:26:10	0.744852	6.86e-05	-1.48582	0.00819	0.86984	0.00256	1.02878	0.00303	5.04445e-08	1e-07	4.23622e-08	3.06e-09	0.000865107	4.7e-06	0.0247422	0.000128	7.59476	0.137	0.00860564	0.000124	0.282087	7.19e-05	1.46658	0.000112	1.88671	0.000226	1.06394	0.0107	0.00598337	8.69e-05	0.00653528	9.7e-05	0.000135819	9.7e-06	7.2399e-06	3.11e-05	-0.000954531	4.98e-12	-0.00316639	0	-0.00427379	0	-0.00602411	0	-0.00304728	0	-0.00489391	8.2e-12
2SMBT4b_007_3471	2019-06-03 12:29:25	0.744834	5.73e-05	-1.48368	0.00684	0.869395	0.000526	1.02747	0.000622	-8.5837e-08	8.72e-08	1.8431e-07	2.44e-09	0.00242625	6.96e-06	0.101651	0.000117	31.1231	0.39	0.00845655	9.2e-05	0.282296	5.6e-05	1.46685	0.000101	1.88714	0.000177	1.24697	0.00494	0.0285931	9.46e-05	0.021191	3.44e-05	0.000667885	8.88e-06	-2.98828e-05	3.22e-05	-0.000951331	0	-0.0031568	2.32e-11	-0.00426925	2.68e-11	-0.00603086	0	-0.00306743	2.25e-11	-0.00490444	0
2SMBT4b_008_3474	2019-06-03 12:30:38	0.74491	4.46e-05	-1.49268	0.00532	0.873843	0.00168	1.0229	0.00197	-1.60123e-07	6e-08	2.64346e-08	1.82e-09	0.000699149	1.93e-06	0.0218188	4.2e-05	6.36243	0.0571	0.00871324	6.55e-05	0.281469	4.4e-05	1.4669	6.88e-05	1.88682	0.000137	1.64067	0.00833	0.00810758	4.94e-05	0.00805554	2.22e-05	0.000125545	8.64e-06	-8.26284e-05	2.92e-05	-0.000941145	0	-0.0031432	0	-0.00424593	0	-0.00600124	0	-0.00305804	8.12e-12	-0.0048681	0
2SMBT4b_009_3475	2019-06-03 12:32:31	0.744744	3.87e-05	-1.47292	0.00462	0.869321	0.000768	1.02768	0.000909	1.92755e-07	5.46e-08	5.78684e-08	1.49e-09	0.00140561	5.43e-06	0.0471106	0.000126	13.7825	0.106	0.00863403	5.92e-05	0.281945	3.92e-05	1.46668	6.9e-05	1.88698	0.000123	1.87763	0.0073	0.0200385	6.65e-05	0.0184513	6.57e-05	0.000315133	8.25e-06	0.000103815	3.04e-05	-0.000916755	0	-0.00315108	2.1e-11	-0.00425882	0	-0.00603922	0	-0.00303023	1.59e-11	-0.00489386	0
2SMBT4b_010_3476	2019-06-03 12:34:50	0.74492	4.25e-05	-1.49395	0.00507	0.868945	0.000957	1.02775	0.00112	4.04904e-08	5.79e-08	5.74775e-08	1.68e-09	0.00107054	7.87e-07	0.0391197	0.00015	11.5581	0.115	0.00858384	6.97e-05	0.282165	4.32e-05	1.46672	7.78e-05	1.88699	0.000141	1.73552	0.00517	0.0153766	9.81e-05	0.013077	4.13e-05	0.000289609	8.54e-06	2.11559e-05	3.01e-05	-0.000929198	2.54e-12	-0.00314333	8.82e-12	-0.00425275	1.88e-11	-0.00602493	1.78e-11	-0.00302465	1.74e-11	-0.00488346	3.28e-11
2SMBT4b_011_3477	2019-06-03 12:46:55	0.744839	3.8e-05	-1.48425	0.00453	0.870297	0.000809	1.02655	0.000956	-1.07479e-08	5.89e-08	3.29378e-08	1.67e-09	0.00134764	1.4e-06	0.0388285	0.000125	11.4371	0.0826	0.00855777	5.63e-05	0.282242	3.98e-05	1.46678	7.08e-05	1.88699	0.00012	1.79601	0.0081	0.015828	0.000119	0.0170206	8.39e-05	0.000172729	8.77e-06	-6.87252e-06	3.18e-05	-0.000943677	0	-0.00312355	0	-0.00424528	0	-0.00599733	0	-0.00304104	1.98e-11	-0.00489693	2.12e-11
2SMBT4b_012_3478	2019-06-03 12:48:32	0.744973	7.41e-05	-1.50017	0.00884	0.86894	0.00313	1.02784	0.00374	1.03209e-07	9.75e-08	1.83815e-08	2.87e-09	0.00064317	3.58e-06	0.0200188	0.000143	5.9323	0.105	0.00878654	0.000121	0.282176	7.17e-05	1.46676	0.000101	1.8863	0.000235	1.01378	0.00427	0.00458531	4.61e-05	0.00458686	3.46e-05	5.43015e-05	8.41e-06	3.40976e-05	3.02e-05	-0.000934118	0	-0.00316378	9.98e-12	-0.00425496	1.65e-11	-0.00602492	0	-0.00303955	0	-0.00488997	0
2SMBT4b_013_3481	2019-06-03 12:49:42	0.745075	4.44e-05	-1.51248	0.00529	0.868784	0.00104	1.02724	0.00126	8.05054e-08	6.22e-08	2.13223e-08	1.66e-09	0.00101177	4.44e-06	0.0329307	0.000122	9.63315	0.083	0.00867182	6.27e-05	0.282053	4.28e-05	1.46643	7.29e-05	1.88613	0.000138	1.76731	0.00652	0.0131418	5.64e-05	0.0126554	3.93e-05	0.000110085	8.46e-06	4.702e-05	3.3e-05	-0.000925079	0	-0.00313669	0	-0.00424884	1.76e-11	-0.00602331	0	-0.00304329	0	-0.00487858	0
2SMBT4b_014_3482	2019-06-03 12:51:10	0.744762	5.76e-05	-1.47512	0.00688	0.872038	0.00374	1.02327	0.00417	-1.12584e-07	9.18e-08	1.80626e-08	2.14e-09	0.000477684	2.7e-06	0.0137541	0.000109	4.11451	0.065	0.00866421	9.49e-05	0.281628	5.36e-05	1.4668	9.18e-05	1.88716	0.00018	1.28893	0.00491	0.00400062	4.66e-05	0.00433367	4.07e-05	6.80034e-05	8.01e-06	-4.45576e-05	3.54e-05	-0.000912308	0	-0.00312753	0	-0.00424437	0	-0.00599807	4.47e-11	-0.00302479	2.36e-11	-0.00486384	2.78e-11
2SMBT4b_015_3483	2019-06-03 12:52:14	0.744942	3.69e-05	-1.49651	0.0044	0.86865	0.00166	1.02871	0.00199	-1.9891e-08	4.29e-08	3.87558e-08	1.19e-09	0.000544922	8.93e-06	0.0160027	0.000217	4.59641	0.0657	0.00862812	5.01e-05	0.281995	3.41e-05	1.46652	6.97e-05	1.88647	0.000121	2.24959	0.00483	0.00800302	9.52e-05	0.0084979	0.000125	0.000250983	7.78e-06	-1.81511e-05	2.88e-05	-0.000930252	0	-0.00313094	0	-0.00426983	1.73e-11	-0.00603761	0	-0.00304735	1.7e-11	-0.00487016	1.81e-11
2SMST112_001_3366	2019-05-24 14:58:31	0.744896	5.77e-05	-1.49099	0.00688	0.868659	0.00116	1.0285	0.00138	2.48437e-07	7.22e-08	1.42088e-07	2.28e-09	0.00117381	1.85e-05	0.0342403	0.000677	11.0193	0.288	0.00856272	8.3e-05	0.28254	5.66e-05	1.46689	0.000108	1.88678	0.000177	1.49176	0.0289	0.0112395	0.000102	0.0119838	8.28e-05	0.000627716	1.73e-05	0.000104912	3.14e-05	-0.000981093	6.8e-12	-0.00318974	1.25e-11	-0.00431204	0	-0.00605365	2.86e-12	-0.00307818	0	-0.00492679	0
2SMST112_002_3367	2019-05-24 14:59:26	0.745225	5.21e-05	-1.5303	0.00621	0.863827	0.00295	1.03428	0.00349	-2.02689e-07	7.2e-08	6.50991e-09	2.55e-09	0.000653346	1.71e-06	0.0180821	7.04e-05	5.44272	0.0693	0.00840961	8.39e-05	0.281819	5.71e-05	1.46662	9.84e-05	1.88617	0.000177	1.27551	0.00779	0.00519637	5.04e-05	0.00589149	4.52e-05	2.32436e-05	9.51e-06	-8.83873e-05	2.66e-05	-0.000967877	6.05e-12	-0.00315844	0	-0.00432153	0	-0.00602193	5.17e-12	-0.00310242	4.61e-12	-0.00492394	0
2SMST112_003_3368	2019-05-24 15:03:01	0.745148	7.34e-05	-1.52108	0.00876	0.870576	0.00176	1.02634	0.00207	7.97522e-08	9.79e-08	6.97639e-08	2.9e-09	0.00123058	9.79e-06	0.0325678	0.000277	9.79205	0.169	0.00860604	0.000117	0.28249	6.78e-05	1.46681	0.000111	1.8866	0.000236	1.07005	0.0126	0.00786107	0.000129	0.00937206	0.00015	0.000217821	9.31e-06	2.86601e-05	3.06e-05	-0.000967574	0	-0.0031785	0	-0.00428825	1.66e-11	-0.00604561	4.44e-11	-0.00310917	1.8e-11	-0.0049279	0
2SMST112_004overwrite_3369	2019-05-24 15:05:28	0.74503	4.22e-05	-1.50704	0.00503	0.867845	0.00135	1.02955	0.00158	4.8745e-08	4.83e-08	2.27235e-07	1.72e-09	0.000742954	1.71e-06	0.0210163	8.07e-05	6.38783	0.0663	0.00858272	5.46e-05	0.282462	3.53e-05	1.46674	7.24e-05	1.88702	0.000135	2.1068	0.0124	0.0100689	0.000108	0.0110312	9.84e-05	0.00139479	1.64e-05	2.6536e-05	3.1e-05	-0.000964868	0	-0.00319483	0	-0.00430392	3.39e-11	-0.00603008	0	-0.00309999	2.04e-11	-0.00491817	3.54e-11
2SMST112_005overwrite_3370	2019-05-24 15:07:16	0.745016	5.11e-05	-1.50541	0.00609	0.869611	0.000711	1.02715	0.000831	-1.14436e-07	7.63e-08	2.61337e-07	2.31e-09	0.00223173	3.17e-06	0.067808	0.000225	20.3964	0.295	0.00857085	0.000102	0.282684	6.04e-05	1.46653	8.88e-05	1.88659	0.000159	1.49702	0.00886	0.0231101	0.00021	0.0235936	0.000171	0.00112983	1e-05	-4.57413e-05	3.35e-05	-0.000946961	6.86e-12	-0.00317459	0	-0.00427113	2.76e-11	-0.00602698	0	-0.00307693	1.65e-11	-0.0049254	0
2SMST112_006_3373	2019-05-24 15:08:50	0.745104	4.99e-05	-1.5175	0.00596	0.868068	0.000264	1.02897	0.000313	3.10724e-08	5.52e-08	3.31386e-07	1.82e-09	0.00497199	1.64e-06	0.143409	0.000216	44.0126	0.433	0.00828089	7.48e-05	0.28272	4.61e-05	1.46668	7.76e-05	1.88688	0.000157	1.65095	0.0097	0.0534994	0.000388	0.0577264	0.000326	0.00159855	1.46e-05	2.95488e-05	2.75e-05	-0.000946088	7.32e-12	-0.00317435	0	-0.00429426	2.53e-11	-0.00603223	0	-0.00306261	0	-0.00490186	2.97e-11
2SMST112_007_3374	2019-05-24 15:09:44	0.745084	4.01e-05	-1.51351	0.00479	0.871281	0.0013	1.02549	0.00152	1.47643e-08	5.95e-08	1.24275e-07	1.54e-09	0.000980559	2.79e-06	0.0289583	3.46e-05	8.52795	0.0843	0.00865108	7.22e-05	0.282622	4.71e-05	1.46663	7.05e-05	1.8868	0.000132	1.8026	0.0081	0.0117883	4.66e-05	0.012451	2.79e-05	0.0006509	8.56e-06	9.9079e-06	3.24e-05	-0.000968134	0	-0.0032074	2.36e-12	-0.00427323	0	-0.00602133	0	-0.0030439	0	-0.00492175	0
2SMST112_008_3375	2019-05-24 15:10:50	0.745081	4.93e-05	-1.51316	0.00588	0.871472	0.00128	1.02517	0.00153	-1.17692e-07	7.09e-08	7.66786e-08	2e-09	0.0010317	2.56e-06	0.0324484	0.00012	9.53584	0.118	0.00863968	9.34e-05	0.282538	5.15e-05	1.46647	8.46e-05	1.8867	0.000164	1.59807	0.00546	0.0117154	8.01e-05	0.0115961	3.84e-05	0.000356589	9.77e-06	-5.88122e-05	3.44e-05	-0.000965271	6.63e-12	-0.00318246	0	-0.00426745	0	-0.00601619	4.58e-11	-0.00305423	1.1e-11	-0.00490292	0
2SMST112_009_3376	2019-05-24 15:11:50	0.745202	4.31e-05	-1.52753	0.00514	0.864833	0.00194	1.03183	0.00235	7.07854e-08	6.29e-08	6.02767e-08	1.58e-09	0.000688058	3.03e-06	0.0195099	6.61e-05	5.81922	0.0601	0.00854187	7.17e-05	0.282541	4.24e-05	1.46658	8.36e-05	1.88661	0.000129	1.72001	0.00916	0.00746163	2.93e-05	0.008232	2.27e-05	0.000299791	7.96e-06	3.31863e-05	3.26e-05	-0.000961396	0	-0.00316721	2.47e-11	-0.00429678	6.59e-12	-0.00603192	4.03e-11	-0.00308054	1.62e-11	-0.00492351	0
2SMST112_010_3377	2019-05-24 15:13:39	0.745653	0.000365	-1.5803	0.0435	0.875469	0.00952	1.02268	0.0112	1.48835e-06	5.94e-07	9.11467e-08	1.61e-08	0.00179868	1.22e-05	0.0470889	0.000364	8.10571	1.64	0.00892498	0.000848	0.283339	0.000508	1.46655	0.000727	1.88352	0.00119	0.228055	0.00141	0.00239967	1.8e-05	0.00288643	1.57e-05	5.80219e-05	1.09e-05	9.31414e-05	3.97e-05	-0.000981109	0	-0.00318263	0	-0.00427553	2.65e-11	-0.00603406	7.59e-12	-0.00306145	0	-0.00490575	3.05e-11
2SMST112_011_3380	2019-05-24 15:16:43	0.744976	5.06e-05	-1.50062	0.00603	0.870876	0.00238	1.02647	0.00274	-6.8725e-08	7.71e-08	8.00829e-08	2.07e-09	0.000921467	2.22e-06	0.0254835	5.23e-05	7.29885	0.109	0.00885149	0.000116	0.28259	6.36e-05	1.46681	9.2e-05	1.88698	0.000174	1.36591	0.00747	0.00788703	3.86e-05	0.00883273	2.99e-05	0.000325023	8.67e-06	-2.93624e-05	3.19e-05	-0.000943634	0	-0.0031944	0	-0.00429191	0	-0.00602172	0	-0.00306542	6.59e-12	-0.00491562	2.13e-12
2SMST112_012_3381	2019-05-24 15:17:32	0.745125	4.2e-05	-1.51842	0.00501	0.869598	0.000561	1.02715	0.000659	8.31157e-08	5.94e-08	1.67518e-07	1.71e-09	0.00218881	1.49e-06	0.0673608	0.000115	20.2596	0.192	0.00847571	7.14e-05	0.282689	4.22e-05	1.46652	7.94e-05	1.88644	0.000136	1.81161	0.0112	0.0277292	0.000221	0.0278567	0.000157	0.000885906	1.13e-05	5.53268e-05	3.28e-05	-0.000977564	0	-0.00318225	0	-0.00428499	3.04e-11	-0.00600444	0	-0.0030858	0	-0.00492368	0
2SMST112_013_3382	2019-05-24 15:19:18	0.745068	4.44e-05	-1.51158	0.0053	0.868444	0.000823	1.02829	0.000966	-2.31167e-08	6e-08	1.46916e-07	1.74e-09	0.00163607	1.2e-05	0.0469965	0.000289	13.5921	0.172	0.00848726	7.17e-05	0.282595	4.57e-05	1.46664	7.19e-05	1.88681	0.00014	1.7367	0.0186	0.017438	7.82e-05	0.0189199	7.87e-05	0.000741505	1.19e-05	-2.19818e-05	3.06e-05	-0.000965701	0	-0.00318207	0	-0.00428487	5.34e-12	-0.00601971	2.48e-11	-0.00305685	8.3e-12	-0.00491109	0
2SMST112_014_3383	2019-05-24 15:20:23	0.744952	4.2e-05	-1.49777	0.00501	0.86884	0.000567	1.02814	0.000671	-8.50643e-08	5.56e-08	2.26236e-07	1.88e-09	0.00196978	2.91e-06	0.0603477	0.000264	17.9591	0.177	0.00866041	7.23e-05	0.28262	4.23e-05	1.4667	7.88e-05	1.88689	0.000138	1.79388	0.00929	0.0249002	0.000241	0.0250088	0.00016	0.00117996	1.31e-05	-5.88999e-05	3.04e-05	-0.000959194	0	-0.00315915	2.27e-11	-0.00427471	0	-0.00601869	0	-0.00303547	0	-0.00490143	0
2SMST112_015_3384	2019-05-24 15:22:22	0.744952	4.2e-05	-1.49777	0.00501	0.86884	0.000567	1.02814	0.000671	-8.50643e-08	5.56e-08	2.26236e-07	1.88e-09	0.00196978	2.91e-06	0.0603477	0.000264	17.9591	0.177	0.00866041	7.23e-05	0.28262	4.23e-05	1.4667	7.88e-05	1.88689	0.000138	1.79388	0.00929	0.0249002	0.000241	0.0250088	0.00016	0.00117996	1.31e-05	-5.88999e-05	3.04e-05	-0.000959194	0	-0.00315915	2.27e-11	-0.00427471	0	-0.00601869	0	-0.00303547	0	-0.00490143	0
2SMST112_016_3387	2019-06-03 10:49:35	0.745078	4.07e-05	-1.51276	0.00485	0.86827	0.000622	1.02873	0.000732	4.48295e-08	5.8e-08	2.70565e-07	1.51e-09	0.00186339	6.66e-06	0.0551529	0.000149	16.3782	0.162	0.00858605	7.65e-05	0.282639	4.81e-05	1.46636	7.46e-05	1.88654	0.000137	1.77019	0.00773	0.021708	8.84e-05	0.0230807	3.61e-05	0.00138459	9.36e-06	1.37321e-05	3.02e-05	-0.000950069	0	-0.00318044	0	-0.00427823	1.73e-11	-0.0060389	0	-0.00306522	0	-0.00493114	3.73e-11
2SMST112_017_3388	2019-06-03 10:53:05	0.745022	4.3e-05	-1.50609	0.00513	0.868015	0.000481	1.02901	0.000567	-7.28897e-09	5.65e-08	4.53314e-07	1.45e-09	0.0019271	7.05e-07	0.06504	8.06e-05	19.4614	0.157	0.00841233	6.52e-05	0.282493	3.82e-05	1.46659	6.83e-05	1.88674	0.00014	1.85804	0.00856	0.0274178	0.000155	0.0251899	0.000113	0.00246356	1.08e-05	-7.62467e-06	3.19e-05	-0.00095757	0	-0.00316111	0	-0.00429868	3.26e-11	-0.00602284	0	-0.00306059	0	-0.00490215	0
2SMST112_018_3389	2019-06-03 10:54:41	0.744974	3.52e-05	-1.50044	0.0042	0.869833	0.00047	1.02685	0.00055	2.52037e-07	5.69e-08	1.73891e-07	2.66e-09	0.00207942	7.44e-06	0.066433	0.000239	19.8788	0.171	0.00853	5.63e-05	0.282062	3.56e-05	1.4667	6.77e-05	1.88701	0.000111	2.02989	0.0169	0.0299939	0.000247	0.0292747	0.000179	0.00102387	2.22e-05	0.000160528	3.47e-05	-0.000980172	4.57e-12	-0.003192	1.59e-11	-0.0042894	0	-0.00604461	3.21e-11	-0.00306178	1.05e-11	-0.00493588	2.33e-11
2SMST112_019_3390	2019-06-03 10:56:00	0.745092	3.74e-05	-1.51501	0.00443	0.869382	0.000914	1.02735	0.00108	1.53802e-07	4.91e-08	1.12535e-07	1.41e-09	0.00109104	5.61e-06	0.0350935	0.000241	10.281	0.109	0.00863376	5.56e-05	0.282651	3.57e-05	1.46665	6.26e-05	1.88659	0.000121	2.1769	0.0171	0.0174602	0.000252	0.0168684	0.000213	0.000712752	9.11e-06	0.000105183	3.21e-05	-0.000973805	0	-0.00318963	0	-0.0042991	0	-0.00605565	1.62e-11	-0.00306595	0	-0.00494286	0
2SMST112_020_3391	2019-06-03 10:59:13	0.745096	5.26e-05	-1.51489	0.00628	0.86709	0.000824	1.03034	0.000978	-4.54719e-08	6.74e-08	4.7481e-07	2.33e-09	0.00180921	5.26e-06	0.0528939	8.31e-05	15.8191	0.171	0.00848994	8.69e-05	0.282581	5.55e-05	1.46658	9.03e-05	1.88658	0.000162	1.52389	0.0118	0.0181519	0.000118	0.019293	9.58e-05	0.00211487	2.35e-05	-7.73844e-06	3.07e-05	-0.000951572	0	-0.00318257	0	-0.00428011	1.57e-11	-0.00601971	0	-0.00304566	0	-0.00490862	1.74e-11
2SMST112_021_3394	2019-06-03 11:00:34	0.744992	5.35e-05	-1.50247	0.00638	0.868491	0.000326	1.02848	0.000386	-9.12797e-08	6.97e-08	3.98274e-07	1.9e-09	0.00426639	2e-06	0.146799	0.000211	45.3805	0.515	0.00826887	9.54e-05	0.28272	5.57e-05	1.46659	8.69e-05	1.88705	0.000163	1.4914	0.00913	0.0495805	0.000368	0.0447582	0.000294	0.0017258	1.45e-05	-5.45105e-05	3.18e-05	-0.000960387	3.64e-12	-0.00318453	1.81e-11	-0.00429742	1.04e-11	-0.0060419	0	-0.00308673	1.64e-11	-0.00493079	0
2SMST112_022_3395	2019-06-03 11:01:40	0.745119	5.81e-05	-1.51762	0.00693	0.870222	0.000903	1.02651	0.00107	-1.04617e-07	8.08e-08	2.86333e-07	2.11e-09	0.00191224	4.83e-06	0.0554522	0.000316	16.5897	0.227	0.00862746	0.000106	0.282666	5.95e-05	1.46681	8.88e-05	1.8865	0.000182	1.36441	0.00846	0.0172588	0.000199	0.0184282	0.000157	0.00113932	9.3e-06	-5.06425e-05	3.35e-05	-0.00094159	0	-0.00318948	0	-0.00428288	0	-0.00601829	0	-0.00308132	0	-0.00491404	0
2SMST112_023_3396	2019-06-03 11:02:59	0.745197	3.34e-05	-1.52755	0.00401	0.870222	0.00101	1.02655	0.00118	3.74928e-08	4.37e-08	1.20546e-07	1.53e-09	0.000960989	1.95e-05	0.0299284	0.000711	8.96543	0.225	0.00873007	6.03e-05	0.282616	3.66e-05	1.46644	6.46e-05	1.88624	0.00011	2.21136	0.00996	0.0153022	0.000427	0.0153737	0.000378	0.000777409	1.19e-05	2.98516e-05	2.89e-05	-0.000964721	2.9e-12	-0.00317655	6.54e-12	-0.00427607	0	-0.00604991	0	-0.00305788	0	-0.00491868	2.63e-11
2SMST112_024_3397	2019-06-03 11:03:52	0.745051	4.24e-05	-1.50954	0.00505	0.86853	0.000752	1.0286	0.000894	1.20461e-07	5.45e-08	4.21057e-07	1.72e-09	0.00153049	4.62e-06	0.04692	0.000229	14.1018	0.141	0.00851875	6.97e-05	0.282518	3.97e-05	1.46655	6.76e-05	1.88686	0.000125	2.02212	0.0137	0.0218202	0.000253	0.022113	0.00022	0.0024802	2.35e-05	8.32091e-05	3.3e-05	-0.000944742	0	-0.00317629	1.48e-11	-0.00431256	0	-0.0060369	3.57e-11	-0.00305336	0	-0.00490211	1.69e-11
2SMST112_025_3398	2019-06-03 11:05:10	0.744981	4.03e-05	-1.50124	0.00481	0.869097	0.000462	1.02772	0.000543	8.91717e-08	5.75e-08	1.82601e-07	1.56e-09	0.0022645	1.79e-06	0.0718687	9.65e-05	21.2724	0.188	0.00860482	6.87e-05	0.282682	4.5e-05	1.46647	6.77e-05	1.88676	0.000136	1.80356	0.00781	0.0293935	0.000166	0.0287197	0.000105	0.000962602	9.15e-06	4.13358e-05	3.09e-05	-0.000956292	5.02e-12	-0.00317771	0	-0.00427189	0	-0.00602622	2.49e-11	-0.00302336	1.9e-11	-0.0049086	2.07e-11
2SMST112_026_3401	2019-06-03 11:07:04	0.745064	3.32e-05	-1.51109	0.00396	0.868889	0.000223	1.02795	0.000266	6.18829e-08	4.08e-08	7.03691e-07	1.87e-09	0.00412513	3.84e-05	0.12484	0.00144	38.0427	0.54	0.00832735	5.73e-05	0.282631	3.45e-05	1.46662	5.88e-05	1.88675	9.74e-05	2.57918	0.0169	0.0729946	0.000466	0.0738768	0.000436	0.00530684	4.77e-05	5.42582e-05	3.14e-05	-0.000944652	6.86e-12	-0.00316839	0	-0.00430133	0	-0.00602037	2.87e-11	-0.00305235	1.19e-11	-0.00488173	2.61e-11
2SMST112_027_3402	2019-06-03 11:08:45	0.74492	3.74e-05	-1.49397	0.00447	0.876214	0.00361	1.02177	0.00424	-5.79428e-08	5.28e-08	2.73194e-08	1.42e-09	0.000545356	8.16e-06	0.0125648	0.000221	3.7106	0.0886	0.00876707	9.25e-05	0.282013	4.66e-05	1.46661	6.81e-05	1.88661	0.000125	2.26706	0.0101	0.00656398	0.000145	0.00885985	0.000174	0.000178127	9.35e-06	-2.4207e-05	3.52e-05	-0.000972615	0	-0.00318022	0	-0.00429254	0	-0.00603413	0	-0.00304664	1.22e-11	-0.00491832	1.32e-11
2SMST112_028_3403	2019-06-03 11:11:18	0.745094	4.16e-05	-1.51476	0.00496	0.868823	0.00223	1.02815	0.00267	-1.45094e-08	5.51e-08	1.18339e-08	1.32e-09	0.000527551	6.46e-06	0.0161803	0.000203	4.75122	0.0718	0.00866059	5.66e-05	0.28203	4.26e-05	1.46671	7.19e-05	1.88689	0.000126	2.09297	0.0116	0.00786635	0.000102	0.00805438	9.27e-05	7.28428e-05	7.91e-06	7.31953e-06	3.48e-05	-0.000963699	6.11e-12	-0.00317705	1.24e-11	-0.00427628	0	-0.00601443	0	-0.00305985	1.04e-11	-0.00491811	0
2SMST112_029_3404	2019-06-03 11:12:40	0.744876	0.000393	-1.48575	0.0469	0.868562	0.00411	1.03045	0.00515	-3.54196e-07	7.33e-07	8.02329e-07	1.99e-08	0.00288052	1.43e-05	0.0980427	0.00077	22.3649	2.97	0.00893424	0.000753	0.282582	0.000416	1.4659	0.000643	1.88674	0.00125	0.176396	0.00377	0.00405755	0.000113	0.00361962	8.94e-05	0.00041923	1.2e-05	-1.9492e-05	3.2e-05	-0.000940591	5.6e-12	-0.00319214	0	-0.00427121	7.06e-12	-0.0060312	3.57e-11	-0.00303833	0	-0.00489065	0
2SMST112_030_3405	2019-06-03 11:14:11	0.745086	3.88e-05	-1.51381	0.00463	0.865775	0.0021	1.03286	0.00251	-1.85256e-07	5.03e-08	4.56361e-08	1.51e-09	0.000605248	8.54e-07	0.017447	7.75e-05	5.1581	0.0529	0.00857218	7.43e-05	0.282565	4.49e-05	1.46673	6.78e-05	1.88661	0.000128	1.90298	0.00622	0.00748302	5.53e-05	0.00811802	3.57e-05	0.000255933	8.59e-06	-9.99705e-05	2.9e-05	-0.000943502	7.39e-12	-0.00318524	1.58e-11	-0.00429272	0	-0.00602408	1.65e-11	-0.00305644	1.95e-11	-0.00491166	0
2SMST112_031_3408	2019-06-03 11:16:17	0.745086	3.74e-05	-1.51372	0.00447	0.865581	0.00135	1.03231	0.00159	-2.51626e-08	5.14e-08	3.99104e-08	1.41e-09	0.000859634	7.72e-07	0.0234835	3.86e-05	7.01815	0.0583	0.00856088	6.05e-05	0.281995	3.62e-05	1.46656	6.35e-05	1.88648	0.000128	2.09561	0.0123	0.0110999	7.99e-05	0.0126559	7.23e-05	0.000241076	8.78e-06	-1.65827e-05	3.21e-05	-0.000927632	0	-0.00316072	2.12e-11	-0.00429416	6.43e-12	-0.00603163	2.41e-11	-0.00303653	2.04e-11	-0.00491328	0
2SMST112_032_3409	2019-06-03 11:17:04	0.745139	4.3e-05	-1.52011	0.00513	0.872209	0.000809	1.02413	0.000942	7.12416e-08	4.99e-08	2.04976e-07	1.48e-09	0.00134507	1.42e-06	0.0400771	0.000106	11.6871	0.109	0.00877871	7.31e-05	0.282589	4.05e-05	1.46656	7.33e-05	1.88623	0.00013	1.94465	0.00866	0.0176888	0.000123	0.0183971	9.78e-05	0.00115066	9.42e-06	3.42143e-05	3.02e-05	-0.000970733	4.99e-12	-0.00315796	0	-0.00426212	0	-0.0060275	0	-0.00304812	0	-0.00488451	0
2SMST112_033_3410	2019-06-03 11:17:56	0.745023	4.37e-05	-1.5062	0.00521	0.86943	0.00118	1.02761	0.0014	2.17563e-07	5.31e-08	1.34519e-07	1.43e-09	0.000988622	1.75e-06	0.0289765	3.48e-05	8.39473	0.0721	0.00877416	6.88e-05	0.282624	4.17e-05	1.4667	7.09e-05	1.88669	0.000136	1.90869	0.00753	0.0125044	5.74e-05	0.0132747	3.46e-05	0.000744085	7.87e-06	0.000122283	3.04e-05	-0.000952365	5.11e-12	-0.00315873	1.14e-11	-0.00426321	2.13e-11	-0.00603432	0	-0.00304251	6.81e-12	-0.0049025	3.66e-11
2SMST112_034_3411	2019-06-03 11:19:19	0.74519	5.66e-05	-1.52615	0.00675	0.870256	0.000556	1.02635	0.000663	6.38979e-07	7.95e-08	1.04732e-07	2.06e-09	0.00308085	1.82e-05	0.104922	0.000527	30.9773	0.492	0.00852132	0.000121	0.282561	6.78e-05	1.46695	9.67e-05	1.88692	0.000196	1.39252	0.0181	0.0325073	0.000249	0.0296718	0.000195	0.000435682	9.69e-06	0.000275331	3.28e-05	-0.000965969	0	-0.00317714	0	-0.00427822	0	-0.0060226	0	-0.00306539	2.18e-11	-0.00489009	1.54e-11
4SMST778_001_3313	2019-05-24 14:01:37	0.745108	4.75e-05	-1.51629	0.00566	0.867759	0.000484	1.0294	0.000573	-8.98762e-08	6.1e-08	2.2342e-07	1.94e-09	0.00277554	7.12e-06	0.0860035	0.00024	25.9845	0.254	0.00850172	7.37e-05	0.282672	4.76e-05	1.4666	7.32e-05	1.88666	0.000151	1.54332	0.00726	0.0300543	0.000191	0.0301793	0.000162	0.000996945	8.45e-06	-2.51712e-05	2.81e-05	-0.000948122	4.39e-12	-0.00317966	0	-0.00430887	0	-0.00604096	2.36e-11	-0.0030526	0	-0.0049049	0
4SMST778_002_3314	2019-05-24 14:03:23	0.745133	3.75e-05	-1.51936	0.00447	0.870045	0.00129	1.02649	0.00153	2.99516e-08	5.01e-08	7.99627e-08	1.26e-09	0.000746224	5.83e-07	0.020234	3.37e-05	5.86884	0.0415	0.00871008	5.37e-05	0.282616	3.31e-05	1.46661	6.26e-05	1.8866	0.000118	2.20081	0.0118	0.0100512	6.9e-05	0.0115551	6.43e-05	0.000511033	8.47e-06	3.33441e-05	3.31e-05	-0.000971604	0	-0.0031805	1.98e-11	-0.0042836	2.62e-11	-0.00604077	3.97e-11	-0.00306483	1.56e-11	-0.00491918	0
4SMST778_003_3315	2019-05-24 14:04:29	0.745078	4.39e-05	-1.51273	0.00523	0.867793	0.00287	1.02856	0.00336	2.64042e-07	7.53e-08	3.29213e-08	1.76e-09	0.000589852	3.56e-06	0.014172	6.12e-05	4.18885	0.0506	0.00860797	7.68e-05	0.281986	4.43e-05	1.46673	7.75e-05	1.88689	0.000141	1.74837	0.0216	0.00546798	5.15e-05	0.00710705	4.9e-05	0.000168589	8.76e-06	0.000146836	3.8e-05	-0.000958822	6.03e-12	-0.00319255	1.32e-11	-0.00431184	0	-0.00603971	0	-0.00306293	1.49e-11	-0.00491362	0
4SMST778_004_3316	2019-05-24 14:06:00	0.745106	4.15e-05	-1.51618	0.00495	0.868366	0.00364	1.02946	0.00429	2.38307e-08	5.13e-08	1.27366e-08	1.4e-09	0.000309781	1.55e-06	0.00822756	3.46e-05	2.39597	0.0231	0.00873463	5.99e-05	0.281898	3.76e-05	1.46649	7.53e-05	1.88655	0.000126	2.00788	0.0117	0.0037368	1.48e-05	0.004374	1.36e-05	7.59367e-05	8.16e-06	6.78807e-07	3.12e-05	-0.000975739	0	-0.00317502	0	-0.00428267	1.59e-11	-0.00603428	6.14e-12	-0.00307931	1.66e-11	-0.0048983	0
4SMST778_005_3318	2019-05-24 14:09:10	0.745179	3.61e-05	-1.5248	0.0043	0.864557	0.00311	1.03385	0.00374	1.1314e-07	4.62e-08	7.9569e-09	1.13e-09	0.000342585	2.36e-06	0.00901375	5.73e-05	2.63373	0.0245	0.00864727	5.02e-05	0.282042	3.11e-05	1.46657	5.92e-05	1.88647	0.000111	2.39873	0.0117	0.004862	1.65e-05	0.00574677	1.93e-05	5.61176e-05	7.77e-06	7.74553e-05	3.31e-05	-0.000962189	3.15e-12	-0.00319277	0	-0.00430326	0	-0.00605042	3.73e-11	-0.00308177	0	-0.00492224	0
4SMST778_006_3321	2019-05-24 14:11:14	0.745154	3.8e-05	-1.52184	0.00454	0.865909	0.00117	1.03136	0.00136	1.0868e-07	4.77e-08	2.72395e-08	1.24e-09	0.000803113	2.48e-06	0.0220158	8.06e-05	6.52109	0.0474	0.00863756	4.56e-05	0.282064	3.23e-05	1.46674	5.97e-05	1.88656	0.000123	2.25552	0.0122	0.0111464	8.23e-05	0.0126536	7.88e-05	0.000181102	8.12e-06	6.87261e-05	3.16e-05	-0.000931158	5.62e-12	-0.00318846	0	-0.00429794	4.47e-12	-0.00603235	0	-0.0030743	1.49e-11	-0.00491407	0
4SMST778_007_3322	2019-05-24 14:12:23	0.745041	4.47e-05	-1.5084	0.00533	0.868959	0.000449	1.02796	0.000532	-3.82736e-08	5.54e-08	1.21375e-07	1.55e-09	0.00251734	1.31e-06	0.0731869	6.49e-05	22.0627	0.171	0.0084651	6.21e-05	0.282552	3.91e-05	1.46642	6.92e-05	1.88657	0.000133	1.83692	0.0109	0.0303628	0.000204	0.0324922	0.000179	0.000645593	8.82e-06	-5.20784e-07	3.09e-05	-0.00100006	3.65e-12	-0.00318067	1e-11	-0.00430488	1.34e-11	-0.00603726	0	-0.00310264	0	-0.0049091	0
4SMST778_008_3323	2019-05-24 14:13:14	0.745153	2.95e-05	-1.5217	0.00351	0.869447	0.002	1.02757	0.00241	2.6648e-08	3.95e-08	1.10509e-07	1.12e-09	0.000404782	4.9e-06	0.0119454	0.000167	3.51886	0.0553	0.00868254	4.36e-05	0.282474	2.9e-05	1.46658	5.11e-05	1.88656	9.97e-05	2.85519	0.0174	0.00769098	0.000144	0.00812646	0.000135	0.000918258	1.17e-05	2.34607e-05	3.33e-05	-0.000976903	0	-0.00316662	0	-0.00428654	1.94e-11	-0.00607723	4.54e-11	-0.00310013	0	-0.00491624	1.5e-11
4SMST778_009_3324	2019-05-24 14:14:17	0.745165	3.59e-05	-1.52311	0.00429	0.870617	0.000869	1.02591	0.00102	-1.4725e-08	4.41e-08	2.46366e-07	1.25e-09	0.00122002	1.58e-06	0.0352438	2.71e-05	10.3792	0.0714	0.00858859	5.36e-05	0.282504	3.44e-05	1.46657	6.37e-05	1.88644	0.000111	2.16788	0.0106	0.0172485	8.48e-05	0.0185469	7.13e-05	0.00155932	1.16e-05	-4.17313e-06	2.87e-05	-0.000990614	2.42e-12	-0.00318828	0	-0.00429996	1.58e-11	-0.00605642	3.01e-11	-0.00310087	1.41e-11	-0.00491672	0
4SMST778_010_3325	2019-05-24 14:15:08	0.745111	2.84e-05	-1.51671	0.00339	0.871644	0.00509	1.02773	0.00616	7.45477e-08	3.57e-08	9.85092e-09	9.28e-10	0.000203954	6.4e-07	0.00490109	2.23e-05	1.4224	0.0114	0.00868137	3.77e-05	0.281913	2.8e-05	1.4666	4.82e-05	1.88675	8.95e-05	2.82966	0.0163	0.00316462	1.94e-05	0.00409837	2.25e-05	8.46578e-05	7.74e-06	5.40752e-05	3.05e-05	-0.000990692	6.46e-12	-0.00319542	2.23e-11	-0.00429426	0	-0.00606097	3.79e-11	-0.00311876	1.82e-11	-0.00492223	0
4SMST778_011_3328	2019-05-24 14:16:41	0.745106	3.62e-05	-1.5161	0.00431	0.869434	0.00192	1.02655	0.00233	1.22856e-07	4.45e-08	3.64055e-08	1.29e-09	0.000530602	1.46e-06	0.0151311	0.000101	4.48801	0.0475	0.00858384	5.67e-05	0.281964	3.61e-05	1.46652	6.72e-05	1.8865	0.000111	2.27512	0.014	0.00778582	9.56e-05	0.00848425	7.57e-05	0.000235209	8.7e-06	0.000106306	3.1e-05	-0.000990215	0	-0.0032117	0	-0.00430184	3.42e-11	-0.00605576	0	-0.003068	0	-0.004919	5.61e-12
4SMST778_012_3329	2019-05-24 14:17:44	0.74498	5.23e-05	-1.50103	0.00623	0.869629	0.000556	1.02701	0.000655	-5.941e-08	7.63e-08	1.21221e-07	2.04e-09	0.00255494	1.27e-06	0.0794236	7.75e-05	23.3821	0.227	0.00862602	7.78e-05	0.282749	4.9e-05	1.4666	8.64e-05	1.8867	0.000172	1.43813	0.00605	0.0257553	0.000132	0.0258559	0.000101	0.000504435	9e-06	-3.31229e-05	3.33e-05	-0.000984269	0	-0.00320631	0	-0.00430867	0	-0.00606036	1.79e-11	-0.00312174	1.69e-11	-0.00494605	2.93e-11
4SMST778_013_3330	2019-05-24 14:18:48	0.745122	4.55e-05	-1.51802	0.00543	0.868444	0.000653	1.02865	0.000774	5.75436e-08	5.82e-08	1.10934e-07	1.76e-09	0.00188705	1.18e-05	0.0557209	0.000294	16.6429	0.167	0.00839621	6.89e-05	0.282576	4.73e-05	1.46666	7.08e-05	1.88644	0.000143	1.74936	0.0144	0.0216248	6.74e-05	0.0227994	4.78e-05	0.000566725	1.01e-05	4.36993e-05	3.09e-05	-0.000979289	0	-0.00319924	0	-0.00430978	0	-0.00604186	0	-0.00307014	0	-0.00492574	1.96e-11
4SMST778_014_3331	2019-05-24 14:19:50	0.745136	4.62e-05	-1.51976	0.00551	0.871723	0.00175	1.02439	0.00201	-3.53123e-08	6.6e-08	1.24197e-07	1.99e-09	0.000819765	4.62e-06	0.0226423	8.8e-05	6.69852	0.0727	0.00857659	7.14e-05	0.282544	4.79e-05	1.46701	8.16e-05	1.88679	0.000159	1.6983	0.0282	0.00863802	0.000123	0.00973905	0.000114	0.000620944	1.52e-05	-1.20175e-05	3.11e-05	-0.000982165	5.58e-12	-0.00318618	0	-0.00430647	0	-0.00604159	0	-0.00308924	0	-0.00492225	1.46e-11
4SMST778_015_3332	2019-05-24 14:21:10	0.745161	3.68e-05	-1.52263	0.00439	0.870168	0.00149	1.02649	0.00174	1.91902e-08	3.83e-08	1.06542e-07	1.03e-09	0.000565841	2.17e-06	0.0154245	4.84e-05	4.51644	0.0323	0.00871175	4.11e-05	0.282402	3.33e-05	1.46665	6.43e-05	1.8867	0.00011	2.71032	0.0191	0.00931664	4.19e-05	0.0106887	3.68e-05	0.000841537	1.09e-05	-1.87428e-06	3.14e-05	-0.000966286	3.26e-12	-0.00317942	0	-0.00429502	0	-0.00603769	0	-0.00308263	1.77e-11	-0.00490352	0
4SMST778_016_3336	2019-05-24 14:24:09	0.744838	4.5e-05	-1.48422	0.00537	0.867628	0.000988	1.02916	0.00119	6.45223e-08	6.24e-08	2.21647e-07	4.17e-09	0.00139311	2.33e-06	0.0392446	0.000102	11.897	0.114	0.00843053	7.22e-05	0.282422	4.43e-05	1.46684	8.24e-05	1.88712	0.000149	1.70021	0.0107	0.0150274	0.000105	0.0166252	0.000108	0.00111411	2.69e-05	4.31837e-05	3.19e-05	-0.000968307	6.47e-12	-0.00319496	0	-0.00431682	0	-0.00603028	3.2e-11	-0.00308678	0	-0.00493712	0
4SMST778_017_3337	2019-05-24 14:26:41	0.745042	3.94e-05	-1.50851	0.0047	0.870066	0.000713	1.02653	0.000842	8.63189e-08	5.46e-08	2.12212e-07	1.64e-09	0.0015376	2.01e-06	0.0442366	3.36e-05	13.0239	0.0865	0.00859002	5.37e-05	0.282547	3.65e-05	1.46665	6.25e-05	1.88672	0.000128	2.00488	0.0164	0.0200203	0.000173	0.0216836	0.000151	0.00124844	1.64e-05	6.21653e-05	3.24e-05	-0.000974924	0	-0.00319222	1.87e-11	-0.00428467	0	-0.0060298	2.25e-11	-0.00306638	0	-0.00491832	0
4SMST778_018_3338	2019-05-24 14:27:25	0.745007	4.31e-05	-1.50431	0.00514	0.866573	0.000868	1.03081	0.00102	-1.92658e-08	6.62e-08	1.40118e-07	2.04e-09	0.00144874	5.3e-06	0.0409731	0.000129	12.6909	0.146	0.00844127	6.8e-05	0.282489	4.42e-05	1.46696	8.08e-05	1.88724	0.000148	1.767	0.0271	0.0157073	0.000213	0.0172538	0.000211	0.000714972	1.37e-05	2.55454e-06	3.58e-05	-0.000962801	4.37e-12	-0.00316791	0	-0.00430526	1.7e-11	-0.00603644	0	-0.00304646	1.94e-11	-0.00492346	2.39e-11
4SMST778_019_3339	2019-05-24 14:28:14	0.74509	4.74e-05	-1.51419	0.00566	0.869619	0.000561	1.02692	0.000649	-3.01044e-08	7.32e-08	1.73184e-07	2.21e-09	0.00264322	1.61e-06	0.0781736	0.000145	22.9287	0.232	0.00859391	8.26e-05	0.282716	5.63e-05	1.46651	9.15e-05	1.88646	0.000163	1.4357	0.0117	0.0254117	0.00025	0.026672	0.000219	0.000720478	1.08e-05	-5.89711e-06	3.08e-05	-0.000969339	0	-0.00317321	2.39e-11	-0.00429152	2.12e-11	-0.00604061	3.83e-11	-0.00309644	0	-0.00494602	2.09e-11
4SMST778_020_3340	2019-05-24 14:31:02	0.74486	0.000112	-1.48657	0.0133	0.867016	0.00238	1.02994	0.00277	6.91118e-07	2.27e-07	1.23007e-07	5.52e-09	0.00172122	1.76e-05	0.0470882	0.000455	14.3149	0.356	0.00834726	0.000217	0.282446	0.000124	1.46722	0.000227	1.88656	0.000418	0.751622	0.0265	0.00771983	0.000222	0.00873205	0.000247	0.000268346	1.27e-05	0.00013553	3.08e-05	-0.00097191	0	-0.0031956	2.25e-11	-0.00430563	1.46e-11	-0.00604166	3.39e-11	-0.00308509	1.42e-11	-0.00492174	0
4SMST778_021_3344	2019-05-24 14:33:21	0.745179	3.49e-05	-1.52482	0.00416	0.866205	0.00128	1.03106	0.0015	-2.71605e-08	5.53e-08	1.51454e-07	1.92e-09	0.000914313	3.75e-06	0.0254056	0.000123	7.59976	0.0757	0.00855273	6.6e-05	0.282573	4.02e-05	1.46688	7.39e-05	1.88667	0.000123	2.01214	0.0156	0.0116596	0.000116	0.0130059	0.000103	0.000889683	1.05e-05	-7.53825e-06	3.32e-05	-0.000960706	1.64e-12	-0.00319188	1.45e-11	-0.00432475	0	-0.00604434	0	-0.00310478	2.09e-11	-0.00494206	0
4SMST778_022_3345	2019-05-24 14:34:17	0.744988	4.06e-05	-1.50202	0.00484	0.86843	0.00153	1.0287	0.00181	4.52608e-08	6.2e-08	8.06749e-08	1.79e-09	0.00110384	1.71e-05	0.031652	0.000594	9.40982	0.207	0.00864057	7.51e-05	0.282662	4.45e-05	1.46696	6.64e-05	1.88722	0.000134	1.70888	0.0159	0.0130302	0.000372	0.0140515	0.000353	0.000395635	9.26e-06	2.59763e-05	3.3e-05	-0.000959788	0	-0.00316443	0	-0.00429693	1.98e-11	-0.00603196	0	-0.00307988	0	-0.00493156	0
4SMST778_023_3346	2019-05-24 14:36:22	0.745048	4.06e-05	-1.5092	0.00485	0.869252	0.000639	1.02741	0.000774	2.09424e-07	6.4e-08	3.12153e-07	1.92e-09	0.00226694	1.54e-05	0.0696443	0.000395	19.8118	0.213	0.00867411	9.51e-05	0.282643	5.44e-05	1.46684	8.09e-05	1.8865	0.000143	1.71458	0.00799	0.0268024	4.69e-05	0.0271852	6.98e-05	0.00155251	9.62e-06	0.000102462	3.27e-05	-0.000985852	0	-0.0031852	0	-0.0043162	0	-0.00606254	0	-0.00309139	0	-0.00492611	0
4SMST778_024_3347	2019-05-24 14:41:17	0.744974	4.26e-05	-1.50042	0.00508	0.867863	0.00132	1.02926	0.00156	-1.24634e-07	5.38e-08	1.63214e-07	1.59e-09	0.000930579	3.32e-06	0.0280925	0.000183	8.47039	0.108	0.00858004	8.68e-05	0.282439	5.03e-05	1.46674	6.72e-05	1.88702	0.000138	1.88101	0.0122	0.0118379	0.000146	0.0122209	0.000116	0.000875423	1.13e-05	-7.27205e-05	3.03e-05	-0.000964021	0	-0.00317491	0	-0.00434107	0	-0.00603283	4.64e-12	-0.00308946	1.28e-11	-0.00490222	0
4SMST778_025_3348	2019-05-24 14:42:57	0.744921	5.3e-05	-1.49407	0.00632	0.870597	0.0016	1.02672	0.00189	1.50694e-07	8.91e-08	1.3866e-07	2.47e-09	0.00127632	1e-05	0.0389955	0.000443	11.2488	0.206	0.00888497	0.000105	0.282622	6.13e-05	1.46638	8.72e-05	1.88669	0.000182	1.44048	0.00281	0.0126297	0.000164	0.0128743	0.000124	0.000578507	1.09e-05	6.13292e-05	3.82e-05	-0.000984225	5.55e-12	-0.00318773	0	-0.00430502	0	-0.00606017	3.74e-11	-0.00310952	1.48e-11	-0.00494429	0
4SMST778_026_3351	2019-05-24 14:43:52	0.744927	5.58e-05	-1.4948	0.00666	0.868797	0.00163	1.02868	0.00191	-1.76428e-07	8.99e-08	3.4935e-08	2.35e-09	0.00107067	8.98e-06	0.0319125	0.000357	9.38836	0.169	0.00885202	0.0001	0.282031	6.28e-05	1.46645	8.47e-05	1.88661	0.00017	1.26813	0.0077	0.00929284	0.000148	0.00966818	0.000122	0.000128044	8.57e-06	-7.02778e-05	3.46e-05	-0.000983408	0	-0.00320081	2.11e-11	-0.00430246	0	-0.00605901	1.61e-11	-0.00308943	0	-0.00492891	2.33e-11
4SMST778_027_3352	2019-05-24 14:46:13	0.74513	4.09e-05	-1.51897	0.00488	0.867953	0.00112	1.0295	0.00133	1.44786e-08	5.06e-08	9.30823e-08	1.59e-09	0.000993179	2.85e-06	0.0290382	4.66e-05	8.68492	0.0698	0.00843311	6.31e-05	0.282477	4.05e-05	1.46662	7.6e-05	1.88657	0.000132	2.07809	0.0152	0.0136251	8.22e-05	0.0144982	6.71e-05	0.000563829	1.15e-05	5.20316e-06	3.15e-05	-0.000994957	5.84e-12	-0.00318511	0	-0.00433096	1.17e-11	-0.00604063	3.39e-11	-0.00310002	0	-0.00493061	9.25e-12
4SMST778_028_3353	2019-05-24 14:47:04	0.74514	4.95e-05	-1.52019	0.0059	0.869884	0.000886	1.02665	0.00105	-8.58054e-08	6.42e-08	1.36649e-07	1.92e-09	0.00170824	6.16e-06	0.0488913	8.85e-05	14.5501	0.143	0.00851774	7.43e-05	0.282643	4.9e-05	1.4668	7.64e-05	1.88661	0.000156	1.64741	0.0101	0.0181703	7.67e-05	0.0197913	4.65e-05	0.000655921	8.87e-06	-2.29896e-05	3.23e-05	-0.000999474	0	-0.00318699	0	-0.00430103	0	-0.00603589	0	-0.0030988	1.93e-11	-0.0049404	2.85e-11
4SMST778_029_3354	2019-05-24 14:48:57	0.745011	3.48e-05	-1.50481	0.00416	0.867129	0.000892	1.03003	0.00106	-9.83737e-08	5.27e-08	3.76472e-07	1.49e-09	0.00121913	4.47e-06	0.0357755	0.000101	10.6881	0.0934	0.0084531	6.03e-05	0.282525	3.71e-05	1.46673	6.6e-05	1.88682	0.000124	2.0442	0.0136	0.0163674	6.69e-05	0.0174398	5.95e-05	0.00222967	1.57e-05	-5.80142e-05	3.17e-05	-0.000971346	6.66e-12	-0.00318979	0	-0.00431381	0	-0.0060289	0	-0.00308985	0	-0.00492149	0
4SMST778_030_3355	2019-05-24 14:49:51	0.745045	3.79e-05	-1.50886	0.00452	0.869691	0.00102	1.02703	0.00119	-3.95821e-09	5.21e-08	4.68648e-08	1.58e-09	0.00105315	3.28e-06	0.0287078	0.000121	8.27783	0.0779	0.00873682	6.34e-05	0.281973	3.64e-05	1.46654	6.06e-05	1.88684	0.000117	2.15742	0.0163	0.0138654	0.000128	0.0157735	0.000119	0.000291877	1.1e-05	3.07464e-06	3.4e-05	-0.000977339	0	-0.00317483	1.1e-11	-0.00430546	0	-0.00604885	0	-0.00308383	5.22e-12	-0.00493179	2.52e-11
4SMST778_031_3358	2019-05-24 14:50:46	0.745064	4.04e-05	-1.5111	0.00482	0.869597	0.00134	1.02706	0.00157	1.51111e-07	6.12e-08	1.67163e-07	1.76e-09	0.000902657	3.79e-06	0.0251572	0.000114	7.4476	0.0787	0.00865482	6.78e-05	0.282466	4.25e-05	1.46668	6.83e-05	1.88656	0.000141	1.83917	0.014	0.0100634	4.24e-05	0.0113025	3.89e-05	0.000888353	1.32e-05	9.1795e-05	3.38e-05	-0.000979282	0	-0.00319198	8.69e-12	-0.00432097	0	-0.00604419	3.52e-11	-0.00308385	0	-0.00493888	3.11e-11
4SMST778_032_3359	2019-05-24 14:51:39	0.744957	3.77e-05	-1.49904	0.00453	0.870474	0.000878	1.02636	0.00104	4.16529e-08	4.68e-08	3.04755e-07	1.31e-09	0.00107433	6.63e-07	0.0324295	5.49e-05	9.64452	0.0702	0.00856559	5.17e-05	0.282526	3.38e-05	1.46646	6.34e-05	1.88687	0.000117	2.27165	0.00909	0.016635	9.15e-05	0.0171825	7.4e-05	0.00200781	1.17e-05	4.20053e-05	3.21e-05	-0.000985019	0	-0.00320326	0	-0.00430461	0	-0.00603682	0	-0.00310684	0	-0.00494709	0
4SMST778_033_3360	2019-05-24 14:52:33	0.745169	2.92e-05	-1.52362	0.00348	0.870329	0.00181	1.02648	0.00213	5.60436e-08	4.05e-08	3.9435e-08	1.17e-09	0.000566075	1.39e-06	0.0147262	3.24e-05	4.32866	0.0293	0.00862577	4.59e-05	0.282031	3.22e-05	1.46662	5.47e-05	1.88642	0.00011	2.53764	0.0171	0.0085197	4.92e-05	0.0102399	4.7e-05	0.000295619	9.26e-06	2.59894e-05	3.12e-05	-0.00100149	6.17e-12	-0.00319735	1.02e-11	-0.00432061	0	-0.00606441	3.97e-11	-0.00309384	0	-0.00493435	0
4SMST778_034_3361	2019-05-24 14:53:15	0.74515	3.31e-05	-1.5214	0.00395	0.868515	0.00279	1.02837	0.00334	-1.41444e-08	4.31e-08	1.08456e-08	1.01e-09	0.000382552	8.58e-06	0.00960757	0.000238	2.82229	0.0716	0.00868066	3.89e-05	0.282034	2.91e-05	1.4667	5.8e-05	1.88689	0.000107	2.77551	0.0187	0.00621182	0.00019	0.00768649	0.000218	8.74117e-05	8.27e-06	-7.43714e-06	3.6e-05	-0.000967329	5.56e-12	-0.00318337	1.51e-11	-0.00429559	1.48e-11	-0.0060346	3.84e-11	-0.00308297	1.78e-11	-0.00494215	2.72e-11
4SMST778_035_3362	2019-05-24 14:56:15	0.745152	3.95e-05	-1.52158	0.00471	0.871498	0.00195	1.02411	0.00223	8.61662e-08	5.01e-08	1.64968e-07	1.66e-09	0.000658736	3.54e-06	0.0181928	0.000129	5.35983	0.0646	0.00872541	6.74e-05	0.282514	3.66e-05	1.46673	6.11e-05	1.88637	0.00014	1.93233	0.011	0.00797641	0.000101	0.00899465	9.83e-05	0.000923158	1.15e-05	4.49382e-05	2.92e-05	-0.000976432	0	-0.00318864	2.24e-11	-0.00430825	8.47e-12	-0.00604892	0	-0.00308852	0	-0.00490947	3.78e-11
4SMST778_036_3363	2019-05-24 15:18:17	0.745014	3.24e-05	-1.50521	0.00386	0.869328	0.000828	1.02744	0.000988	-1.72474e-08	4.28e-08	7.92126e-08	1.3e-09	0.00111856	3.43e-06	0.0340424	7.04e-05	9.96513	0.0654	0.00859919	5.12e-05	0.282525	3.35e-05	1.4667	6.11e-05	1.88702	0.000106	2.39677	0.0149	0.0184353	8.88e-05	0.0188605	6.91e-05	0.000550762	9.06e-06	-2.94318e-05	3.1e-05	-0.00096839	4.5e-12	-0.00317492	0	-0.0042713	1.94e-11	-0.00602433	3.6e-11	-0.00306094	9.13e-12	-0.00492517	3.03e-11
FC1_3302	2019-04-22 14:20:42	0.745118	3.32e-05	-1.51758	0.00396	0.869811	0.00121	1.02688	0.00141	1.36444e-07	4.02e-08	1.45575e-08	1.14e-09	0.000587885	3.23e-06	0.0182612	0.000101	5.33877	0.0412	0.00864276	4.08e-05	0.282168	2.87e-05	1.46652	5.53e-05	1.88675	0.000108	2.45372	0.0127	0.00998124	6.68e-05	0.010033	5.48e-05	0.000106204	8.14e-06	9.45666e-05	2.99e-05	-0.000938894	0	-0.00313658	0	-0.00425515	2.59e-11	-0.0060078	0	-0.00302757	1.33e-11	-0.00487433	3.17e-11
FC10_3364	2019-04-22 14:50:10	0.745093	3.66e-05	-1.51459	0.00437	0.870913	0.00122	1.02587	0.00143	1.6546e-07	4.42e-08	1.4821e-08	1.31e-09	0.0006377	3.03e-06	0.0215559	0.00019	6.23776	0.0639	0.00872919	4.52e-05	0.282231	3.21e-05	1.46679	6.31e-05	1.88711	0.000118	2.3258	0.00904	0.0113403	0.000141	0.010413	8.78e-05	0.000100082	8.79e-06	0.000101874	3.07e-05	-0.000994221	4.82e-12	-0.00318635	2.39e-11	-0.00430824	4.3e-12	-0.00604659	3.23e-11	-0.00309917	1.79e-11	-0.00492977	0
FC10b_3365	2019-04-22 14:52:30	0.745067	3.62e-05	-1.51152	0.00432	0.871108	0.000925	1.02566	0.00109	8.41542e-08	4.81e-08	1.42714e-08	1.16e-09	0.000846726	6.43e-07	0.0288475	9.37e-05	8.51821	0.0605	0.00857283	4.97e-05	0.282253	3.19e-05	1.46656	5.93e-05	1.88686	0.000108	2.25642	0.00735	0.0146841	9.25e-05	0.0134772	4.02e-05	8.9744e-05	7.45e-06	5.3321e-05	3.28e-05	-0.000989382	0	-0.00318516	0	-0.00428722	0	-0.00602409	3.83e-11	-0.00310941	1.99e-11	-0.00493625	0
FC11overwrite_3372	2019-04-22 14:54:24	0.745111	3.91e-05	-1.51669	0.00466	0.868798	0.00101	1.02843	0.0012	5.2397e-08	4.57e-08	1.88643e-08	1.24e-09	0.000820374	6.6e-07	0.0274835	7.26e-05	8.11205	0.0601	0.00861639	5.52e-05	0.282073	3.91e-05	1.4667	6.3e-05	1.88693	0.000114	2.17759	0.00874	0.0135527	8.41e-05	0.01257	4.72e-05	0.000123007	8.16e-06	2.31965e-05	3.01e-05	-0.000977209	5.88e-12	-0.00318244	0	-0.00430211	2.7e-11	-0.00603211	2.52e-11	-0.0030965	2.48e-11	-0.00489824	0
FC12_3379	2019-05-24 15:15:03	0.745208	3.65e-05	-1.52829	0.00435	0.869437	0.00124	1.02716	0.00146	-5.18752e-08	4.99e-08	1.67048e-08	1.39e-09	0.000755869	6.53e-07	0.0249467	7.29e-05	7.3234	0.0693	0.00864222	7.11e-05	0.282194	4.13e-05	1.46671	5.85e-05	1.88671	0.000114	2.12424	0.0077	0.0119822	7.63e-05	0.0112999	3.67e-05	0.000102634	8.6e-06	-4.30025e-05	3.2e-05	-0.000952743	0	-0.00316222	1.07e-11	-0.00429255	3.19e-11	-0.00604299	3.86e-11	-0.00306399	0	-0.00489503	0
FC13_3386	2019-04-22 14:57:39	0.745208	3.9e-05	-1.5283	0.00465	0.871413	0.00151	1.02463	0.00174	-1.67714e-07	4.8e-08	1.45349e-08	1.42e-09	0.000707714	6.34e-07	0.0231015	6.52e-05	6.80159	0.0601	0.00861713	6.68e-05	0.282104	4.01e-05	1.46643	7.26e-05	1.88655	0.000126	2.133	0.00855	0.0110972	7.12e-05	0.0106163	4.27e-05	8.9969e-05	8.64e-06	-0.000109355	3.07e-05	-0.00100593	0	-0.00319427	2.29e-11	-0.00429736	1.5e-11	-0.00604027	0	-0.00306702	0	-0.0049051	1.16e-11
FC14_3393	2019-04-22 14:59:55	0.745206	3.74e-05	-1.52809	0.00446	0.87065	0.00142	1.02636	0.00169	-7.55424e-08	5.23e-08	1.68984e-08	1.4e-09	0.000633552	2.48e-06	0.0206454	0.000131	5.96611	0.0515	0.00872836	5.29e-05	0.282239	3.54e-05	1.46663	6.55e-05	1.88659	0.00012	2.11324	0.00859	0.00988307	9.92e-05	0.0094219	7.34e-05	0.000100551	8.59e-06	-4.56247e-05	3.35e-05	-0.000963048	0	-0.00319344	0	-0.00427545	0	-0.00604644	0	-0.00304336	0	-0.0049225	1.76e-11
FC15_3400	2019-04-22 15:01:38	0.745125	3.62e-05	-1.51838	0.00432	0.866579	0.00205	1.03187	0.00245	1.19205e-07	4.88e-08	2.41382e-08	1.38e-09	0.000481149	1.57e-06	0.0151164	2.57e-05	4.47117	0.0356	0.00857361	5.34e-05	0.28207	3.61e-05	1.46658	6.57e-05	1.88656	0.000114	2.13161	0.0117	0.00724248	3.98e-05	0.00720554	2.29e-05	0.000150338	8.57e-06	8.29494e-05	3.13e-05	-0.000949211	7.34e-12	-0.00315978	2.63e-11	-0.00427743	0	-0.00601311	2.1e-11	-0.00303885	0	-0.00487531	0
FC16_3407	2019-04-22 15:06:43	0.745003	3.69e-05	-1.50379	0.0044	0.870679	0.00237	1.02737	0.00277	-1.02027e-07	4.64e-08	1.45993e-08	1.3e-09	0.000360915	1.25e-06	0.011308	6.9e-05	3.30879	0.0293	0.00862147	4.95e-05	0.282222	3.29e-05	1.4668	5.97e-05	1.88699	0.000114	2.22544	0.0123	0.00574046	6.58e-05	0.00570409	5.02e-05	9.80075e-05	8.62e-06	-7.34524e-05	3.21e-05	-0.000953809	3.78e-12	-0.00315272	2.18e-11	-0.00427866	9.29e-12	-0.00602895	0	-0.00306028	1.26e-11	-0.00492401	2.12e-11
FC17_3414	2019-04-22 15:09:01	0.745119	3.7e-05	-1.51773	0.00441	0.871443	0.00259	1.0251	0.00302	1.3903e-07	4.85e-08	2.28518e-08	1.37e-09	0.000342011	9.06e-07	0.0104809	2.19e-05	3.08225	0.0257	0.00860313	5.47e-05	0.282177	3.07e-05	1.46646	5.77e-05	1.88656	0.00012	2.17235	0.00997	0.00509101	2.33e-05	0.00520416	1.75e-05	0.000144647	8.6e-06	9.58551e-05	3.2e-05	-0.000955052	4.31e-12	-0.00319141	8.73e-12	-0.00428901	1.26e-11	-0.00604183	0	-0.00306272	0	-0.00492084	0
FC18_3421	2019-04-22 15:11:40	0.745087	3.25e-05	-1.51388	0.00388	0.868924	0.00237	1.02837	0.00279	-1.84948e-08	4.34e-08	1.10077e-08	1.14e-09	0.000353121	8.08e-07	0.0104421	1.6e-05	3.07158	0.0199	0.00856929	4.37e-05	0.282145	3.18e-05	1.46667	4.99e-05	1.88665	0.000104	2.52646	0.00954	0.00595108	2.36e-05	0.00628289	1.73e-05	8.74216e-05	8.62e-06	-1.28283e-05	3.29e-05	-0.000959015	3.74e-12	-0.00319492	1.33e-11	-0.00427926	0	-0.00602428	1.31e-11	-0.00305916	0	-0.00490165	2.36e-11
FC19_3428	2019-04-22 15:13:25	0.745017	3.74e-05	-1.5055	0.00446	0.869795	0.00151	1.02664	0.00178	-3.14158e-08	5.43e-08	1.67251e-08	1.28e-09	0.000621618	7.03e-07	0.0202736	4.76e-05	5.94141	0.0482	0.00868469	5.76e-05	0.282125	3.82e-05	1.46671	6.42e-05	1.88664	0.000125	2.06624	0.00737	0.00945599	5.64e-05	0.00901807	2.88e-05	9.73078e-05	7.58e-06	-2.45668e-05	3.36e-05	-0.000941299	5.25e-12	-0.00318474	0	-0.00426922	0	-0.00603331	0	-0.00305552	1.62e-11	-0.00491288	3.44e-11
FC2_3305	2019-04-22 14:25:17	0.74518	3.29e-05	-1.52493	0.00393	0.869235	0.00272	1.02721	0.00317	-2.36954e-08	3.95e-08	1.46604e-08	1.18e-09	0.000301791	3.15e-06	0.00924205	9.35e-05	2.72915	0.0375	0.00870021	4.61e-05	0.282199	2.88e-05	1.46667	6.18e-05	1.88663	0.000109	2.49618	0.00888	0.0053262	5.65e-05	0.00537722	5.33e-05	0.000108561	8.64e-06	-1.43484e-05	3.01e-05	-0.000941813	9.72e-13	-0.00316835	1.9e-11	-0.00427818	0	-0.00605135	3.8e-11	-0.00304961	0	-0.00488345	0
FC20_3435	2019-04-22 15:18:58	0.745052	3.91e-05	-1.50968	0.00466	0.871075	0.00149	1.02517	0.00177	-1.33376e-07	4.93e-08	1.83452e-08	1.34e-09	0.000609618	6.88e-07	0.0197117	3.79e-05	5.7313	0.04	0.00871044	5.07e-05	0.282194	3.72e-05	1.46664	5.69e-05	1.88669	0.000122	2.08167	0.0114	0.00928195	6.65e-05	0.00894263	4.47e-05	0.000114387	8.07e-06	-8.18069e-05	3.07e-05	-0.000924673	0	-0.00315903	2.63e-11	-0.00428125	0	-0.00602123	0	-0.00306662	1.82e-11	-0.00488398	0
FC21_3449	2019-04-22 15:20:29	0.744988	3.77e-05	-1.50202	0.00449	0.869693	0.00123	1.02715	0.00145	2.00702e-07	5.29e-08	3.4756e-08	1.46e-09	0.000756542	1.22e-06	0.0254171	7.97e-05	7.36598	0.059	0.00863011	5.4e-05	0.282229	3.62e-05	1.4668	5.86e-05	1.88696	0.000122	2.10495	0.012	0.012061	0.000106	0.011211	7.96e-05	0.000213746	9.07e-06	0.00012289	3.28e-05	-0.000942906	0	-0.00315206	1.12e-11	-0.00426509	2.02e-11	-0.00602925	4.82e-11	-0.0030386	0	-0.0048995	3.44e-11
FC22_3459	2019-04-22 15:21:34	0.74505	3.31e-05	-1.50951	0.00395	0.867516	0.00139	1.02981	0.00165	-1.29332e-08	4.34e-08	2.97296e-08	1.23e-09	0.000598998	4.79e-07	0.0188142	4.16e-05	5.47012	0.0344	0.00870203	4.51e-05	0.282174	3.21e-05	1.46666	5.31e-05	1.88669	0.000105	2.35227	0.0135	0.0100036	7.78e-05	0.00991139	5.76e-05	0.000205936	8.59e-06	-9.05807e-06	3.08e-05	-0.000933743	0	-0.00316864	1.83e-11	-0.00427391	0	-0.00602857	2.48e-11	-0.0030329	3.14e-12	-0.00487852	0
FC23_3459	2019-04-22 15:23:10	0.745099	3.62e-05	-1.5153	0.00432	0.869516	0.0015	1.02777	0.00177	3.34623e-08	4.45e-08	2.31051e-08	1.14e-09	0.000550136	5.41e-07	0.0170461	3.69e-05	5.00129	0.0362	0.00860217	5.37e-05	0.282164	3.19e-05	1.4667	6.31e-05	1.88657	0.000114	2.29692	0.0166	0.00887051	8.16e-05	0.00889137	6.57e-05	0.000154062	7.66e-06	3.80526e-05	3.07e-05	-0.000947967	4.53e-12	-0.00316191	0	-0.00428007	2.97e-12	-0.00603015	1.85e-11	-0.00304103	0	-0.00490918	3.25e-11
FC25_3466	2019-04-22 15:25:36	0.745066	3.57e-05	-1.51132	0.00426	0.868871	0.00145	1.02873	0.00172	5.66651e-08	5.25e-08	1.59175e-08	1.34e-09	0.000608294	7.49e-07	0.0190951	5.24e-05	5.51974	0.0404	0.00874171	5.07e-05	0.282194	3.66e-05	1.46659	6.01e-05	1.88649	0.000121	2.11314	0.0133	0.00914726	8.1e-05	0.0090438	5.24e-05	9.95539e-05	8.29e-06	1.50545e-05	3.39e-05	-0.00095644	0	-0.00314567	0	-0.00426436	2.14e-11	-0.00602498	3.05e-11	-0.00306039	0	-0.00491481	0
FC26_3473	2019-04-22 15:26:44	0.744961	3.74e-05	-1.49884	0.00446	0.868391	0.00147	1.0286	0.00173	-3.78607e-08	4.78e-08	1.41572e-08	1.32e-09	0.000632758	7.96e-07	0.020579	5.5e-05	6.00096	0.0455	0.00860622	5.49e-05	0.282197	3.39e-05	1.4666	6.33e-05	1.88651	0.000115	2.11122	0.0106	0.00981119	7.33e-05	0.00943022	4.55e-05	8.48252e-05	7.98e-06	-4.02977e-05	2.97e-05	-0.000932279	0	-0.00314509	0	-0.00426435	0	-0.00603302	3.4e-11	-0.00305408	0	-0.00491281	0
FC28_3489	2019-04-22 15:28:42	0.745076	3.54e-05	-1.51259	0.00422	0.869571	0.00148	1.0262	0.00172	-1.68993e-07	4.86e-08	2.02808e-08	1.25e-09	0.000625751	9.84e-07	0.0203942	3.78e-05	6.06206	0.0431	0.0085381	5.12e-05	0.282167	3.54e-05	1.46657	6.44e-05	1.88619	0.000113	2.13258	0.00739	0.0098471	4.87e-05	0.00936441	2.48e-05	0.000126249	7.72e-06	-0.000103032	3.07e-05	-0.000935481	0	-0.00314906	1.81e-11	-0.00426169	2.4e-11	-0.00599536	1.32e-11	-0.00302325	1.81e-11	-0.00488216	2.3e-11
FC29_3496	2019-04-22 15:30:07	0.744924	3.7e-05	-1.49438	0.00441	0.869422	0.00138	1.02778	0.00161	6.53651e-08	5.12e-08	1.89216e-08	1.3e-09	0.000671726	1.6e-06	0.0209902	2.03e-05	6.18136	0.0407	0.00855279	4.87e-05	0.282079	3.26e-05	1.46647	6e-05	1.88666	0.000119	2.14156	0.00954	0.010146	4.75e-05	0.0101155	2.43e-05	0.000117793	8.08e-06	4.16355e-05	3.28e-05	-0.000930242	0	-0.0031505	1.93e-11	-0.00426715	2.18e-11	-0.00601228	4.19e-11	-0.00305168	0	-0.00488635	5.35e-12
FC3_3312	2019-04-22 14:28:55	0.745066	3.48e-05	-1.51131	0.00416	0.870182	0.000926	1.02626	0.00108	8.02395e-08	3.93e-08	1.88538e-08	1.08e-09	0.000842661	8.91e-07	0.0270711	3.75e-05	7.95707	0.0477	0.00859777	4.37e-05	0.282053	2.84e-05	1.46668	5.56e-05	1.88688	0.000111	2.48538	0.0124	0.0151918	9.4e-05	0.0147021	6.13e-05	0.00013812	7.52e-06	5.87922e-05	2.92e-05	-0.000986311	3.81e-12	-0.0031726	0	-0.00427093	0	-0.00603366	4.91e-11	-0.00307972	0	-0.00489933	0
FC30_3509	2019-04-22 15:33:04	0.744892	4.19e-05	-1.4913	0.00503	0.868617	0.00147	1.02879	0.00174	5.15312e-08	4.96e-08	1.83692e-08	1.46e-09	0.000678215	9.52e-07	0.0208337	5.94e-05	6.12606	0.0478	0.00859287	5.45e-05	0.282146	3.83e-05	1.4668	6.29e-05	1.88696	0.000133	2.04759	0.0103	0.00962334	7.38e-05	0.00975005	5.8e-05	0.000112552	8.46e-06	2.47616e-05	3.01e-05	-0.000919484	5.84e-12	-0.00314711	1.87e-11	-0.00423603	0	-0.0059937	0	-0.00302605	0	-0.0048773	1.52e-11
FC31_3516	2019-04-22 15:34:31	0.744983	3.78e-05	-1.50144	0.00451	0.86845	0.00129	1.02841	0.00154	-9.77763e-09	5e-08	1.68858e-08	1.33e-09	0.00066933	8.94e-07	0.0220576	2.87e-05	6.527	0.0483	0.00852139	5.68e-05	0.282164	3.5e-05	1.46679	6.06e-05	1.88641	0.000118	2.09702	0.0105	0.0104284	5.08e-05	0.00986314	3.98e-05	0.000103973	8.01e-06	-6.29372e-06	3.2e-05	-0.00093859	3.59e-12	-0.00313753	2.09e-11	-0.00426299	1.89e-11	-0.0060106	0	-0.00302535	5.7e-12	-0.00489187	1.45e-11
FC32_3523	2019-04-22 15:36:53	0.744889	3.74e-05	-1.49026	0.00446	0.871259	0.00116	1.02543	0.00135	7.58244e-08	5.19e-08	2.31937e-08	1.31e-09	0.000805891	2.07e-06	0.0253152	5.5e-05	7.53554	0.0614	0.00851973	5.94e-05	0.282128	3.97e-05	1.46645	7.2e-05	1.88647	0.000119	1.96959	0.0118	0.0113358	4.61e-05	0.0112714	4.04e-05	0.000128433	7.41e-06	5.80796e-05	3.11e-05	-0.0009422	0	-0.0031481	0	-0.00425722	0	-0.00600395	4.32e-11	-0.00304057	0	-0.00487733	3.09e-11
FC33_3530	2019-04-22 15:38:10	0.744865	3.99e-05	-1.48742	0.00475	0.86933	0.000601	1.02758	0.000709	3.19672e-08	5.79e-08	2.95631e-08	1.52e-09	0.00157055	2.16e-05	0.0507951	0.000592	14.7409	0.207	0.00872856	5.83e-05	0.28226	3.78e-05	1.46672	6.72e-05	1.88692	0.000128	1.96981	0.0153	0.022151	0.000188	0.0212439	0.000207	0.000171738	8.49e-06	4.15421e-06	3.47e-05	-0.000934959	0	-0.0031501	0	-0.00424174	2.07e-11	-0.00604988	1.64e-11	-0.00304759	0	-0.00490143	4.34e-11
FC34_3539	2019-04-22 15:39:17	0.744853	3.85e-05	-1.48596	0.00459	0.867536	0.00113	1.02964	0.00133	1.72771e-07	5.41e-08	2.07847e-08	1.31e-09	0.000853752	3.49e-06	0.0280326	0.000192	8.33836	0.0818	0.00849544	5.02e-05	0.282141	3.84e-05	1.46673	6.78e-05	1.88691	0.000111	2.07194	0.0105	0.0131803	0.000155	0.0124714	0.000112	0.000121469	7.76e-06	0.000113742	3.33e-05	-0.000924542	0	-0.00313342	0	-0.00425178	0	-0.00601735	3.32e-11	-0.00302637	0	-0.0048876	0
FC35_3540	2019-04-22 15:41:07	0.744931	4.06e-05	-1.49522	0.00485	0.869173	0.00252	1.02713	0.00309	-8.17899e-08	5.32e-08	1.90278e-08	1.49e-09	0.000591462	1.52e-05	0.0187233	0.000545	5.55202	0.164	0.00859734	6.05e-05	0.282218	4.22e-05	1.46674	6.57e-05	1.88676	0.000135	1.92534	0.0177	0.00870026	0.000316	0.00850446	0.000282	0.00010527	8.12e-06	-6.79797e-05	3.07e-05	-0.000920789	0	-0.00314087	0	-0.00423606	1.6e-11	-0.0059852	0	-0.00303377	1.59e-11	-0.00487043	0
FC4_3320	2019-04-22 14:31:25	0.745224	3.52e-05	-1.53022	0.0042	0.868276	0.00129	1.02908	0.00153	7.32658e-08	4.4e-08	1.56478e-08	1.17e-09	0.000609692	1.18e-06	0.0200675	9.14e-05	5.93384	0.0452	0.00855016	4.7e-05	0.282189	3.11e-05	1.46659	5.92e-05	1.88647	0.000113	2.39578	0.0105	0.0108888	9.44e-05	0.0102801	6.24e-05	0.000106511	8.07e-06	5.27515e-05	3.19e-05	-0.000978953	0	-0.00320108	0	-0.00430414	2.09e-11	-0.0060554	0	-0.00308994	2.16e-11	-0.00491255	0
FC6_3334	2019-04-22 14:39:14	0.745024	3.64e-05	-1.50704	0.00431	0.86835	0.00182	1.02821	0.00214	1.02925e-07	4.24e-08	9.60047e-09	1.03e-09	0.000474125	6.55e-07	0.0141364	3.66e-05	4.1191	0.0254	0.00869283	4.28e-05	0.282172	3.17e-05	1.46661	5.49e-05	1.88709	0.000114	2.55108	0.00863	0.00816358	4.65e-05	0.00852475	3.68e-05	7.0362e-05	7.54e-06	9.31457e-05	3.26e-05	-0.000983455	4.04e-12	-0.00318896	0	-0.00430151	0	-0.00605784	3.63e-11	-0.0030939	2.18e-11	-0.00493151	2.08e-11
FC7_3343	2019-04-22 14:43:48	0.745137	4.65e-05	-1.51985	0.00555	0.871584	0.00232	1.02547	0.00272	6.98924e-08	7.43e-08	1.70574e-08	2.18e-09	0.00070625	1.53e-06	0.0229281	0.000128	6.62223	0.0972	0.00884907	0.000104	0.282273	6.52e-05	1.46684	8.29e-05	1.88688	0.000143	1.43021	0.00853	0.00743706	8.17e-05	0.00710753	5.59e-05	7.28965e-05	9.08e-06	3.33147e-05	3.15e-05	-0.00096197	0	-0.00315952	0	-0.00428103	1.03e-11	-0.0060264	2.99e-11	-0.00307075	0	-0.00491171	0
FC8_3350	2019-04-22 14:45:01	0.745073	3.81e-05	-1.51215	0.00454	0.867034	0.00112	1.03019	0.00133	9.17271e-08	4.5e-08	1.80743e-08	1.27e-09	0.000811982	2.26e-06	0.027394	0.00014	8.03675	0.0667	0.00863473	5.89e-05	0.282158	3.77e-05	1.4667	5.78e-05	1.88686	0.000116	2.39488	0.0105	0.014879	0.000138	0.0137183	9.66e-05	0.000118175	8.77e-06	7.55168e-05	3.23e-05	-0.000968786	4.3e-12	-0.00319611	1.82e-11	-0.00431329	2.58e-11	-0.00604663	2.33e-11	-0.00308435	1.53e-11	-0.00494851	2.97e-11
FC9_3357	2019-04-22 14:47:32	0.745	3.9e-05	-1.50346	0.00465	0.871494	0.00249	1.02609	0.00287	7.24797e-09	4.65e-08	1.49012e-08	1.37e-09	0.000420431	1.28e-06	0.0130787	4.65e-05	3.83149	0.0357	0.00866772	6.22e-05	0.282205	3.98e-05	1.4667	7.47e-05	1.8869	0.000124	2.13276	0.00865	0.00625355	2.11e-05	0.00630528	1.61e-05	9.3817e-05	8.56e-06	1.97998e-06	3.02e-05	-0.000984327	0	-0.0031837	0	-0.0043169	3.29e-11	-0.00603659	3.29e-11	-0.00311323	1.76e-11	-0.00494191	0
ples_3307	2019-05-13 12:13:52	0.745226	2.96e-05	-1.53049	0.00353	0.875503	0.00417	1.02168	0.00499	7.21772e-08	3.64e-08	1.26109e-07	9.61e-10	0.000125815	5.18e-07	0.00499691	2.08e-05	1.45514	0.0118	0.00870253	4.24e-05	0.282473	3.08e-05	1.46667	5.44e-05	1.8865	9.47e-05	2.73315	0.0182	0.00308257	3.08e-05	0.00241318	2.12e-05	0.000999104	1.04e-05	7.70675e-05	2.9e-05	-0.000974824	4.97e-12	-0.00317933	2.02e-11	-0.00427013	0	-0.00604204	0	-0.00305103	1.66e-11	-0.00489284	1.28e-11
ples1_3306	2019-05-13 12:10:20	0.745182	2.77e-05	-1.52518	0.00331	0.865409	0.00577	1.03573	0.00714	4.3778e-08	3.73e-08	8.04089e-08	1.07e-09	0.000104026	5.43e-07	0.00394902	2.01e-05	1.15289	0.0106	0.0086631	4.15e-05	0.282465	2.83e-05	1.46663	5.47e-05	1.88653	9.19e-05	2.80546	0.0158	0.00251088	2.45e-05	0.00206156	1.94e-05	0.000656328	9.76e-06	3.35357e-05	3.13e-05	-0.000945868	0	-0.00315339	2.18e-11	-0.00428438	0	-0.00603547	4.46e-11	-0.00306942	0	-0.00489886	0
ples10_3349	2019-05-13 13:01:09	0.74505	2.97e-05	-1.50947	0.00355	0.876648	0.00803	1.02466	0.00967	-6.61532e-09	4.3e-08	6.68407e-08	1.12e-09	8.02997e-05	4.85e-07	0.00322972	2.04e-05	0.943136	0.0114	0.00867416	5.08e-05	0.282431	3.08e-05	1.46663	5.52e-05	1.88672	9.86e-05	2.48133	0.0147	0.00181233	1.74e-05	0.00139238	1.07e-05	0.00048421	9.2e-06	4.85646e-06	3.18e-05	-0.000997177	5.62e-12	-0.00319185	0	-0.00429456	2.31e-11	-0.00602846	0	-0.00309437	0	-0.0049228	3.57e-11
ples11_3356	2019-05-13 13:03:12	0.745059	3.04e-05	-1.51054	0.00363	0.845716	0.00768	1.05989	0.00976	-2.068e-08	3.56e-08	6.45875e-08	1.07e-09	7.38306e-05	4.88e-07	0.00292175	1.67e-05	0.864747	0.00938	0.00854676	4.54e-05	0.282441	2.84e-05	1.46675	5.25e-05	1.88683	0.000106	2.66027	0.0134	0.00174794	1.44e-05	0.00138345	1.18e-05	0.000498312	8.85e-06	-1.21297e-05	2.9e-05	-0.000982663	7.77e-12	-0.00321541	1.73e-11	-0.00433127	0	-0.0060452	2.96e-11	-0.00311992	0	-0.00493468	2.99e-11
ples12_3363	2019-05-13 13:06:15	0.74512	3.56e-05	-1.51783	0.00424	0.873497	0.00723	1.02505	0.00886	3.00803e-08	4.29e-08	6.51806e-08	1.08e-09	9.07175e-05	1.17e-06	0.00355561	4.34e-05	1.0495	0.0156	0.00857499	4.78e-05	0.282463	2.82e-05	1.4665	4.99e-05	1.88669	0.000113	2.49091	0.0139	0.00203008	3.4e-05	0.0016197	2.82e-05	0.000468453	8.35e-06	3.54246e-06	3.21e-05	-0.000993754	3.05e-12	-0.00319135	2.18e-11	-0.00430545	0	-0.00603343	0	-0.00309472	0	-0.00494159	2.66e-11
ples13overwrite_3371	2019-05-13 13:09:01	0.745199	3.62e-05	-1.52724	0.00432	0.868197	0.00875	1.02674	0.00953	1.27326e-07	4.19e-08	7.78714e-08	1.19e-09	9.76177e-05	1.23e-06	0.00401275	4.18e-05	1.17939	0.0208	0.00868905	6.49e-05	0.282528	3.96e-05	1.46659	6.03e-05	1.88647	0.000117	2.34872	0.0139	0.00209982	1.73e-05	0.00160917	1.41e-05	0.000534677	8.91e-06	9.9905e-05	2.96e-05	-0.00096311	0	-0.0031793	1.24e-11	-0.00430122	0	-0.00604576	4.3e-11	-0.00308084	0	-0.00491317	0
ples14_3378	2019-05-13 13:10:58	0.745095	3.59e-05	-1.5148	0.00428	0.887522	0.00727	1.00871	0.00852	8.58027e-08	4.96e-08	8.70027e-08	1.23e-09	0.000103859	6.52e-07	0.00396525	2.5e-05	1.12558	0.0133	0.00885267	6.03e-05	0.282567	3.74e-05	1.46668	5.93e-05	1.88685	0.000123	2.33004	0.0152	0.0020717	2.24e-05	0.00169618	1.46e-05	0.000577863	9.39e-06	6.4199e-05	3.45e-05	-0.000957278	0	-0.00320553	0	-0.00427095	1.79e-11	-0.00602331	0	-0.00307394	1.56e-11	-0.00492	1.47e-11
ples15_3385	2019-05-13 13:13:15	0.745129	2.98e-05	-1.51891	0.00355	0.858299	0.00787	1.04361	0.00973	-1.03342e-07	4.76e-08	7.51829e-08	1.23e-09	7.83447e-05	5.4e-07	0.00320954	1.67e-05	0.938842	0.00918	0.0086092	4.25e-05	0.282503	3.23e-05	1.4665	5.8e-05	1.88658	0.000103	2.42537	0.0099	0.00175895	1.3e-05	0.00134027	1.13e-05	0.000534152	9.12e-06	-7.24556e-05	3.47e-05	-0.000972964	0	-0.00316533	0	-0.00429447	1.69e-11	-0.00602347	2.47e-11	-0.00305002	0	-0.00493754	0
ples16_3392	2019-05-13 13:16:29	0.745152	3.73e-05	-1.52162	0.00445	0.861484	0.00626	1.04044	0.00772	1.47282e-07	4.63e-08	9.28856e-08	1.2e-09	0.000114483	9.63e-07	0.00450613	2.61e-05	1.32898	0.0154	0.00864401	5.45e-05	0.282527	3.35e-05	1.46663	5.87e-05	1.88645	0.000119	2.28106	0.0147	0.00232249	1.41e-05	0.00181518	1.09e-05	0.000619376	8.94e-06	0.000114563	3.2e-05	-0.000949576	0	-0.00316638	1.56e-11	-0.00427661	0	-0.00602837	1.52e-11	-0.0030643	0	-0.00492899	1.75e-12
ples17_339	2019-05-13 13:18:30	0.745163	3.65e-05	-1.52298	0.00436	0.868648	0.00786	1.03226	0.00971	2.06238e-07	4.29e-08	8.29021e-08	1.19e-09	8.60416e-05	5.34e-07	0.00348829	2.14e-05	1.02273	0.0121	0.00861845	5.68e-05	0.282481	4.01e-05	1.4667	6.2e-05	1.88659	0.000113	2.32572	0.0108	0.0018335	1.38e-05	0.00139938	9.35e-06	0.000558285	8.45e-06	0.000144262	2.98e-05	-0.000969531	2.44e-12	-0.00319132	4.17e-12	-0.00428728	2.38e-11	-0.00602704	3.08e-11	-0.00306721	1.53e-11	-0.0049128	5.46e-12
ples18_3406	2019-05-13 13:20:27	0.745084	3.64e-05	-1.51351	0.00434	0.868634	0.00537	1.03197	0.00643	-7.38404e-08	4.31e-08	9.51598e-08	1.26e-09	0.000112639	5.64e-07	0.00479332	2.12e-05	1.41766	0.0149	0.00859906	5.2e-05	0.282415	3.32e-05	1.46664	5.8e-05	1.88681	0.000114	2.3021	0.0122	0.00250863	2.04e-05	0.00182924	1.26e-05	0.000641055	8.99e-06	-5.17743e-05	2.96e-05	-0.000961816	6.89e-12	-0.00318662	0	-0.00428761	0	-0.00602301	2.3e-11	-0.00303553	2.23e-11	-0.00487699	0
ples19_3413	2019-05-13 13:22:47	0.745155	3.31e-05	-1.52198	0.00394	0.880645	0.0115	1.03556	0.0136	-2.41652e-08	4.47e-08	6.22935e-08	1.24e-09	5.80827e-05	5.86e-07	0.00243162	1.86e-05	0.716687	0.00932	0.00862507	4.78e-05	0.282488	3.29e-05	1.4666	5.79e-05	1.88651	0.000111	2.33621	0.00881	0.00128471	1.17e-05	0.000950328	1.03e-05	0.000425344	8.48e-06	-2.28659e-05	3.09e-05	-0.000944185	0	-0.00316454	2.26e-11	-0.0042714	0	-0.0060283	1.64e-11	-0.00303405	1.78e-11	-0.0049164	2.31e-11
ples20_3420	2019-05-13 13:24:54	0.745004	3.8e-05	-1.50391	0.00454	0.862364	0.00781	1.04728	0.00969	-5.70541e-08	4.67e-08	8.08946e-08	1.24e-09	8.98419e-05	5.31e-07	0.00373799	2.21e-05	1.11892	0.0133	0.00851839	5.58e-05	0.28237	3.84e-05	1.4668	5.49e-05	1.88691	0.000119	2.39759	0.013	0.00202869	1.67e-05	0.00152356	1.15e-05	0.000566872	9.23e-06	-6.86831e-05	3.24e-05	-0.000941494	0	-0.00314883	0	-0.00427105	2.8e-11	-0.00600449	0	-0.00303004	1.56e-11	-0.00488844	1.65e-11
ples21_3427	2019-05-13 13:26:43	0.745074	3.38e-05	-1.51231	0.00402	0.86648	0.0119	1.02491	0.0142	9.11688e-08	4.46e-08	4.64014e-08	1.14e-09	6.42222e-05	1.6e-06	0.0023141	5.14e-05	0.697791	0.0171	0.00859878	4.66e-05	0.282449	3.04e-05	1.46671	5.22e-05	1.88646	0.000102	2.48826	0.015	0.00133527	3.64e-05	0.00115033	3.4e-05	0.000338726	8.46e-06	8.429e-05	3.34e-05	-0.00095841	6.97e-12	-0.0031773	0	-0.00426444	0	-0.00600436	0	-0.00307888	0	-0.00489706	0
ples22_3434	2019-05-13 13:28:36	0.744996	3.16e-05	-1.50305	0.00376	0.86731	0.0115	1.02662	0.0142	1.10127e-07	4.5e-08	4.45131e-08	1.13e-09	5.32373e-05	1.5e-06	0.00211093	4.54e-05	0.635162	0.0157	0.00867963	4.43e-05	0.282476	3.02e-05	1.4667	5.24e-05	1.88691	0.000102	2.46353	0.0137	0.00117661	2.72e-05	0.00091714	2.63e-05	0.000320253	8.27e-06	8.28054e-05	3.37e-05	-0.000935585	0	-0.00315573	0	-0.00426213	0	-0.00602062	0	-0.00304375	0	-0.00489653	0
ples23_3441	2019-05-13 13:30:07	0.745004	3.49e-05	-1.50392	0.00416	0.864539	0.00872	1.03973	0.0104	9.57757e-08	4.48e-08	7.7747e-08	1.21e-09	6.7459e-05	4.86e-07	0.00277587	1.81e-05	0.808882	0.0092	0.00868237	4.52e-05	0.28245	3.5e-05	1.46647	5.39e-05	1.8866	0.000109	2.38988	0.00885	0.0014921	1.25e-05	0.00113742	9.52e-06	0.000544321	8.49e-06	8.27297e-05	3.25e-05	-0.000942582	0	-0.00317725	2.1e-11	-0.00427542	0	-0.00603703	2.94e-11	-0.00305608	0	-0.00491323	0
ples24_3448	2019-05-13 13:32:28	0.745042	3.28e-05	-1.50909	0.00393	0.873052	0.00958	1.03522	0.0116	-9.45277e-08	4.39e-08	7.55358e-08	1.18e-09	6.43418e-05	5.24e-07	0.00278917	1.9e-05	0.819294	0.00981	0.00857734	4.86e-05	0.282465	3.2e-05	1.4667	5.79e-05	1.88655	0.000106	2.35094	0.00945	0.00148478	1.24e-05	0.00105963	9.35e-06	0.00051391	8.52e-06	-8.46634e-05	3.12e-05	-0.000954272	5.55e-12	-0.00314751	2.14e-11	-0.00427944	2.08e-11	-0.0060175	0	-0.0030416	7.72e-12	-0.00489633	1.22e-11
ples25b_3458	2019-05-13 13:35:03	0.744915	3.49e-05	-1.49336	0.00416	0.873498	0.0104	1.03849	0.0131	-5.39799e-08	3.91e-08	5.61141e-08	1.22e-09	5.72134e-05	4.84e-07	0.00241395	1.86e-05	0.699505	0.00925	0.00873119	5.05e-05	0.282449	3.25e-05	1.46659	5.46e-05	1.88711	0.000112	2.36385	0.00546	0.00128233	1.11e-05	0.000946245	8.37e-06	0.000386075	8.41e-06	-3.95901e-05	2.83e-05	-0.000928076	3.88e-12	-0.00315523	1.33e-11	-0.00424973	0	-0.0060171	0	-0.00301919	0	-0.00486414	0
ples26_3465	2019-05-13 13:36:46	0.744859	3.51e-05	-1.4867	0.00419	0.868244	0.00965	1.03622	0.012	4.77055e-08	4.4e-08	8.22889e-08	1.18e-09	7.05882e-05	6.52e-07	0.00299685	2.76e-05	0.867398	0.0115	0.00865462	5.11e-05	0.282436	3.33e-05	1.46667	5.94e-05	1.88709	0.000111	2.32648	0.00938	0.00158063	1.91e-05	0.00115581	1.33e-05	0.00055411	8.33e-06	3.47223e-05	3.12e-05	-0.000935508	1.92e-12	-0.00315352	2.27e-11	-0.00424534	3.01e-11	-0.00600197	2.94e-11	-0.00300771	2.09e-11	-0.00488375	1.35e-11
ples27_3472	2019-05-13 13:41:20	0.744999	3.28e-05	-1.50342	0.00391	0.875703	0.00581	1.02033	0.0069	3.22533e-08	4.53e-08	9.45189e-08	1.14e-09	9.84856e-05	5.18e-07	0.00409933	2.1e-05	1.21361	0.0125	0.00857891	4.83e-05	0.282447	3.19e-05	1.46661	5.87e-05	1.88689	0.000109	2.36684	0.0111	0.00218599	1.82e-05	0.00163343	1.17e-05	0.000649242	8.42e-06	1.97432e-05	3.19e-05	-0.000952563	0	-0.00312691	1.05e-11	-0.00427064	5.73e-12	-0.00600963	4.52e-11	-0.0030561	0	-0.00488894	3.46e-11
ples28_3479	2019-05-13 13:43:04	0.745	4.45e-05	-1.50349	0.00531	0.910599	0.014	1.00529	0.0162	8.09524e-08	6.24e-08	4.88906e-08	1.69e-09	7.65578e-05	1.59e-06	0.00278992	4.83e-05	0.824731	0.0183	0.00879315	6.61e-05	0.2825	4.56e-05	1.46663	7.21e-05	1.88635	0.000145	1.62533	0.0102	0.00104281	1.78e-05	0.000870508	1.76e-05	0.000236722	8.5e-06	4.58216e-05	3.07e-05	-0.000952202	3.64e-12	-0.00316252	0	-0.00425849	0	-0.00601776	4.13e-11	-0.00303636	1.96e-11	-0.00489591	0
ples29_3488	2019-05-13 13:45:16	0.744888	3.7e-05	-1.49019	0.00441	0.855468	0.00713	1.05231	0.00915	2.83307e-07	4.75e-08	7.29199e-08	1.25e-09	8.31694e-05	1.53e-06	0.00346261	5.38e-05	1.03343	0.0186	0.00857478	4.89e-05	0.282413	3.31e-05	1.46677	6.62e-05	1.88691	0.000128	2.38822	0.0103	0.00187746	3.37e-05	0.00141091	2.9e-05	0.00050208	9.29e-06	0.000189212	3.38e-05	-0.000909252	0	-0.00314618	0	-0.00425086	1.22e-11	-0.00600397	3.05e-11	-0.00302504	0	-0.00487259	2.38e-11
ples3_3308	2019-05-13 12:16:52	0.745057	3.04e-05	-1.51025	0.00362	0.887709	0.00538	1.01193	0.00613	-1.26394e-07	3.65e-08	8.70788e-08	9.59e-10	0.000107637	4.77e-07	0.00423318	1.58e-05	1.23207	0.0106	0.00867599	4.37e-05	0.282454	2.81e-05	1.46662	5e-05	1.88691	9.41e-05	2.79272	0.0157	0.00267713	1.91e-05	0.00211932	1.32e-05	0.000713158	8.7e-06	-8.42725e-05	3.11e-05	-0.000951508	6.52e-12	-0.00314828	0	-0.0042596	3.26e-12	-0.00600892	0	-0.00302825	0	-0.00487827	5.57e-12
ples30_3495	2019-05-13 13:48:07	0.745224	5.43e-05	-1.53015	0.00647	0.882679	0.0205	1.0946	0.0275	1.16274e-07	8.41e-08	6.98256e-08	2.46e-09	7.26275e-05	9.93e-07	0.00265797	3.31e-05	0.776236	0.0176	0.00864375	9.18e-05	0.282572	6.7e-05	1.46669	9.32e-05	1.88586	0.000168	1.21483	0.0101	0.000725315	1.08e-05	0.000619241	9.67e-06	0.000245947	8.61e-06	5.17559e-05	3.12e-05	-0.000916616	5.03e-12	-0.00314457	0	-0.0042462	3.1e-11	-0.00598914	3.71e-11	-0.00304344	0	-0.00487691	2.08e-11
ples31_3501	2019-05-13 13:50:06	0.744952	3.64e-05	-1.49773	0.00434	0.871439	0.00921	1.0268	0.011	1.16017e-07	4.39e-08	7.60866e-08	1.2e-09	7.90747e-05	1.04e-06	0.00314641	3.86e-05	0.921638	0.0142	0.00870406	4.82e-05	0.282477	3.16e-05	1.46661	6.34e-05	1.88663	0.000119	2.3579	0.0111	0.00169655	2.63e-05	0.00133429	2.15e-05	0.000513841	8.7e-06	8.6452e-05	3.14e-05	-0.00091213	0	-0.00313338	5.1e-12	-0.00425045	5.75e-12	-0.00600918	4.46e-11	-0.00302382	0	-0.00486055	0
ples32_3508	2019-05-13 13:52:08	0.744931	3.26e-05	-1.49528	0.00389	0.875444	0.0062	1.02124	0.00701	-7.99892e-08	4.61e-08	9.31051e-08	1.26e-09	0.000105593	6.5e-07	0.00433424	1.81e-05	1.25418	0.0112	0.00874705	4.42e-05	0.282445	3.22e-05	1.4666	6.18e-05	1.88668	0.000107	2.29569	0.00997	0.00223378	1.34e-05	0.00171013	9.83e-06	0.000622454	9.17e-06	-5.61647e-05	3.12e-05	-0.000931919	0	-0.00314758	1.49e-12	-0.00423691	1.8e-11	-0.00600157	4.24e-11	-0.00303608	1.96e-11	-0.004862	1.77e-11
ples33_3515	2019-05-13 13:54:10	0.744961	3.45e-05	-1.49937	0.00413	0.862394	0.00688	1.04244	0.00883	2.25492e-07	4.23e-08	7.14673e-08	1.2e-09	9.2244e-05	7.53e-07	0.00349158	2.45e-05	1.01141	0.0104	0.00877713	4.96e-05	0.282482	3.66e-05	1.46671	5.56e-05	1.88666	0.000106	2.45244	0.0112	0.00193483	1.77e-05	0.00158539	1.45e-05	0.000508025	8.85e-06	0.000164689	3.12e-05	-0.000893708	5.43e-12	-0.00312118	1.21e-11	-0.00422363	2.9e-11	-0.0060132	3.57e-11	-0.00301735	0	-0.00487301	0
ples34_3522	2019-05-13 13:56:47	0.744992	3.27e-05	-1.50253	0.0039	0.894481	0.0112	1.01186	0.013	8.52236e-08	4.07e-08	4.49463e-08	1.1e-09	5.56024e-05	8.87e-07	0.00221069	3.4e-05	0.646648	0.0114	0.00861055	4.51e-05	0.282475	3.11e-05	1.46676	5.27e-05	1.88667	0.000103	2.56797	0.0107	0.00128446	2.35e-05	0.00100512	1.83e-05	0.000337038	8.41e-06	7.02693e-05	3.2e-05	-0.000951661	0	-0.00312829	0	-0.00425036	0	-0.00600674	3.62e-11	-0.0030202	6.43e-12	-0.00486407	0
ples36_3534	2019-05-13 14:04:49	0.74493	3.02e-05	-1.49517	0.00361	0.867814	0.0103	1.03939	0.0123	-1.83086e-08	3.3e-08	1.98234e-08	8.87e-10	5.16925e-05	3.91e-07	0.00188955	1.28e-05	0.551244	0.00582	0.00865334	3.52e-05	0.28247	2.6e-05	1.46676	4.68e-05	1.88692	9.25e-05	3.40124	0.0241	0.00145511	1.26e-05	0.0012372	1.21e-05	0.000194885	8.25e-06	-7.12958e-06	3.4e-05	-0.000938983	0	-0.00314288	0	-0.00426146	2.98e-11	-0.00600888	3.35e-11	-0.00304032	0	-0.00488688	0
ples37_3535	2019-05-13 14:08:01	0.745001	3.27e-05	-1.50365	0.00389	0.881666	0.00791	1.024	0.00909	-1.17943e-07	4.33e-08	7.42296e-08	1.22e-09	7.89616e-05	5e-07	0.00324584	1.62e-05	0.95103	0.00959	0.00863043	4.52e-05	0.28248	2.9e-05	1.4668	5.4e-05	1.88667	0.000105	2.58787	0.013	0.00189402	1.31e-05	0.00144032	1.06e-05	0.000564155	1e-05	-0.000100775	3.4e-05	-0.00092439	2.59e-12	-0.00312662	0	-0.00424836	0	-0.00598968	3.42e-11	-0.00302102	1.57e-11	-0.00486704	0
ples38_3536	2019-05-13 14:10:11	0.744996	3.44e-05	-1.50305	0.00411	0.87084	0.0122	1.03115	0.0143	-1.20338e-08	4.2e-08	4.99287e-08	1.13e-09	5.63404e-05	5.46e-07	0.00225837	2.06e-05	0.660263	0.0086	0.00865877	4.41e-05	0.282438	3.01e-05	1.46675	5.56e-05	1.88665	9.78e-05	2.56366	0.0151	0.00130819	1.82e-05	0.00100856	1.35e-05	0.000371455	9e-06	-6.44814e-06	3.24e-05	-0.000899079	2.47e-12	-0.00313477	2.27e-11	-0.00421658	1.92e-11	-0.00599687	0	-0.00302374	0	-0.00485766	2.21e-11
ples39_3537	2019-05-13 14:12:24	0.744841	3.12e-05	-1.48457	0.00373	0.889619	0.008	1.00826	0.00928	4.58918e-08	4.31e-08	6.8347e-08	1.07e-09	7.53167e-05	4.65e-07	0.00298811	1.98e-05	0.860034	0.00912	0.00873557	4.03e-05	0.282452	2.86e-05	1.46662	4.93e-05	1.88691	9.67e-05	2.58684	0.0121	0.00174237	1.72e-05	0.00136744	1.18e-05	0.000512614	8.31e-06	3.86914e-05	3.36e-05	-0.000930572	0	-0.00313466	0	-0.00422388	0	-0.00599963	0	-0.00303852	0	-0.00487562	0
ples4_3309	2019-05-13 12:19:20	0.74519	3.13e-05	-1.52612	0.00373	0.859119	0.00509	1.04035	0.00616	7.65155e-08	3.91e-08	7.56863e-08	1.01e-09	0.000109257	4.24e-07	0.00431069	1.7e-05	1.26171	0.0113	0.00861042	4.29e-05	0.282518	3.07e-05	1.46668	5.23e-05	1.88668	0.000106	2.75222	0.017	0.00266333	1.99e-05	0.00210281	1.5e-05	0.000611153	8.69e-06	6.93524e-05	3.29e-05	-0.000951898	5.75e-12	-0.00317591	1.89e-11	-0.00428295	2.65e-11	-0.00604878	6.47e-12	-0.00303118	1.85e-11	-0.00492813	0
ples40_3538	2019-05-13 14:14:29	0.744992	3.1e-05	-1.5026	0.00369	0.866683	0.00878	1.03519	0.0103	8.39847e-08	3.96e-08	6.19451e-08	1.02e-09	6.21082e-05	4.68e-07	0.00246417	1.45e-05	0.722433	0.00729	0.00858601	3.79e-05	0.282471	3.01e-05	1.46663	5.5e-05	1.88658	9.7e-05	2.70078	0.0137	0.00149988	1.07e-05	0.00118277	9.59e-06	0.000483809	7.89e-06	6.68277e-05	3.16e-05	-0.00093267	4.92e-12	-0.00314009	2.24e-11	-0.00424897	0	-0.00598867	0	-0.00303462	1.28e-11	-0.00487934	1.7e-11
ples5_3311	2019-05-13 12:21:45	0.745222	2.91e-05	-1.52994	0.00347	0.867314	0.00695	1.02662	0.00846	-5.98058e-08	3.55e-08	6.51214e-08	1.1e-09	8.65478e-05	4.78e-07	0.00341877	1.45e-05	0.998194	0.00911	0.00861235	4.17e-05	0.282388	2.79e-05	1.46664	5.4e-05	1.88648	9.99e-05	2.8427	0.0163	0.00217994	1.64e-05	0.00173063	1.32e-05	0.000547736	9.42e-06	-5.63925e-05	3.05e-05	-0.000963646	2.74e-12	-0.0031961	1.33e-11	-0.00428704	1.91e-11	-0.00603557	0	-0.00306119	0	-0.00487945	0
ples6_3319	2019-05-13 12:27:13	0.74515	3.19e-05	-1.52133	0.0038	0.868135	0.00533	1.03248	0.00644	7.36921e-08	4.01e-08	1.00359e-07	1.08e-09	0.000112231	5.66e-07	0.00452639	1.69e-05	1.32347	0.0108	0.00856411	4.25e-05	0.282426	2.76e-05	1.46664	5.3e-05	1.88648	0.0001	2.63237	0.0183	0.00267279	1.77e-05	0.00207494	1.24e-05	0.000769099	9.07e-06	6.16531e-05	3.23e-05	-0.00098011	0	-0.00316864	7.17e-12	-0.00429378	0	-0.0060529	0	-0.00307415	1.88e-11	-0.0048957	2.18e-11
ples7maybe_3327	2019-05-13 12:44:12	0.745162	3.24e-05	-1.52275	0.00386	0.869937	0.000942	1.02704	0.00111	-6.95716e-08	4.17e-08	2.28991e-08	1.24e-09	0.00094037	3.5e-06	0.0310967	0.000193	9.12997	0.0773	0.00856812	5.23e-05	0.282114	3.53e-05	1.46653	6.16e-05	1.88655	9.87e-05	2.30017	0.0107	0.0162517	0.000173	0.0152637	0.000126	0.000151955	8.22e-06	-4.91417e-05	2.87e-05	-0.00100941	4.17e-12	-0.00320168	1.19e-11	-0.00431737	0	-0.00606335	1.68e-11	-0.00308951	1.1e-11	-0.00491558	2.34e-11
ples8maybe_3333	2019-05-13 12:48:10	0.745066	2.87e-05	-1.51133	0.00342	0.870975	0.0078	1.02709	0.00911	5.93054e-09	4.09e-08	5.54841e-08	1.16e-09	7.23781e-05	4.54e-07	0.00283816	1.62e-05	0.834999	0.00876	0.00863096	4.45e-05	0.282429	2.85e-05	1.46663	4.75e-05	1.88667	9.57e-05	2.6965	0.0151	0.00172442	1.44e-05	0.00137226	1.09e-05	0.000432977	9.4e-06	1.45518e-06	3.32e-05	-0.000988004	4.28e-12	-0.00316823	0	-0.00430773	0	-0.0060555	8.56e-12	-0.00308622	1.8e-11	-0.00492921	0
ples9_or_4SMST778_020_3341	2019-05-24 14:32:19	0.745052	4.22e-05	-1.50967	0.00503	0.868697	0.0131	1.05265	0.0164	5.93437e-08	5.81e-08	6.23356e-08	1.67e-09	8.80914e-05	7.44e-07	0.00328285	3.46e-05	0.944766	0.0175	0.00875533	9.19e-05	0.282353	5.36e-05	1.46659	7.99e-05	1.88667	0.000149	1.63025	0.0118	0.00121993	1.63e-05	0.00101718	1.03e-05	0.000303842	8.46e-06	2.02929e-05	2.94e-05	-0.000979104	3.88e-12	-0.00320124	2.06e-11	-0.00430646	0	-0.00604664	1.99e-11	-0.00309029	1.47e-11	-0.00491358	1.2e-11
ples9B_3342	2019-05-13 12:56:46	0.745073	4.2e-05	-1.51217	0.00501	0.883855	0.00931	1.01987	0.011	-3.68381e-08	6.5e-08	1.10969e-07	1.78e-09	0.000118009	7.97e-07	0.00445672	3.12e-05	1.31111	0.0221	0.00874984	8.44e-05	0.282505	4.93e-05	1.46633	7.93e-05	1.88662	0.000136	1.61443	0.0112	0.00162188	1.78e-05	0.00132704	1.19e-05	0.000520047	9.56e-06	-2.77637e-05	3.12e-05	-0.000984853	0	-0.00319272	0	-0.00428953	0	-0.00605086	0	-0.00309983	0	-0.0049288	9.57e-12
[truncated: 12 more columns]

## Sheet: session2
name	timestamp	179Hf/177Hf - Measured' mean	179Hf/177Hf - Measured' SE	Beta 179Hf/177Hf' mean	Beta 179Hf/177Hf' SE	171Yb/173Yb - Measured' mean	171Yb/173Yb - Measured' SE	Beta 171Yb/173Yb' mean	Beta 171Yb/173Yb' SE	180W/180Hf' mean	180W/180Hf' SE	180Ta/180Hf' mean	180Ta/180Hf' SE	176Lu/177Hf' mean	176Lu/177Hf' SE	176Yb/177Hf' mean	176Yb/177Hf' SE	174Yb/174Hf' mean	174Yb/174Hf' SE	174Hf/177Hf Corrected' mean	174Hf/177Hf Corrected' SE	176Hf/177Hf Corrected' mean	176Hf/177Hf Corrected' SE	178Hf/177Hf Corrected' mean	178Hf/177Hf Corrected' SE	180Hf/177Hf Corrected' mean	180Hf/177Hf Corrected' SE	Total Hf ion beam (V)' mean	Total Hf ion beam (V)' SE	Yb173 ion beam (V)' mean	Yb173 ion beam (V)' SE	Total Lu ion beam (V)' mean	Total Lu ion beam (V)' SE	Total Ta ion beam (V)' mean	Total Ta ion beam (V)' SE	Total W ion beam (V)' mean	Total W ion beam (V)' SE	Baseline 171Yb' mean	Baseline 171Yb' SE	Baseline 172Yb' mean	Baseline 172Yb' SE	Baseline 173Yb' mean	Baseline 173Yb' SE	Baseline 174Yb' mean	Baseline 174Yb' SE	Baseline 175Lu' mean	Baseline 175Lu' SE	Baseline 176Hf' mean	Baseline 176Hf' SE
1HBPS10-104_3621	2019-06-03 15:14:57	0.744429	3.06e-05	-1.43532	0.00365	0.874337	0.00172	1.02147	0.00207	9.10126e-08	3.71e-08	1.39994e-08	9.94e-10	0.000473311	1.28e-05	0.0132562	0.000487	3.9375	0.148	0.00866297	4.03e-05	0.282407	2.53e-05	1.46655	4.96e-05	1.88703	8.96e-05	2.5314	0.0135	0.00746019	0.00025	0.0082576	0.000199	0.000101405	7.23e-06	5.59061e-05	2.71e-05	-0.00100325	0	-0.00320101	9.99e-12	-0.00430145	2.64e-11	-0.00605947	3.59e-11	-0.00308011	1.74e-11	-0.00492794	3.23e-11
1HBPS10-111_3622	2019-06-03 15:15:58	0.744473	2.93e-05	-1.44066	0.0035	0.871714	0.00113	1.02475	0.00131	4.65175e-08	3.28e-08	8.51962e-09	8.31e-10	0.000531867	2.83e-06	0.0156043	0.000125	4.55824	0.04	0.00862066	3.11e-05	0.282534	2.43e-05	1.46648	5.25e-05	1.88675	8.68e-05	2.96432	0.0111	0.010563	0.000123	0.0111882	0.000101	7.53925e-05	7.2e-06	5.37292e-05	2.88e-05	-0.000996304	1.15e-12	-0.00319227	0	-0.00431202	2.42e-11	-0.00607108	0	-0.00308208	1.62e-11	-0.00494008	0
1HBPS10-117_3623	2019-06-03 15:16:48	0.744467	3.99e-05	-1.43987	0.00476	0.869616	0.00131	1.02768	0.00155	1.23048e-07	6.02e-08	3.68006e-08	1.31e-09	0.000727864	5.34e-06	0.0210911	0.000133	6.48916	0.0778	0.00843623	5.54e-05	0.28205	3.72e-05	1.46673	6.55e-05	1.88678	0.000127	2.04555	0.0376	0.00963158	0.000144	0.0103243	0.000136	0.00021518	7.78e-06	6.98295e-05	3.1e-05	-0.000985388	2.72e-12	-0.00321439	1.67e-11	-0.00429892	0	-0.00605961	1.9e-11	-0.00308492	1.54e-11	-0.00491761	0
1HBPS325-198_3618	2019-06-03 15:13:02	0.744343	3.44e-05	-1.42513	0.00411	0.870368	0.000709	1.02636	0.000838	5.63703e-08	4.15e-08	7.16457e-08	1.31e-09	0.00139094	2.56e-06	0.0387176	0.00011	11.3563	0.0805	0.00862623	5.01e-05	0.282618	3.31e-05	1.46671	5.63e-05	1.88704	0.000113	2.05719	0.0109	0.0181074	0.000135	0.0202637	0.000108	0.000430509	8.38e-06	2.92779e-05	2.56e-05	-0.000983736	0	-0.00315831	2.89e-12	-0.00429174	3.22e-11	-0.00605927	2.26e-11	-0.00307342	1.07e-11	-0.00492546	0
1HBPS325-199_3617	2019-06-03 15:11:34	0.744435	2.39e-05	-1.43612	0.00285	0.868862	0.000695	1.02803	0.000813	1.14556e-08	2.54e-08	3.10793e-08	6.13e-10	0.000706871	1.73e-06	0.0210987	7.81e-05	6.20566	0.0297	0.00855946	2.48e-05	0.28253	1.98e-05	1.46658	4.48e-05	1.88699	6.95e-05	3.64916	0.0103	0.0174643	0.00011	0.0182002	9.23e-05	0.000330572	6.63e-06	2.17635e-05	2.79e-05	-0.000962149	5.69e-12	-0.0031864	8.88e-12	-0.00429528	0	-0.00602458	0	-0.00307224	1.52e-11	-0.00490716	0
1HBPS351-054_3630	2019-06-03 15:22:42	0.744267	1.73e-05	-1.41608	0.00206	0.870456	0.0003	1.02608	0.000354	5.49637e-09	1.11e-08	3.88256e-08	3.09e-10	0.000626005	1.76e-06	0.0234351	4.98e-05	6.84129	0.0189	0.00860934	1.39e-05	0.282098	1.2e-05	1.46652	3.58e-05	1.88698	4.93e-05	8.0167	0.0106	0.0424599	0.000122	0.0353943	0.000128	0.000905602	7.33e-06	1.27432e-05	2.68e-05	-0.000993035	0	-0.00320755	2.69e-11	-0.00428643	0	-0.0060438	0	-0.0030803	0	-0.00491219	0
1HBPS351-090_3629	2019-06-03 15:21:08	0.744426	3.24e-05	-1.43499	0.00387	0.874601	0.00151	1.0218	0.00174	7.53308e-08	3.79e-08	3.27832e-08	1.23e-09	0.000537242	4.95e-06	0.0138658	0.000185	4.10522	0.0634	0.00873025	4.06e-05	0.282605	2.81e-05	1.46652	5.41e-05	1.8869	9.93e-05	2.37337	0.0102	0.00751902	0.000134	0.00905148	0.000121	0.000228675	8.99e-06	6.7179e-05	2.66e-05	-0.00100446	0	-0.00320395	0	-0.00429309	0	-0.00604632	0	-0.00307844	0	-0.00494841	0
1HBPS351-091_3625	2019-06-03 15:19:14	0.744381	2.06e-05	-1.42991	0.00247	0.870203	0.000287	1.02642	0.000337	-3.46037e-08	1.7e-08	2.78267e-08	4.64e-10	0.00128167	6.1e-06	0.0387853	0.000179	11.3703	0.0665	0.00853389	2.13e-05	0.282513	1.52e-05	1.46667	4.48e-05	1.88689	6.05e-05	5.26895	0.0192	0.0457266	0.000142	0.0471388	0.000144	0.000422069	7e-06	-4.15298e-05	2.68e-05	-0.000996157	0	-0.00320793	5.99e-12	-0.00430783	0	-0.0060512	2.97e-11	-0.00307168	1.46e-11	-0.00494168	0
1HBPS351-194_3626	2019-06-03 15:20:05	0.744364	3.48e-05	-1.42762	0.00415	0.868107	0.00105	1.02909	0.00125	-1.03163e-07	3.75e-08	2.72704e-08	1.07e-09	0.000948723	2.44e-06	0.0202638	5.26e-05	5.96581	0.0382	0.00859064	4.3e-05	0.282616	2.91e-05	1.46646	5.73e-05	1.88696	0.000101	2.38807	0.0117	0.0109074	7.03e-05	0.0158726	0.000101	0.000186729	7.57e-06	-6.68188e-05	2.71e-05	-0.000992182	0	-0.00319359	1.45e-11	-0.00432693	2.01e-11	-0.00608198	1.23e-11	-0.0030944	0	-0.00492596	0
1HBPS351-200_3624	2019-06-03 15:18:01	0.744347	3.25e-05	-1.42559	0.00388	0.868719	0.000857	1.0284	0.00102	4.154e-09	4.21e-08	2.40159e-08	1.09e-09	0.000865111	2.9e-06	0.026014	9.6e-05	7.74754	0.0491	0.00845436	4.16e-05	0.282387	2.78e-05	1.4666	5.79e-05	1.88694	0.000101	2.31004	0.0127	0.01362	8.7e-05	0.0138831	5.76e-05	0.000163658	7.39e-06	-1.97532e-05	2.84e-05	-0.000987916	0	-0.00319313	0	-0.00432625	0	-0.00606777	7.85e-12	-0.00308409	0	-0.00493052	0
BFB1-001_3575	2019-06-03 14:10:48	0.744895	4.1e-05	-1.49091	0.00489	0.869414	0.00247	1.02696	0.00288	6.90336e-07	5.52e-08	2.38827e-07	1.99e-09	0.000454866	2.86e-06	0.0131715	8.31e-05	3.85332	0.043	0.00874596	6.02e-05	0.282522	4.11e-05	1.46678	6.7e-05	1.88673	0.00013	1.86284	0.0281	0.00556387	8.1e-05	0.00592058	6.27e-05	0.00130874	2.61e-05	0.000372242	2.84e-05	-0.00100865	1.63e-12	-0.00323682	2.11e-11	-0.00433794	2.19e-11	-0.00609639	4.34e-11	-0.00308865	0	-0.00494883	2.12e-11
BFB1-002_3576	2019-06-03 14:12:33	0.744783	2.83e-05	-1.47762	0.00338	0.870139	0.000759	1.02645	0.000891	-4.5452e-08	3.11e-08	9.72405e-08	1.01e-09	0.000750621	8.98e-07	0.0242316	6.69e-05	7.14217	0.0389	0.00855328	3.6e-05	0.282567	2.31e-05	1.4665	4.61e-05	1.88678	8.24e-05	2.65736	0.00848	0.0145632	8.31e-05	0.0140261	5.18e-05	0.000751378	8.31e-06	-3.47283e-05	2.48e-05	-0.00103091	0	-0.00322232	0	-0.00432246	3.58e-11	-0.00604343	1.19e-11	-0.00313267	1.28e-11	-0.00494752	0
BFB1-003_3577	2019-06-03 14:13:28	0.744783	2.18e-05	-1.47756	0.0026	0.869831	0.00053	1.027	0.000625	-1.15059e-08	2.49e-08	1.09025e-07	7.28e-10	0.000740026	3.79e-07	0.0260776	6.34e-05	7.62402	0.0306	0.00861604	2.43e-05	0.282566	1.72e-05	1.46649	3.32e-05	1.88684	6.39e-05	3.84051	0.00311	0.0225182	6.55e-05	0.0199812	2.15e-05	0.00121508	8.57e-06	-1.27797e-05	2.87e-05	-0.000971121	0	-0.0032283	0	-0.00431715	2.25e-11	-0.00605591	0	-0.00311039	0	-0.00493941	4.56e-12
BFB1-003B_3578	2019-06-03 14:14:33	0.744777	2.23e-05	-1.47691	0.00266	0.869302	0.000551	1.02759	0.000649	1.05319e-07	2.87e-08	8.50106e-08	7.89e-10	0.00097398	2.08e-06	0.0307638	6.93e-05	9.06078	0.0477	0.008666	3.64e-05	0.282528	2.09e-05	1.46659	3.57e-05	1.88687	7.18e-05	2.5084	0.0118	0.0172757	9.8e-05	0.0169154	6.9e-05	0.000623136	7.05e-06	6.50066e-05	2.17e-05	-0.000859238	0	-0.00308676	0	-0.0041926	0	-0.00597182	3.49e-11	-0.00296777	0	-0.00481549	0
BFB1-003C_3579	2019-06-03 14:15:48	0.744716	1.71e-05	-1.46965	0.00204	0.869351	0.000209	1.02744	0.000248	-4.74562e-09	1.33e-08	9.84581e-08	4.43e-10	0.00103786	1.76e-06	0.0386035	2.31e-05	11.4174	0.0234	0.00853498	1.58e-05	0.282573	1.18e-05	1.46652	3.24e-05	1.88681	4.75e-05	5.07174	0.00581	0.0442806	5.2e-05	0.0369846	6.95e-05	0.00145125	6.61e-06	-5.25236e-06	2.02e-05	-0.000857047	4.59e-12	-0.003102	0	-0.00422143	0	-0.00595966	3.33e-11	-0.00297416	1.06e-11	-0.00484126	1.3e-11
BFB1-004B_3590	2019-06-03 14:26:19	0.744362	1.73e-05	-1.42742	0.00206	0.870084	6.56e-05	1.02656	7.71e-05	8.25942e-08	1.3e-08	1.04498e-07	3.46e-10	0.00285543	1.7e-06	0.124949	0.000265	37.1578	0.118	0.00842183	1.85e-05	0.28261	1.37e-05	1.46653	3.64e-05	1.88679	4.69e-05	5.54503	0.00848	0.155785	0.000273	0.111453	0.000171	0.0016813	5.97e-06	0.00013911	2.16e-05	-0.000986617	4.95e-12	-0.00318071	1.1e-11	-0.00429198	0	-0.00604	0	-0.0030748	2.17e-11	-0.00490252	2.44e-11
BFB1-019_3593	2019-06-03 14:30:23	0.744311	3.37e-05	-1.42126	0.00402	0.869781	8.76e-05	1.02691	0.000103	6.19298e-09	1.46e-08	1.43743e-07	6.14e-10	0.00261117	3.13e-06	0.110998	0.000362	32.9667	0.142	0.00844722	2.35e-05	0.282608	2.21e-05	1.46648	8.83e-05	1.88706	7.71e-05	5.2473	0.0147	0.131388	0.000403	0.0964044	0.00025	0.00220241	1.19e-05	1.35842e-05	2.05e-05	-0.000958048	0	-0.00318767	2.08e-11	-0.00428532	0	-0.00605164	3.35e-11	-0.00306167	0	-0.00492088	2.59e-11
BFB1-022_3594	2019-06-03 14:31:19	0.744343	2.2e-05	-1.42508	0.00263	0.869878	4.95e-05	1.0268	5.81e-05	8.27377e-06	3.07e-07	2.11388e-07	2.19e-09	0.00510702	2.23e-05	0.225044	0.00056	68.8304	0.3	0.00821166	2.69e-05	0.282755	1.7e-05	1.46652	5.26e-05	1.88695	5.84e-05	5.0297	0.00778	0.255799	0.000781	0.179816	0.000854	0.00308894	3.27e-05	0.0126174	0.00047	-0.000973733	4.81e-12	-0.00318998	2.34e-11	-0.00429028	6.87e-12	-0.00604768	0	-0.00305977	1.11e-12	-0.004912	1.52e-11
BFB1-024_3583	2019-06-03 14:18:13	0.744467	2.9e-05	-1.43985	0.00346	0.870238	0.000184	1.02639	0.000217	5.69867e-08	1.06e-08	1.66518e-07	8.93e-10	0.000763118	1.32e-06	0.0336891	1.73e-05	9.87966	0.0165	0.00856573	1.28e-05	0.282571	1.66e-05	1.46668	7.44e-05	1.88684	6.82e-05	6.94994	0.0188	0.0528454	0.00014	0.0372418	8.41e-05	0.00339244	1.82e-05	0.000120916	2.2e-05	-0.000963254	4.59e-12	-0.0031571	0	-0.00427171	1.24e-11	-0.00601176	3.7e-11	-0.0030639	0	-0.0048948	1.88e-11
BFB1-026_3580	2019-06-03 14:17:00	0.744511	1.65e-05	-1.44517	0.00197	0.869248	0.000157	1.02755	0.000186	5.428e-08	1.03e-08	1.56473e-07	4.53e-10	0.000848065	1.58e-06	0.0389638	2.51e-05	11.5021	0.0211	0.00854334	1.34e-05	0.282554	1.13e-05	1.46651	3.31e-05	1.88683	4.54e-05	6.87614	0.00854	0.0604865	8.14e-05	0.0411999	9.61e-05	0.0031544	9.15e-06	0.000112746	2.14e-05	-0.000855076	0	-0.00308302	1.55e-11	-0.00422446	2.22e-11	-0.00596851	1.71e-11	-0.0029877	0	-0.00480185	0
BFB1-027_3591	2019-06-03 14:28:13	0.744457	4.03e-05	-1.43872	0.00481	0.870161	6.57e-05	1.02647	7.77e-05	8.97399e-07	1.63e-08	1.82108e-07	4.96e-10	0.00499107	6.12e-06	0.221883	0.000972	68.1346	0.466	0.00825799	4.24e-05	0.282708	2.72e-05	1.46664	0.000101	1.88696	9.44e-05	4.708	0.0137	0.234342	0.00119	0.166074	0.000494	0.00249761	8.8e-06	0.00127386	2.31e-05	-0.000970632	0	-0.00319308	2.05e-11	-0.0042833	0	-0.00602622	4.8e-11	-0.00305764	1.83e-11	-0.00491186	0
BFB1-030_3592	2019-06-03 14:29:22	0.744344	3.71e-05	-1.42557	0.00441	0.870043	8.86e-05	1.02661	0.000105	6.87431e-08	1.2e-08	7.6779e-08	4.34e-10	0.0024835	2.46e-06	0.105956	0.000242	31.5657	0.124	0.00844064	2.46e-05	0.282611	2.31e-05	1.46659	9.78e-05	1.88694	8.72e-05	5.89976	0.0178	0.141006	0.000546	0.103528	0.000345	0.00132237	8.65e-06	0.000119965	2.11e-05	-0.000964878	0	-0.00317628	1.69e-11	-0.00427598	0	-0.00602868	0	-0.00306052	0	-0.00490019	0
BFB1-035_3584	2019-06-03 14:19:15	0.744357	1.47e-05	-1.42677	0.00175	0.869778	0.000127	1.02692	0.000149	2.28932e-08	9.45e-09	1.46479e-07	3.52e-10	0.0010451	1.71e-06	0.0487582	0.000176	14.2743	0.0552	0.00856912	1.25e-05	0.282568	1.04e-05	1.46661	2.91e-05	1.88707	4.14e-05	7.13217	0.00837	0.0783853	0.000305	0.0522985	0.000108	0.00304997	6.66e-06	4.4772e-05	2.02e-05	-0.000959902	0	-0.00319043	2.26e-11	-0.00429013	2.61e-11	-0.00605605	2.64e-11	-0.00306136	0	-0.0049189	1.6e-11
BFB1-038_3585	2019-06-03 14:20:31	0.74444	1.45e-05	-1.43689	0.00173	0.869476	0.000189	1.02724	0.000221	5.95221e-08	1.1e-08	1.47207e-07	6.82e-10	0.000733324	2.88e-07	0.0327236	4.75e-05	9.57553	0.0205	0.00858564	1.22e-05	0.282591	1.06e-05	1.46657	2.95e-05	1.88698	4.14e-05	6.90398	0.00938	0.0506556	6.93e-05	0.0356777	4.69e-05	0.0029636	1.28e-05	0.000130681	2.29e-05	-0.000951765	0	-0.00316912	0	-0.00429094	0	-0.00603721	1.11e-11	-0.00306761	5.51e-12	-0.00492692	2.77e-11
BFB1-041_3586	2019-06-03 14:21:45	0.744422	1.65e-05	-1.43457	0.00197	0.869946	0.000173	1.02673	0.000203	1.52734e-08	1.01e-08	1.56319e-07	4.5e-10	0.000846537	3.64e-06	0.0358221	6.32e-05	10.4496	0.0241	0.00861442	1.23e-05	0.28259	1.04e-05	1.46657	3.3e-05	1.88693	4.36e-05	6.85151	0.0085	0.0552053	0.000102	0.0403286	0.000162	0.00311007	9.1e-06	2.56836e-05	2.09e-05	-0.000974854	7.03e-12	-0.00319031	0	-0.00429176	8.46e-12	-0.0060789	2.05e-11	-0.00306422	2.26e-11	-0.00490845	2.23e-11
BFB1-046_3587	2019-06-03 14:22:58	0.744381	1.29e-05	-1.42959	0.00153	0.870236	0.000173	1.02639	0.000203	-3.35105e-08	8.7e-09	1.68497e-07	8.08e-10	0.000686902	9.5e-07	0.0317082	0.00011	9.22816	0.0342	0.00864443	1.06e-05	0.282565	9.49e-06	1.46656	2.55e-05	1.88686	3.5e-05	7.9236	0.0129	0.0565003	0.000274	0.0383748	0.000115	0.00387898	2.42e-05	-7.56604e-05	2.09e-05	-0.000960576	0	-0.0031549	0	-0.00425747	0	-0.00603675	0	-0.00306597	1.51e-11	-0.00490076	2.25e-11
FC1_3546	2019-05-13 14:31:14	0.744891	3.14e-05	-1.49049	0.00374	0.869049	0.000897	1.02775	0.00106	8.03771e-08	3.8e-08	2.49877e-08	1.03e-09	0.00078866	1.08e-06	0.023553	0.00012	6.97655	0.0564	0.00864686	4.36e-05	0.282189	2.93e-05	1.46648	5.5e-05	1.88675	9.9e-05	2.79497	0.00492	0.0147747	7.11e-05	0.0154537	2.34e-05	0.000204029	8.36e-06	5.73266e-05	3.24e-05	-0.000932695	6.91e-12	-0.00316408	0	-0.00425921	0	-0.00601992	0	-0.00307395	1.67e-11	-0.00488051	2.3e-11
FC10_3613	2019-05-13 14:34:41	0.744482	2.9e-05	-1.4417	0.00347	0.867922	0.00137	1.02859	0.00163	-3.94022e-08	3.41e-08	2.98579e-08	9.02e-10	0.000474068	5.94e-07	0.0146889	2.95e-05	4.33058	0.0219	0.00860782	3.37e-05	0.282089	2.45e-05	1.46651	4.61e-05	1.8869	8.93e-05	2.61383	0.0146	0.00871114	6.46e-05	0.00874595	4.07e-05	0.000224205	6.99e-06	-4.49395e-05	2.66e-05	-0.000994296	0	-0.0031857	0	-0.00431019	0	-0.00606313	2.49e-11	-0.00309647	0	-0.00489709	0
FC12_3628	2019-05-13 15:12:25	0.744468	3e-05	-1.44005	0.00358	0.869313	0.000764	1.02762	0.000899	2.17208e-08	3.5e-08	3.04569e-08	1.02e-09	0.000846786	2.88e-06	0.0271115	3.33e-05	7.91341	0.0435	0.00860206	4.17e-05	0.282151	2.73e-05	1.46652	4.75e-05	1.88681	9.34e-05	2.50117	0.0155	0.0153304	7.89e-05	0.0148861	4.29e-05	0.000221199	7.43e-06	2.60341e-05	2.62e-05	-0.000960742	0	-0.00319734	2.14e-12	-0.00429392	2.77e-11	-0.00604645	3.59e-11	-0.00306575	9.83e-12	-0.00493581	0
FC13_3636	2019-05-13 15:13:59	0.744487	2.83e-05	-1.44231	0.00338	0.870926	0.000729	1.0256	0.00085	-2.08613e-08	3.75e-08	2.8209e-08	1.08e-09	0.000849292	6.37e-07	0.0283441	6.28e-05	8.26866	0.0479	0.00869401	4.02e-05	0.282239	2.71e-05	1.46643	4.98e-05	1.88691	8.93e-05	2.50045	0.0103	0.0160808	9.97e-05	0.0149342	5.47e-05	0.000207088	7.99e-06	-6.44493e-06	2.78e-05	-0.000979922	2.67e-12	-0.00317038	1.77e-11	-0.00428883	1.4e-11	-0.00605541	0	-0.00307167	1.67e-11	-0.00494581	3.01e-11
FC14_3637	2019-05-13 15:16:04	0.744524	2.9e-05	-1.4467	0.00346	0.868681	0.000626	1.0284	0.000741	-1.02031e-08	3.55e-08	2.45113e-08	9.31e-10	0.000893662	5.75e-07	0.0287417	5.98e-05	8.45547	0.0392	0.0085518	3.38e-05	0.282186	2.62e-05	1.46656	4.62e-05	1.88684	8.67e-05	2.62971	0.0137	0.0171587	0.000124	0.0165441	7.88e-05	0.000190376	7.45e-06	-2.44666e-05	2.75e-05	-0.00098642	3.82e-12	-0.00322181	2.53e-11	-0.00430577	0	-0.0060544	1.21e-11	-0.00309489	0	-0.0049341	0
FC15_3643	2019-05-13 15:20:15	0.744559	3.24e-05	-1.45092	0.00387	0.871362	0.000824	1.02502	0.000975	-1.22241e-07	4e-08	2.10432e-08	1.2e-09	0.000901051	6.05e-07	0.0309201	9.2e-05	9.07827	0.0624	0.00866405	4.75e-05	0.282307	2.88e-05	1.46662	4.91e-05	1.88677	0.000106	2.13129	0.00873	0.0149741	0.000104	0.0135302	5.17e-05	0.000130325	7.51e-06	-7.44531e-05	2.54e-05	-0.00104177	0	-0.00321914	0	-0.0043233	9.72e-12	-0.00609011	0	-0.003171	0	-0.00497678	0
FC16_3644	2019-05-13 15:21:42	0.744536	3.2e-05	-1.44814	0.00382	0.869083	0.0013	1.02833	0.00154	4.74323e-08	4.32e-08	2.03874e-08	1.05e-09	0.000568083	5.88e-07	0.0178102	4.73e-05	5.31539	0.0361	0.00849575	4.8e-05	0.282083	2.96e-05	1.46656	5.44e-05	1.88662	9.96e-05	2.20628	0.00972	0.00892419	6.29e-05	0.00881967	3.56e-05	0.000131068	6.68e-06	2.99638e-05	2.84e-05	-0.001047	0	-0.00325259	2.12e-11	-0.00435481	0	-0.00610251	0	-0.00315343	0	-0.00497352	3.04e-11
FC17_3645	2019-05-13 15:24:50	0.744619	3.37e-05	-1.45803	0.00402	0.870906	0.00091	1.0257	0.00106	1.81504e-07	4.6e-08	2.47551e-08	1.29e-09	0.000906659	6.68e-07	0.0300224	0.000111	8.69137	0.0681	0.00874253	5.27e-05	0.282255	3.15e-05	1.46672	5.46e-05	1.88678	0.000112	1.91996	0.0107	0.0130956	0.000118	0.012236	7.03e-05	0.000136282	7.4e-06	0.000107854	2.65e-05	-0.00104027	0	-0.00324289	1.24e-11	-0.00435086	0	-0.006123	1.36e-11	-0.00317538	0	-0.00497697	0
FC18_3652	2019-05-13 15:26:34	0.744337	3.14e-05	-1.42434	0.00375	0.869602	0.0012	1.02715	0.00143	-7.90025e-08	4.33e-08	2.17719e-08	1.17e-09	0.000618799	5.22e-07	0.0195984	3.96e-05	5.72762	0.035	0.00863314	4.49e-05	0.282105	3.11e-05	1.4665	4.71e-05	1.88698	9.94e-05	2.18373	0.011	0.00973433	6.73e-05	0.00951551	4.58e-05	0.000136124	7.52e-06	-4.48969e-05	2.81e-05	-0.00103203	7.3e-12	-0.00325119	0	-0.00434661	0	-0.00611265	0	-0.0031498	0	-0.00495187	0
FC19_3659	2019-05-13 15:28:29	0.744465	3e-05	-1.43963	0.00358	0.87036	0.000926	1.02653	0.0011	-9.41405e-08	4.24e-08	2.10208e-08	1.16e-09	0.000783984	3.52e-06	0.0259601	4.4e-05	7.55329	0.0483	0.00864679	4.67e-05	0.282146	3.2e-05	1.4665	5.42e-05	1.88649	0.000101	2.08558	0.00954	0.0121264	3.99e-05	0.0114465	1.42e-05	0.000126783	7.14e-06	-6.76659e-05	2.63e-05	-0.00103933	5.85e-12	-0.00325415	1.07e-11	-0.00434104	0	-0.00610454	3.94e-11	-0.00314416	1.98e-11	-0.00495794	2.65e-11
FC2_3547	2019-05-13 14:38:03	0.744977	3.52e-05	-1.50076	0.0042	0.869745	0.00102	1.02719	0.00122	-5.50696e-08	3.95e-08	1.95986e-08	1.16e-09	0.000748292	1.8e-06	0.0241454	3.61e-05	7.07911	0.0443	0.00858962	4.66e-05	0.282102	2.86e-05	1.46661	6.21e-05	1.88695	0.000102	2.61224	0.012	0.0141784	6.76e-05	0.0137059	3.57e-05	0.000149151	8.75e-06	-3.03691e-05	3.08e-05	-0.000933934	0	-0.00315358	2.1e-11	-0.00426231	0	-0.00602406	0	-0.00306055	1.91e-11	-0.00487276	0
FC20_3665	2019-05-13 15:30:10	0.744335	3.5e-05	-1.4241	0.00418	0.868453	0.00122	1.02851	0.00142	4.42919e-08	4.63e-08	1.83922e-08	1.25e-09	0.000684256	1.21e-06	0.0222194	8.34e-05	6.60677	0.0488	0.00857262	4.86e-05	0.282146	3.32e-05	1.46643	5.46e-05	1.8867	0.000102	1.9775	0.00892	0.0100182	8.2e-05	0.00952691	5.89e-05	0.00010678	7.22e-06	2.60213e-05	2.7e-05	-0.00102994	2.73e-12	-0.00322442	0	-0.00435403	0	-0.00608758	0	-0.00312063	8.01e-12	-0.00496196	0
FC21_3676	2019-05-13 15:31:46	0.744526	3.01e-05	-1.44696	0.0036	0.871345	0.000795	1.02512	0.000936	1.14588e-07	3.52e-08	1.59167e-08	8.97e-10	0.000799444	4.51e-07	0.0265291	7.7e-05	7.86328	0.049	0.00854346	4.22e-05	0.282217	2.63e-05	1.46649	4.48e-05	1.88657	9.3e-05	2.5324	0.0145	0.0153654	0.000133	0.0142682	8.42e-05	0.000121656	6.67e-06	7.76462e-05	2.67e-05	-0.00103614	0	-0.00321801	1.25e-11	-0.00434857	0	-0.0061015	3.66e-11	-0.00311363	1.06e-11	-0.00496277	0
FC22_3677	2019-05-13 15:33:19	0.744447	2.96e-05	-1.43788	0.00351	0.869633	0.00131	1.02713	0.00155	2.5059e-08	3.54e-08	3.15391e-08	1.01e-09	0.000496021	4.29e-07	0.0158124	4.03e-05	4.62608	0.0277	0.00862589	3.89e-05	0.282197	2.56e-05	1.46667	4.56e-05	1.88685	8.7e-05	2.5536	0.0157	0.00916509	7.85e-05	0.00890258	5.39e-05	0.000235008	7.6e-06	1.6985e-05	2.71e-05	-0.00102967	5.67e-12	-0.00323313	1.88e-11	-0.00433332	8.44e-12	-0.00608004	3.23e-11	-0.00314375	1.68e-11	-0.0049633	1.94e-11
FC3_3560	2019-05-13 14:55:00	0.744851	3.84e-05	-1.48575	0.00458	0.868184	0.00143	1.02954	0.00169	2.63042e-08	4.54e-08	1.24879e-08	1.34e-09	0.000687412	1e-05	0.0233174	0.000417	6.82328	0.13	0.00864335	5.1e-05	0.282136	3.42e-05	1.46659	5.91e-05	1.88683	0.000119	2.07768	0.00628	0.0110406	0.000224	0.0101269	0.000173	7.78129e-05	8.02e-06	3.31368e-05	2.88e-05	-0.00100144	0	-0.00321352	0	-0.0043314	2.8e-11	-0.00608136	4.2e-11	-0.00312933	1.42e-11	-0.00494082	2.43e-11
FC4_3567	2019-05-13 14:56:42	0.74494	3.43e-05	-1.49636	0.0041	0.868166	0.00115	1.0289	0.00136	-1.02614e-07	3.9e-08	1.28898e-08	1.06e-09	0.000587961	4.75e-07	0.0188566	7.84e-05	5.48619	0.0392	0.00870896	4.46e-05	0.282133	3.24e-05	1.46656	5.81e-05	1.88694	0.00011	2.67063	0.00891	0.011408	8.19e-05	0.0110377	4.14e-05	0.000102583	8.06e-06	-8.58241e-05	3.12e-05	-0.000995726	5.46e-12	-0.00323343	1.25e-11	-0.00432822	0	-0.00609711	3.18e-11	-0.00309468	0	-0.00493601	2.77e-11
FC6_3582	2019-05-13 15:00:25	0.745028	2.66e-05	-1.50687	0.00317	0.869419	0.00097	1.02775	0.00115	2.12946e-08	3.51e-08	3.39182e-08	1.95e-09	0.000724738	1.96e-06	0.0215991	0.000111	6.31915	0.0472	0.00871903	3.88e-05	0.282264	2.45e-05	1.46677	4.68e-05	1.88665	8.41e-05	2.34869	0.0228	0.0115463	0.000162	0.0120135	0.000131	0.00018522	8.95e-06	-1.84257e-05	2.13e-05	-0.000932915	0	-0.00317397	1.21e-11	-0.00426299	0	-0.00603343	0	-0.00305573	0	-0.00489237	0
FC7_3589	2019-05-13 15:03:10	0.744981	3.48e-05	-1.50175	0.00413	0.870133	0.00284	1.02737	0.00337	1.07896e-08	5.37e-08	5.71348e-08	2.59e-09	0.000418578	2.36e-06	0.0108973	7.51e-05	3.24412	0.0354	0.00859087	5.98e-05	0.282275	3.85e-05	1.46635	5.58e-05	1.88631	0.000112	1.66109	0.00447	0.00405866	3.46e-05	0.00483525	3.33e-05	0.000283081	1.37e-05	-2.8702e-06	2.76e-05	-0.00096281	0	-0.00318621	0	-0.0042795	0	-0.00604812	0	-0.00307487	0	-0.00490989	2.3e-11
FC8maybe_3596	2019-05-13 15:06:18	0.74451	2.77e-05	-1.44504	0.00331	0.868595	0.000799	1.02863	0.000947	-3.75386e-08	3.09e-08	2.9562e-08	9.59e-10	0.000753441	1.34e-06	0.024161	4.78e-05	7.1383	0.0367	0.00855615	3.61e-05	0.282109	2.46e-05	1.46658	4.46e-05	1.88708	9.09e-05	2.64655	0.0108	0.0144753	8.18e-05	0.0140263	3.88e-05	0.000225454	7.35e-06	-3.67421e-05	2.46e-05	-0.000966862	2.48e-12	-0.00319232	1.03e-11	-0.00430881	0	-0.00604333	1.18e-11	-0.00305521	0	-0.00491007	0
FC9_3606	2019-05-13 15:10:06	0.744643	3.07e-05	-1.46087	0.00366	0.871976	0.00163	1.0241	0.00187	-3.35351e-08	4.71e-08	2.76386e-08	1.24e-09	0.000492994	1.34e-06	0.0148548	3.32e-05	4.29676	0.0293	0.00871186	4.52e-05	0.2822	3.19e-05	1.46657	5.66e-05	1.88646	9.66e-05	2.32466	0.0351	0.00785307	0.000127	0.00801766	0.000105	0.000187696	8.38e-06	-1.11986e-05	2.95e-05	-0.000975206	0	-0.00316992	1.04e-11	-0.00426886	0	-0.00603745	0	-0.00306096	1.77e-11	-0.00489538	1.87e-11
ples1_3549	2019-05-14 12:56:53	0.744839	3.05e-05	-1.48426	0.00364	0.872609	0.00385	1.02495	0.00453	1.25848e-08	3.48e-08	6.94102e-08	1.05e-09	0.000146816	6.01e-07	0.00574292	2.8e-05	1.69158	0.0147	0.00858615	4.23e-05	0.282443	2.81e-05	1.46655	5.5e-05	1.88692	9.7e-05	2.76575	0.00893	0.0035953	2.59e-05	0.00286158	1.71e-05	0.000558373	8.58e-06	6.63401e-06	2.92e-05	-0.000956674	0	-0.00315799	0	-0.00425501	0	-0.00600367	0	-0.00305492	2.36e-11	-0.00487373	0
ples10_3581	2019-05-14 13:16:03	0.744958	2.55e-05	-1.49842	0.00304	0.86741	0.00282	1.02997	0.00333	5.19392e-08	3.33e-08	1.87931e-07	9.3e-10	0.000166206	4.14e-07	0.00678755	1.52e-05	1.97543	0.0123	0.00869893	3.7e-05	0.282494	2.47e-05	1.46648	4.13e-05	1.88638	7.84e-05	2.17213	0.0155	0.00332674	2.81e-05	0.00254225	1.84e-05	0.00118928	1.16e-05	3.52867e-05	2.09e-05	-0.000925516	2.67e-12	-0.0031749	1.74e-11	-0.00426463	1.73e-11	-0.00603335	1.54e-11	-0.00305441	0	-0.0048712	0
ples11_3588	2019-05-14 13:18:22	0.74466	2.83e-05	-1.46294	0.00338	0.86931	0.00382	1.02791	0.00449	-7.72647e-08	3.81e-08	1.35082e-07	9.9e-10	0.000131026	4.58e-07	0.00548633	1.78e-05	1.61476	0.0117	0.00860939	3.96e-05	0.282403	2.5e-05	1.46656	4.8e-05	1.88703	8.63e-05	2.45011	0.0131	0.00304218	2.34e-05	0.00225823	1.48e-05	0.000966441	9.47e-06	-5.5556e-05	2.83e-05	-0.000972384	5.32e-12	-0.00317786	2.4e-11	-0.00428253	0	-0.00604866	1.69e-11	-0.0030623	1.37e-11	-0.00489766	0
ples12_3595	2019-05-14 13:22:55	0.744586	2.85e-05	-1.45416	0.0034	0.872205	0.00621	1.02888	0.0073	4.55193e-08	3.51e-08	7.35461e-08	1.01e-09	8.63932e-05	4.4e-07	0.00336238	1.74e-05	0.981184	0.0092	0.00861502	4.25e-05	0.282481	2.74e-05	1.46661	4.78e-05	1.88692	9.02e-05	2.5042	0.0185	0.00189644	1.98e-05	0.00153394	1.42e-05	0.000537968	8.87e-06	4.93278e-05	2.62e-05	-0.000975766	6.67e-12	-0.00314738	1.9e-11	-0.00428967	1.21e-11	-0.0060184	1.71e-11	-0.00307739	1e-11	-0.00490021	0
ples13_3605	2019-05-14 13:28:28	0.744571	3.19e-05	-1.45229	0.0038	0.884307	0.00508	1.01017	0.00572	3.70838e-08	4.07e-08	1.07482e-07	1.11e-09	0.000107292	4.81e-07	0.00445867	2.09e-05	1.29456	0.0118	0.00877918	4.39e-05	0.282453	2.87e-05	1.46661	5.59e-05	1.88687	9.5e-05	2.29644	0.0079	0.00232772	1.7e-05	0.00173473	1.05e-05	0.000718032	8.08e-06	2.01466e-05	2.8e-05	-0.00096399	0	-0.00317487	2.09e-11	-0.00426418	0	-0.00604198	3.65e-11	-0.00305663	0	-0.00490804	0
ples14_3612	2019-05-14 13:30:20	0.744622	3e-05	-1.45836	0.00358	0.87352	0.0078	1.03127	0.00909	1.16844e-07	3.45e-08	5.9866e-08	9.78e-10	7.26255e-05	4.76e-07	0.00292619	1.75e-05	0.85448	0.00882	0.00871629	4.1e-05	0.282477	2.78e-05	1.46653	4.85e-05	1.88669	9.16e-05	2.4305	0.00952	0.0016111	1.36e-05	0.00124143	9.98e-06	0.000422398	7.1e-06	8.41906e-05	2.49e-05	-0.000979901	6.6e-12	-0.00318646	0	-0.0042893	0	-0.00605968	0	-0.00309098	2.14e-11	-0.00491318	0
ples15_3619	2019-05-14 13:32:02	0.744514	3.25e-05	-1.44546	0.00388	0.873585	0.00692	1.02381	0.00804	-6.58072e-08	2.86e-08	4.21706e-08	8.89e-10	6.49789e-05	4.12e-07	0.00267412	1.64e-05	0.783582	0.00765	0.00862757	3.69e-05	0.28246	2.41e-05	1.46656	4.44e-05	1.88691	9.37e-05	2.7764	0.00593	0.00166709	1.22e-05	0.00126022	8.14e-06	0.000339353	7.42e-06	-6.67141e-05	2.4e-05	-0.000995308	0	-0.00319035	1.05e-11	-0.00430784	0	-0.00603767	3.88e-11	-0.00307183	1.9e-11	-0.0049068	2.04e-11
ples16_3620	2019-05-14 13:35:34	0.744568	2.86e-05	-1.45191	0.00341	0.870012	0.000722	1.02679	0.000849	9.82685e-08	3.23e-08	2.52511e-08	8.98e-10	0.000867943	7.01e-07	0.0280804	6.71e-05	8.23065	0.0474	0.00862531	4.13e-05	0.282202	2.69e-05	1.46658	4.51e-05	1.88679	8.78e-05	2.57872	0.012	0.0163631	0.000115	0.0157406	6.4e-05	0.000188479	6.76e-06	7.908e-05	2.53e-05	-0.000989161	0	-0.00317305	0	-0.00429217	0	-0.00605077	2.31e-11	-0.00309044	0	-0.00492632	9.77e-12
ples16B_3627	2019-05-14 13:37:49	0.744505	3.18e-05	-1.4444	0.0038	0.89166	0.00854	1.00949	0.00955	-4.12626e-08	4.31e-08	5.73857e-08	1.09e-09	6.48979e-05	4.69e-07	0.00278662	1.69e-05	0.813947	0.00878	0.00864508	4.42e-05	0.282505	2.87e-05	1.4665	5.96e-05	1.88698	9.71e-05	2.23226	0.00598	0.00140114	9.88e-06	0.00103378	7.71e-06	0.000374867	7.3e-06	-3.04438e-05	2.87e-05	-0.000999899	5.79e-12	-0.00320002	1.26e-11	-0.00427984	0	-0.00604226	2.41e-11	-0.0030785	0	-0.00494325	2.66e-11
ples17_3631	2019-05-14 13:40:14	0.744536	3.15e-05	-1.44808	0.00376	0.87644	0.00285	1.01987	0.00326	-1.6328e-08	3.99e-08	2.16019e-07	1.02e-09	0.00017891	4.63e-07	0.00744593	1.73e-05	2.17245	0.0149	0.00863745	4.19e-05	0.282485	2.68e-05	1.46662	4.91e-05	1.88666	9.44e-05	2.49665	0.0158	0.00418927	3.25e-05	0.00314116	2.05e-05	0.00156753	1.39e-05	1.00521e-05	3e-05	-0.00100379	5.51e-12	-0.00318439	9.58e-12	-0.00430356	9.06e-12	-0.00605377	2.57e-11	-0.00307504	0	-0.00492441	0
ples18_3632	2019-05-14 13:41:58	0.744536	3.26e-05	-1.44809	0.0039	0.86373	0.0027	1.03387	0.00318	6.78373e-08	3.73e-08	2.31979e-07	1.18e-09	0.00018339	4.47e-07	0.0077767	2.24e-05	2.27298	0.0162	0.00863126	4.26e-05	0.282486	2.51e-05	1.46649	5.09e-05	1.8868	9.75e-05	2.37882	0.0112	0.00416567	2.98e-05	0.00306728	1.55e-05	0.00160554	1.38e-05	4.2892e-05	2.67e-05	-0.000967457	5.9e-12	-0.0032127	1.65e-11	-0.00430299	2.85e-11	-0.00606244	4.23e-11	-0.00307116	1.1e-11	-0.00493593	0
ples19_3633	2019-05-14 13:44:02	0.744536	3.41e-05	-1.44815	0.00407	0.871219	0.00288	1.02627	0.00335	1.0583e-07	4.21e-08	2.0637e-07	1.19e-09	0.000173635	4.71e-07	0.00740798	2.07e-05	2.1672	0.0148	0.00863655	4.05e-05	0.28251	2.97e-05	1.46669	5.62e-05	1.88671	0.000103	2.28343	0.0127	0.00383485	2.92e-05	0.00278833	1.67e-05	0.00137173	1.24e-05	6.864e-05	2.87e-05	-0.000984356	0	-0.00319349	0	-0.00430046	0	-0.0060641	2.49e-11	-0.00307244	0	-0.00491208	0
ples2_3550	2019-05-14 12:58:45	0.744975	3.43e-05	-1.50047	0.00409	0.89054	0.00675	1.00237	0.0076	1.23404e-08	4.03e-08	9.50988e-08	1.16e-09	9.41028e-05	5.71e-07	0.00391226	2.74e-05	1.13977	0.0133	0.00869079	5.05e-05	0.282556	3.32e-05	1.46645	5.75e-05	1.88658	0.000111	2.42464	0.00806	0.00214136	2.06e-05	0.00160805	1.31e-05	0.00067281	9.35e-06	4.54645e-07	2.9e-05	-0.00101128	0	-0.00323252	1.51e-11	-0.00430955	0	-0.00607786	3.3e-11	-0.00312984	0	-0.00495162	1.09e-11
ples20_3634	2019-05-14 13:45:58	0.744498	3.29e-05	-1.44362	0.00393	0.872516	0.0029	1.02519	0.00343	-7.228e-08	4.28e-08	2.19611e-07	1.36e-09	0.000179114	5.48e-07	0.00789875	2.69e-05	2.32011	0.0188	0.00864009	4.86e-05	0.282456	3.12e-05	1.46672	5.04e-05	1.88715	9.91e-05	2.17329	0.00826	0.00389043	2.63e-05	0.00274563	1.35e-05	0.00139205	1.19e-05	-4.56219e-05	2.78e-05	-0.0010071	8.24e-12	-0.00320987	9.3e-12	-0.00429942	0	-0.0060529	0	-0.00309412	0	-0.00492703	2.89e-11
ples21_3635	2019-05-14 13:49:39	0.744616	3.28e-05	-1.45764	0.00392	0.881947	0.00307	1.01293	0.0036	-7.18566e-10	4.25e-08	1.93518e-07	1.12e-09	0.000168113	4.75e-07	0.007123	2.08e-05	2.05937	0.016	0.00875732	4.61e-05	0.282548	3.02e-05	1.46658	5.8e-05	1.88661	9.88e-05	2.30307	0.00936	0.00370059	2.29e-05	0.00273069	1.3e-05	0.00129009	9.69e-06	5.11527e-06	2.95e-05	-0.00100897	0	-0.00325515	3.01e-12	-0.00428174	0	-0.00606475	3.58e-11	-0.00308152	0	-0.00493595	2.48e-11
ples22_3638	2019-05-14 13:51:43	0.744549	3.05e-05	-1.44971	0.00364	0.875186	0.00406	1.02051	0.00488	3.1852e-08	3.8e-08	7.06763e-08	9.08e-10	0.000111906	4.97e-07	0.00467344	1.5e-05	1.34263	0.00979	0.00873086	3.97e-05	0.282573	2.81e-05	1.4666	5.39e-05	1.88704	9.55e-05	2.58423	0.0209	0.0027212	2.24e-05	0.00204166	1.56e-05	0.000536521	8.27e-06	3.62537e-05	2.86e-05	-0.00102958	0	-0.00324204	4.61e-12	-0.00432153	0	-0.00608081	0	-0.00315567	1.75e-11	-0.0049921	0
ples23_3639	2019-05-14 13:53:40	0.744532	2.91e-05	-1.4477	0.00347	0.867818	0.004	1.02803	0.00474	-9.03253e-08	3.34e-08	7.66382e-08	9.96e-10	0.000122446	5.53e-07	0.00501913	1.77e-05	1.47149	0.011	0.00865539	3.73e-05	0.282428	2.56e-05	1.46663	5e-05	1.8869	9.14e-05	2.6036	0.0164	0.0029834	2.12e-05	0.00223829	1.22e-05	0.000579364	9.02e-06	-5.74138e-05	2.61e-05	-0.00102249	0	-0.00322919	0	-0.00434769	2.53e-11	-0.0061069	0	-0.00314896	1.55e-11	-0.00496261	3.73e-11
ples24_3640	2019-05-14 13:55:45	0.744568	3.32e-05	-1.45192	0.00396	0.880758	0.00501	1.01564	0.00589	-7.73746e-08	3.69e-08	8.33927e-08	1.27e-09	0.00010542	1.15e-06	0.00412979	3.83e-05	1.1843	0.013	0.00879302	3.95e-05	0.28258	2.69e-05	1.46678	5.86e-05	1.88707	9.92e-05	2.92269	0.0163	0.00269004	2.29e-05	0.00210734	1.84e-05	0.000703379	1.11e-05	-5.83628e-05	3.16e-05	-0.00105824	4.85e-12	-0.00324067	0	-0.00434597	1.59e-11	-0.00610499	2.79e-11	-0.0031433	1.1e-11	-0.00500588	2.69e-11
ples25_3641	2019-05-14 13:58:09	0.744472	2.85e-05	-1.44045	0.0034	0.86642	0.00442	1.03251	0.00517	9.80385e-08	3.86e-08	8.88235e-08	1.6e-09	0.000105458	1.02e-06	0.00430325	4.27e-05	1.26671	0.0149	0.00860618	3.46e-05	0.282438	2.54e-05	1.46655	4.52e-05	1.8871	8.71e-05	2.62816	0.0115	0.00257957	3.15e-05	0.00194698	2.13e-05	0.000694315	1.39e-05	6.80232e-05	3.02e-05	-0.00104151	0	-0.00325857	0	-0.00436147	3.42e-12	-0.00610431	0	-0.00316117	7.26e-12	-0.00498015	3.11e-11
ples26_3642	2019-05-14 14:01:59	0.744548	2.86e-05	-1.44953	0.00342	0.862938	0.00488	1.03967	0.00604	-1.23167e-08	3.39e-08	8.42883e-08	1.65e-09	0.000101419	1.05e-06	0.00414372	4.47e-05	1.2313	0.0151	0.00854752	3.71e-05	0.282397	2.61e-05	1.46656	4.83e-05	1.88685	8.06e-05	2.64218	0.014	0.00252281	3.56e-05	0.00191041	2.48e-05	0.000655383	1.43e-05	-2.1139e-05	2.66e-05	-0.00102245	3.86e-12	-0.00323949	0	-0.00435364	6.16e-12	-0.00608795	0	-0.00315564	1.84e-11	-0.00496979	0
ples27_3651	2019-05-14 14:03:58	0.744449	2.88e-05	-1.43771	0.00344	0.878086	0.00513	1.0202	0.00601	3.16139e-08	3.19e-08	5.06955e-08	1.24e-09	9.24657e-05	9.58e-07	0.00353125	3.24e-05	1.02543	0.0113	0.00865235	3.41e-05	0.282492	2.56e-05	1.46663	4.79e-05	1.88676	8.71e-05	2.75359	0.0236	0.002157	1.52e-05	0.0017647	1.28e-05	0.000401359	8.6e-06	2.05711e-05	2.59e-05	-0.0010445	9.56e-13	-0.00322555	0	-0.00435174	2.11e-11	-0.00608877	0	-0.00314095	0	-0.00496968	0
ples28_3658	2019-05-14 14:05:56	0.744421	2.39e-05	-1.43441	0.00285	0.837815	0.00778	1.07627	0.0105	2.36675e-08	2.78e-08	1.78106e-08	9.41e-10	5.04073e-05	5.73e-07	0.0018409	2e-05	0.548412	0.00724	0.00859606	2.96e-05	0.282456	1.98e-05	1.46669	4.56e-05	1.88686	7.47e-05	3.29525	0.025	0.00138248	1.13e-05	0.00119025	9.98e-06	0.000166285	8.27e-06	3.96811e-05	2.72e-05	-0.00101124	5.1e-12	-0.00325623	2.07e-11	-0.00435414	1.08e-11	-0.0061054	2.67e-11	-0.00315073	1.86e-11	-0.00497369	8.58e-12
ples28B_3664	2019-05-14 14:07:36	0.744311	2.93e-05	-1.42123	0.0035	0.866418	0.00447	1.03004	0.0052	1.38154e-07	3.14e-08	7.58508e-08	1.5e-09	0.000104921	1.07e-06	0.00399019	4.23e-05	1.1854	0.0143	0.00854652	3.53e-05	0.282455	2.43e-05	1.46665	4.72e-05	1.88719	9.07e-05	2.74064	0.0147	0.00252093	3.27e-05	0.00205461	2.48e-05	0.000614448	1.31e-05	0.000102873	2.52e-05	-0.00105514	0	-0.00325762	0	-0.00437475	0	-0.0061147	0	-0.00316097	0	-0.0049779	2.88e-11
ples29_3671	2019-05-14 14:09:21	0.744402	3.03e-05	-1.43219	0.00362	0.871955	0.0046	1.02782	0.0055	6.47361e-08	3.37e-08	8.21112e-08	1.58e-09	0.000105251	1.2e-06	0.00401445	5.08e-05	1.16752	0.016	0.00873047	3.44e-05	0.282456	2.42e-05	1.4668	5.35e-05	1.8868	8.78e-05	2.64067	0.0169	0.00246337	4.19e-05	0.00199706	3.1e-05	0.00064497	1.44e-05	4.64906e-05	2.62e-05	-0.00103906	5.36e-12	-0.00326215	0	-0.0043341	0	-0.00612188	0	-0.00314076	1.16e-11	-0.0049672	0
ples3_3551	2019-05-14 13:00:59	0.744912	3.3e-05	-1.49294	0.00394	0.867732	0.00846	1.03697	0.00999	1.59653e-07	3.95e-08	5.5124e-08	1.04e-09	6.74702e-05	5.67e-07	0.00279748	2.01e-05	0.81443	0.0093	0.00861643	4.35e-05	0.28245	3.21e-05	1.46649	5.67e-05	1.88685	0.000102	2.44755	0.00537	0.00154466	1.35e-05	0.00115788	1.07e-05	0.000393347	7.64e-06	0.000108566	2.89e-05	-0.000998149	6.53e-12	-0.00320224	2.53e-11	-0.00432014	3.32e-11	-0.00606661	2.58e-11	-0.00309884	0	-0.00493593	0
ples30_3672	2019-05-14 14:11:10	0.744321	2.94e-05	-1.42245	0.00351	0.862536	0.00503	1.03825	0.00621	1.41282e-07	3.56e-08	6.26069e-08	1.13e-09	0.000102103	9.17e-07	0.00383904	3.27e-05	1.12377	0.012	0.00862311	3.81e-05	0.282461	2.59e-05	1.46669	5.58e-05	1.88726	9.02e-05	2.68552	0.0248	0.0022823	2.43e-05	0.00188767	1.82e-05	0.000474004	8.74e-06	0.000135865	2.82e-05	-0.00102521	8.34e-12	-0.00326351	0	-0.00433628	0	-0.00609803	0	-0.0031563	0	-0.00497078	2.1e-11
ples31_3673	2019-05-14 14:13:00	0.74435	2.77e-05	-1.42589	0.0033	0.876038	0.00527	1.02141	0.00633	1.09548e-07	3.09e-08	8.66302e-08	1.79e-09	0.000103023	1.16e-06	0.00399481	4.99e-05	1.17331	0.0162	0.00861324	3.69e-05	0.282424	2.3e-05	1.46661	4.72e-05	1.88698	8.11e-05	2.71987	0.0145	0.00251644	3.94e-05	0.00202388	2.87e-05	0.000701939	1.6e-05	9.50999e-05	2.55e-05	-0.00105682	5.9e-12	-0.00327055	9.07e-12	-0.00435307	0	-0.006099	2.89e-11	-0.00314746	2.47e-11	-0.00496405	0
ples32_3674	2019-05-14 14:14:33	0.744428	2.99e-05	-1.43527	0.00357	0.870356	0.00481	1.02814	0.00558	-1.08295e-07	3.21e-08	9.04581e-08	1.7e-09	0.000107517	1.23e-06	0.00413217	4.83e-05	1.20582	0.0158	0.00866388	3.55e-05	0.282484	2.5e-05	1.46662	4.72e-05	1.88668	9.16e-05	2.77256	0.022	0.00264403	4.09e-05	0.00214143	3.17e-05	0.000744168	1.62e-05	-8.19032e-05	2.68e-05	-0.000995799	4.46e-12	-0.00324441	0	-0.0043376	1.93e-11	-0.00607686	3.14e-11	-0.00309785	0	-0.00496271	3.04e-11
ples33_3675	2019-05-14 14:16:50	0.744323	3.11e-05	-1.42272	0.00372	0.865722	0.00457	1.0336	0.00544	6.09305e-08	3.71e-08	9.42939e-08	1.65e-09	0.000104927	8.94e-07	0.00430803	4.52e-05	1.26656	0.0156	0.0085379	3.62e-05	0.282504	2.74e-05	1.4667	5.38e-05	1.88682	9.84e-05	2.64308	0.0111	0.00259466	3.12e-05	0.00195903	1.82e-05	0.000728789	1.38e-05	3.94516e-05	2.93e-05	-0.00104034	1.8e-12	-0.00322396	0	-0.00434677	0	-0.00607811	1.99e-11	-0.00312224	1.49e-11	-0.00497403	2.41e-11
ples5_3552	2019-05-14 13:03:33	0.744906	3.36e-05	-1.49231	0.00401	0.873272	0.00329	1.02493	0.00383	2.51478e-07	3.81e-08	1.46181e-07	1.1e-09	0.000169359	5.5e-07	0.00674324	2.26e-05	1.97792	0.0145	0.00865803	4.18e-05	0.282567	3.25e-05	1.4666	6.26e-05	1.88684	0.000104	2.53175	0.0161	0.00383893	3.35e-05	0.00300271	2.1e-05	0.0010724	1.16e-05	0.000183367	2.83e-05	-0.0010095	2.67e-12	-0.00324664	0	-0.0043218	0	-0.00607866	3.12e-11	-0.00312606	0	-0.00494992	0
ples6_3553	2019-05-14 13:06:46	0.744804	3.47e-05	-1.48015	0.00414	0.866441	0.00294	1.03093	0.00346	-4.42346e-08	3.69e-08	2.12644e-07	1.2e-09	0.000189844	5.27e-07	0.00783783	2.5e-05	2.32333	0.0179	0.00857561	4.71e-05	0.282411	2.92e-05	1.46654	5.73e-05	1.88712	0.000103	2.54061	0.012	0.00450964	3.37e-05	0.00339907	1.9e-05	0.00157527	1.37e-05	-2.87742e-05	2.79e-05	-0.000992689	0	-0.00321479	0	-0.00433037	2.82e-11	-0.00607656	0	-0.00311242	0	-0.00493252	6.23e-12
ples7_3559	2019-05-14 13:08:55	0.744897	3.51e-05	-1.49126	0.00419	0.862367	0.00297	1.03544	0.00354	1.1314e-07	4.22e-08	2.15766e-07	1.22e-09	0.000174471	4.88e-07	0.00738026	2.2e-05	2.16462	0.0157	0.00861229	4.36e-05	0.282454	3.18e-05	1.46657	5.92e-05	1.88682	0.000104	2.46848	0.0122	0.00409261	2.91e-05	0.00305323	1.57e-05	0.00155697	1.35e-05	6.38285e-05	3.18e-05	-0.000995373	6.41e-12	-0.00321411	0	-0.00433652	0	-0.00607374	0	-0.00313056	0	-0.00494221	2.02e-11
ples8_3566	2019-05-14 13:11:18	0.74488	3.32e-05	-1.48918	0.00396	0.862989	0.00401	1.03453	0.00483	4.7056e-08	3.87e-08	1.48491e-07	1.21e-09	0.000148666	4.74e-07	0.00605137	2.32e-05	1.77452	0.0145	0.00857578	4.35e-05	0.282478	3.31e-05	1.46659	5.66e-05	1.88696	9.69e-05	2.53226	0.0131	0.00346467	2.82e-05	0.00266991	1.59e-05	0.00109845	1.13e-05	3.44099e-05	2.95e-05	-0.001006	1.24e-12	-0.00322668	2.35e-11	-0.00433103	0	-0.00606996	0	-0.00313217	0	-0.00494114	1.56e-11
ples9_3573	2019-05-14 13:14:08	0.74473	3.6e-05	-1.47133	0.00429	0.874471	0.0034	1.02282	0.00402	-7.02379e-08	3.78e-08	2.02517e-07	1.18e-09	0.000167337	5.08e-07	0.00709899	2.29e-05	2.0523	0.016	0.00870937	4.62e-05	0.282423	3.06e-05	1.46647	5.68e-05	1.88725	0.000101	2.46389	0.00935	0.00394828	2.5e-05	0.00291179	1.31e-05	0.0014527	1.18e-05	-6.6578e-05	2.83e-05	-0.00101715	6.97e-12	-0.00323289	0	-0.0043263	2.15e-11	-0.00607194	4.45e-11	-0.00313474	9.53e-12	-0.00494974	0
QM1.1-001_3598	2019-06-03 14:33:36	0.744514	1.87e-05	-1.44555	0.00223	0.869645	0.000385	1.02709	0.000452	6.93816e-07	2.86e-08	2.89207e-07	1.73e-09	0.000969756	6.11e-06	0.0306684	0.00033	8.97001	0.101	0.00860618	2.13e-05	0.282596	1.49e-05	1.46653	2.79e-05	1.88676	5.95e-05	4.54414	0.00988	0.0313236	0.000368	0.0309595	0.000236	0.00382407	2.41e-05	0.000944532	3.83e-05	-0.000958817	6.28e-12	-0.00319308	0	-0.0042869	2.68e-11	-0.00603094	0	-0.00306364	4.91e-12	-0.00487565	0
QM1.1-006_3601	2019-06-03 14:35:12	0.744344	4.31e-05	-1.42524	0.00514	0.87167	0.000716	1.02449	0.000862	2.02476e-09	6.22e-08	1.79968e-07	1.7e-09	0.00163144	4.41e-06	0.0467006	0.000138	13.319	0.116	0.00883211	6.55e-05	0.282757	4.76e-05	1.4666	7.06e-05	1.88657	0.000138	1.85275	0.0191	0.019712	0.000218	0.0215881	0.000203	0.000961657	1.55e-05	-7.60956e-07	3.23e-05	-0.000991597	0	-0.00317094	9.15e-12	-0.00426252	2.7e-11	-0.00606042	9.37e-12	-0.00306267	1.01e-11	-0.0049273	1.31e-11
QM1.1-010_3602	2019-06-03 14:36:41	0.744362	2.17e-05	-1.42733	0.00259	0.870417	0.000443	1.02619	0.000519	8.83111e-07	3.88e-08	3.12769e-07	5.39e-09	0.00107471	9.27e-06	0.034793	0.000369	10.151	0.121	0.00857646	2.44e-05	0.28256	1.71e-05	1.46658	3.77e-05	1.88709	6.46e-05	4.05929	0.0107	0.0320926	0.000291	0.03077	0.00022	0.00378027	7.85e-05	0.00109198	4.73e-05	-0.000974967	0	-0.00317914	0	-0.00428156	1.12e-11	-0.00603095	0	-0.00308643	0	-0.00489145	2.9e-11
QM1.1-014_3603	2019-06-03 14:37:34	0.744461	2.94e-05	-1.43918	0.00351	0.871205	0.000519	1.02529	0.000607	2.01905e-08	3.67e-08	2.52946e-07	1.6e-09	0.00134398	1.02e-05	0.0411634	0.000444	11.8738	0.139	0.00866499	4.03e-05	0.282703	2.48e-05	1.46666	4.84e-05	1.88701	8.77e-05	2.46034	0.00886	0.0231938	0.000329	0.0234923	0.000257	0.00181248	1.67e-05	8.30831e-06	2.7e-05	-0.000980534	0	-0.00316122	0	-0.00428787	3.17e-12	-0.00605259	2.69e-11	-0.00305117	7.13e-12	-0.0049216	3.34e-11
QM1.1-017_3604	2019-06-03 14:38:51	0.744349	2.65e-05	-1.42584	0.00317	0.869582	0.000157	1.02716	0.000186	2.33582e-07	1.83e-08	7.61456e-07	1.13e-08	0.00120262	1.53e-05	0.0394443	0.000362	11.6922	0.114	0.00850109	1.3e-05	0.282571	1.68e-05	1.4664	6.74e-05	1.88704	6.42e-05	12.5821	0.174	0.118874	0.00295	0.115545	0.00329	0.0276428	0.000165	0.0010445	8.43e-05	-0.00097642	2.75e-12	-0.0031953	1.73e-11	-0.00431328	8.99e-12	-0.00605814	1.87e-11	-0.00307334	1.64e-11	-0.00490543	0
QM1.2-001_3662	2019-06-03 15:39:52	0.744348	2.57e-05	-1.42568	0.00306	0.869993	0.000299	1.02671	0.000353	2.01281e-07	2.69e-08	1.96141e-07	9.02e-10	0.00136396	5.08e-06	0.0451083	0.000127	13.1862	0.0549	0.00861371	2.49e-05	0.282661	1.99e-05	1.46661	4.45e-05	1.88689	7.06e-05	3.73328	0.0277	0.0374802	0.000174	0.0351607	0.000123	0.002144	1.52e-05	0.000210106	2.98e-05	-0.00103002	6.15e-12	-0.00324014	0	-0.00434396	0	-0.00611904	0	-0.00312736	1.43e-11	-0.00496863	3.4e-11
QM1.2-002_3663	2019-06-03 15:40:52	0.744339	1.95e-05	-1.42463	0.00233	0.869953	0.000213	1.02671	0.000253	5.16184e-08	1.87e-08	2.17781e-07	1.11e-09	0.00164112	2.83e-06	0.0515134	0.000194	15.1046	0.0728	0.00860506	2.43e-05	0.282693	1.6e-05	1.46659	3.72e-05	1.8869	6e-05	4.65329	0.0233	0.0548257	0.000244	0.053699	0.000205	0.0029582	2.59e-05	6.99547e-05	2.61e-05	-0.00104517	6.18e-12	-0.00325689	0	-0.00435955	6.83e-12	-0.00610905	2.46e-11	-0.0031378	0	-0.00497701	0
QM1.2-003_3666	2019-06-03 15:42:02	0.744386	2.44e-05	-1.43025	0.00291	0.870119	0.00025	1.02648	0.000292	5.62201e-08	2.52e-08	2.46146e-07	2.35e-09	0.00163116	2.3e-06	0.0549013	0.000174	16.2829	0.0755	0.00852922	2.86e-05	0.282587	1.91e-05	1.46654	4.14e-05	1.88708	7.13e-05	3.79734	0.0115	0.0475602	0.000296	0.0437033	0.000191	0.00275624	3.5e-05	6.17599e-05	2.88e-05	-0.00104044	0	-0.00321145	7.34e-12	-0.00434464	0	-0.00608623	2.62e-11	-0.00312615	0	-0.00495065	0
QM1.2-005_3667	2019-06-03 15:43:10	0.744375	3.17e-05	-1.42895	0.00378	0.869992	0.000537	1.02656	0.000634	9.02843e-08	3.88e-08	2.93852e-07	7.57e-09	0.00148901	8.8e-06	0.0432273	0.000346	12.8275	0.127	0.00854277	4.76e-05	0.282696	3.22e-05	1.46678	6.59e-05	1.88697	9.81e-05	2.80278	0.0173	0.0278696	0.000375	0.0295023	0.000314	0.00249508	7.57e-05	6.62298e-05	3.18e-05	-0.00104809	0	-0.00323035	1.27e-11	-0.00434549	0	-0.0060967	0	-0.00313416	1.89e-11	-0.00497774	2.61e-11
QM1.2-006_3669	2019-06-03 15:46:31	0.744264	2.69e-05	-1.41572	0.00321	0.869537	0.000327	1.02726	0.000386	2.44282e-06	1.67e-07	2.59792e-07	1.57e-09	0.0019573	2.64e-05	0.0621733	0.000956	17.9441	0.287	0.00855485	3.87e-05	0.28266	2.46e-05	1.46662	4.82e-05	1.88703	8.67e-05	2.61574	0.0229	0.0348551	0.000228	0.0343827	0.000165	0.00198744	2.73e-05	0.00161727	0.000106	-0.00101556	5.29e-12	-0.00324711	0	-0.00435355	0	-0.00610241	0	-0.00312814	8.94e-12	-0.00498384	0
QM1.2-007_3668	2019-06-03 15:44:12	0.744289	4.1e-05	-1.4187	0.00489	0.870286	0.000272	1.02635	0.000321	1.20045e-06	5.04e-08	3.95051e-07	3.94e-09	0.00292431	5.33e-05	0.0947373	0.00145	28.1408	0.464	0.00842015	5.3e-05	0.282686	3.2e-05	1.46655	6.95e-05	1.88668	0.000116	3.076	0.00416	0.0644651	0.000926	0.0619313	0.00105	0.00346278	3.39e-05	0.00111092	4.68e-05	-0.00104243	3.18e-12	-0.00324228	7.32e-12	-0.00435703	0	-0.00610371	0	-0.00314966	6.49e-12	-0.0049733	3.94e-11
QM1.2-011_3670	2019-06-03 15:48:00	0.744323	2.43e-05	-1.42272	0.0029	0.869517	0.000295	1.02723	0.000346	-5.5648e-09	2.13e-08	2.5342e-07	1.72e-09	0.00126547	2.76e-06	0.0427315	7.4e-05	12.5922	0.043	0.00854499	2.38e-05	0.282669	1.86e-05	1.46664	4.2e-05	1.88706	7.26e-05	4.04909	0.0141	0.0390053	0.000163	0.036229	8.61e-05	0.00299557	2.98e-05	-1.11226e-05	2.58e-05	-0.00102888	0	-0.00323603	0	-0.00434986	0	-0.00608798	0	-0.00312363	3.14e-12	-0.00497571	0
SAFT8B-001_3554	2019-06-03 13:52:10	0.744935	4.37e-05	-1.49576	0.00521	0.869083	0.00169	1.02758	0.00205	2.06233e-06	7.15e-08	4.07169e-09	1.71e-09	0.0011328	7.99e-06	0.0229745	0.000188	6.95415	0.0813	0.00854839	7.07e-05	0.282409	4.68e-05	1.46642	8.39e-05	1.88684	0.000147	1.57614	0.0127	0.00838929	0.000136	0.0125642	0.000188	2.46683e-05	7.81e-06	0.000981082	3.17e-05	-0.00101223	3.7e-12	-0.00324831	0	-0.00433994	2.53e-11	-0.00607945	2.83e-11	-0.00312284	5.38e-12	-0.00494319	1.98e-11
SAFT8B-002_3555	2019-06-03 13:53:34	0.744869	5.23e-05	-1.48788	0.00624	0.870082	0.000867	1.02667	0.00103	8.70859e-08	7.29e-08	2.45e-08	1.89e-09	0.00204477	4.66e-06	0.0541542	9.37e-05	16.5065	0.231	0.00843015	0.000104	0.282375	5.47e-05	1.46654	7.66e-05	1.88683	0.000163	1.3979	0.00356	0.0169636	5.29e-05	0.0200684	2.54e-05	9.76913e-05	7.6e-06	3.65547e-05	3.08e-05	-0.00101307	0	-0.00321697	0	-0.00434659	0	-0.00608691	0	-0.00311358	0	-0.00493087	0
SAFT8B-004_3556	2019-06-03 13:54:36	0.744887	5.26e-05	-1.48996	0.00627	0.869513	0.000886	1.02717	0.00105	7.45654e-08	7.26e-08	2.92245e-08	2.29e-09	0.00236511	4.88e-06	0.0635578	5.61e-05	18.9535	0.226	0.00847116	0.000112	0.282477	6.04e-05	1.46651	8.39e-05	1.88635	0.000167	1.33057	0.00616	0.0190357	9.25e-05	0.0220965	5.88e-05	0.000109988	8.68e-06	3.16709e-05	2.96e-05	-0.00101104	0	-0.00323199	2.69e-11	-0.00434127	3.12e-11	-0.00608895	1.38e-11	-0.00312456	2.38e-11	-0.0049373	3.32e-11
SAFT8B-005_3557	2019-06-03 13:55:39	0.744792	5.54e-05	-1.47863	0.00661	0.868141	0.000794	1.02897	0.000939	8.2708e-08	7.62e-08	3.82341e-08	2.09e-09	0.00220226	1.32e-05	0.0585544	0.00024	17.4735	0.209	0.00853583	8.53e-05	0.282546	5.4e-05	1.4668	7.85e-05	1.88697	0.000173	1.30909	0.00761	0.0172592	3.82e-05	0.0201418	4.01e-05	0.000144842	8.18e-06	3.21761e-05	2.97e-05	-0.000977448	0	-0.00319983	0	-0.00431966	9.17e-12	-0.00606947	4.15e-11	-0.00310074	1.81e-11	-0.00494293	1.87e-11
SAFT8B-006_3558	2019-06-03 13:57:40	0.744815	4.36e-05	-1.48148	0.0052	0.869478	0.000697	1.02735	0.000821	-3.73407e-08	6.2e-08	2.60743e-08	1.82e-09	0.00236057	1.05e-05	0.0614114	0.000468	18.2611	0.209	0.00851702	7.42e-05	0.282441	4.6e-05	1.46659	7.38e-05	1.88689	0.000151	1.57122	0.00438	0.0218667	0.000225	0.0261536	0.000187	0.000119296	8.31e-06	-1.86734e-05	2.92e-05	-0.00101566	0	-0.00322847	1.13e-11	-0.00433452	0	-0.00607462	1.64e-11	-0.00311689	0	-0.00491225	2.92e-11
SAFT8B-007_3561	2019-06-03 13:58:42	0.744703	6.72e-05	-1.468	0.00802	0.869355	0.000476	1.02741	0.000557	1.56227e-07	1.03e-07	7.46322e-08	2.6e-09	0.00378729	1.55e-05	0.109377	0.000733	33.2395	0.497	0.00837349	0.000108	0.282459	6.89e-05	1.46661	9.88e-05	1.88714	0.000197	1.11331	0.00535	0.0276637	0.000314	0.0297488	0.000258	0.000242399	8.74e-06	5.52751e-05	3.42e-05	-0.00098829	0	-0.0032337	2.23e-11	-0.00433664	1.85e-11	-0.00606699	0	-0.00310955	0	-0.00493312	0
SAFT8B-009_3562	2019-06-03 13:59:37	0.744797	6.57e-05	-1.47927	0.00784	0.870098	0.00084	1.02665	0.000999	-2.24774e-07	8.43e-08	4.38787e-08	2.26e-09	0.00196968	4.35e-06	0.0571186	9.83e-05	16.9666	0.214	0.00856823	0.000102	0.282422	5.94e-05	1.46649	9.69e-05	1.88702	0.000225	1.22709	0.0062	0.0158832	9.3e-05	0.0170219	5.36e-05	0.000154811	8e-06	-7.09589e-05	3.1e-05	-0.000993827	0	-0.00322059	0	-0.00431586	2.74e-11	-0.00605339	4.25e-11	-0.00311234	0	-0.00492891	9.19e-12
SAFT8B-010_3563	2019-06-03 14:00:33	0.744804	5.09e-05	-1.48006	0.00607	0.869437	0.000417	1.02732	0.00049	3.30395e-08	8.59e-08	8.79323e-08	2.16e-09	0.0036894	3.1e-06	0.10636	0.000156	32.3919	0.37	0.00838761	9.18e-05	0.282594	5.13e-05	1.46668	8.57e-05	1.88692	0.000163	1.32654	0.00698	0.0318536	0.000211	0.0344398	0.000159	0.000341942	8.45e-06	2.43812e-05	3.35e-05	-0.000998219	4.66e-13	-0.00319786	0	-0.00431523	0	-0.00604169	3.07e-11	-0.00313087	1.51e-11	-0.0049504	2.97e-11
SAFT8B-011_3564	2019-06-03 14:01:13	0.744738	5.62e-05	-1.47215	0.00671	0.86914	0.000414	1.02761	0.000494	1.53448e-07	7.88e-08	7.50443e-08	2.17e-09	0.00385954	1.02e-05	0.11252	0.000609	34.7839	0.431	0.00819747	8.52e-05	0.282486	5.54e-05	1.46661	8.12e-05	1.88693	0.000174	1.30299	0.0058	0.0333393	0.000324	0.035499	0.000248	0.00028641	8.69e-06	6.02805e-05	3.09e-05	-0.00100742	6.76e-12	-0.00323095	1.77e-11	-0.00434816	2.22e-11	-0.00607367	2.06e-11	-0.0031085	0	-0.00493292	0
SAFT8B-012_3565	2019-06-03 14:02:03	0.744722	4.65e-05	-1.4703	0.00555	0.87173	0.00177	1.02517	0.00206	8.89734e-08	6.2e-08	2.09305e-08	1.8e-09	0.000768118	3.6e-06	0.0216689	6.04e-05	6.29211	0.0593	0.00868432	6.95e-05	0.282372	4.43e-05	1.46673	7.52e-05	1.8874	0.000154	1.57352	0.00673	0.00769353	1.76e-05	0.00845241	1.56e-05	9.20981e-05	8.21e-06	3.77749e-05	2.96e-05	-0.00101502	4.18e-12	-0.00323348	1.21e-11	-0.00431793	1.54e-11	-0.00608397	0	-0.00313257	0	-0.00494049	2.99e-11
SAFT8B-016_3570	2019-06-03 14:07:28	0.744982	8.52e-05	-1.50266	0.0101	0.868311	0.000658	1.02859	0.00079	6.83261e-06	1.78e-07	2.53466e-07	6.64e-09	0.00460894	9.65e-06	0.127373	0.000581	40.6603	0.831	0.0081977	0.000157	0.282662	9.3e-05	1.4666	0.000135	1.8862	0.000275	0.75793	0.004	0.0218307	0.000207	0.0242624	0.000136	0.000558341	1.64e-05	0.00152408	4.54e-05	-0.00100318	0	-0.00324441	0	-0.00432392	0	-0.00607563	0	-0.00313491	0	-0.00495555	0
SAFT8B-023_3571	2019-06-03 14:08:47	0.744774	5.42e-05	-1.47649	0.00647	0.868935	0.000484	1.02792	0.000569	3.01263e-08	8.17e-08	9.2238e-08	2.14e-09	0.00331779	7.06e-06	0.0973775	6.96e-05	29.3577	0.333	0.00847605	9.23e-05	0.282672	5.1e-05	1.46649	8.62e-05	1.88671	0.000169	1.29399	0.00616	0.028502	0.000137	0.0301667	9.39e-05	0.000346326	8e-06	1.91895e-05	3.16e-05	-0.000984597	3.81e-12	-0.00322154	0	-0.00432503	0	-0.00607055	4.81e-11	-0.00313066	1.72e-11	-0.00495737	0
SAFT8B-024_3572	2019-06-03 14:09:45	0.744722	4.76e-05	-1.47035	0.00568	0.869991	0.000467	1.02659	0.000559	1.89189e-08	7.33e-08	6.06981e-08	2.08e-09	0.00312297	6.23e-06	0.0881313	5.02e-05	26.2301	0.286	0.00860226	8.42e-05	0.282558	5.63e-05	1.46662	9.4e-05	1.88694	0.000164	1.36075	0.00581	0.0270745	0.000122	0.0298815	7.63e-05	0.000244591	8.33e-06	-1.50298e-05	3e-05	-0.00100945	0	-0.00322297	2.08e-11	-0.00432359	0	-0.00607728	0	-0.00312277	0	-0.00494797	2.42e-11
SAFT8B-032_3568	2019-06-03 14:03:08	0.744725	5.94e-05	-1.47069	0.00709	0.869461	0.000233	1.02732	0.000275	7.55096e-07	9.56e-08	2.42223e-07	2.28e-09	0.00716501	2.15e-05	0.22764	0.000993	73.5011	1.22	0.00814858	0.000117	0.282927	6.87e-05	1.46665	9.31e-05	1.88729	0.000182	1.14783	0.00791	0.0593327	0.000654	0.0579529	0.000547	0.000810244	1.01e-05	0.000260128	3.28e-05	-0.00100921	0	-0.00321074	2.01e-11	-0.00431978	0	-0.00604585	2.06e-11	-0.00312666	1.27e-11	-0.0049757	1.16e-11
SAFT8B-033_3569	2019-06-03 14:04:04	0.744946	5.82e-05	-1.49702	0.00694	0.868388	0.000702	1.02827	0.00083	-2.15544e-07	8.33e-08	7.8565e-08	2.22e-09	0.00280293	2.97e-06	0.0765555	7.82e-05	23.7182	0.347	0.00849094	0.000107	0.282459	6.25e-05	1.46648	0.000102	1.88644	0.000184	1.20275	0.0072	0.020879	0.000145	0.0236955	0.00012	0.000275456	7.83e-06	-7.76264e-05	3e-05	-0.000993862	0	-0.00321978	0	-0.00431966	0	-0.00605687	3.92e-11	-0.00312343	2.15e-11	-0.00494478	0
SHCR1.1-005_3610	2019-06-03 14:44:58	0.744485	3.97e-05	-1.44207	0.00474	0.873305	0.00111	1.02279	0.00129	-5.06541e-08	5.68e-08	7.83635e-08	1.59e-09	0.000962859	4.26e-06	0.0285728	0.00016	8.38252	0.0788	0.00865658	6.14e-05	0.282691	3.83e-05	1.46662	6.67e-05	1.88663	0.000121	1.63637	0.0103	0.0104302	0.000109	0.0108509	7.73e-05	0.000360205	7.34e-06	-2.1034e-05	2.67e-05	-0.000988413	0	-0.00318663	0	-0.00427932	2.44e-11	-0.00602918	0	-0.0030657	2.13e-11	-0.004909	1.9e-11
SHCR1.1-006_3611	2019-06-03 14:46:18	0.744396	2.33e-05	-1.43145	0.00278	0.870178	0.000199	1.02647	0.000234	1.75955e-07	1.69e-08	2.45723e-07	2.55e-09	0.00145021	1.02e-06	0.052382	5.22e-05	15.404	0.039	0.0085734	2.03e-05	0.282647	1.65e-05	1.46651	5.08e-05	1.88697	5.91e-05	5.28729	0.0131	0.0627096	0.000193	0.0539676	0.000109	0.00383012	4.5e-05	0.000281791	2.65e-05	-0.000979905	5.3e-12	-0.00318879	8.59e-12	-0.00427649	0	-0.00604568	2.7e-11	-0.00307131	0	-0.004908	0
SHCR1.1-009_3614	2019-06-03 15:06:06	0.744318	1.57e-05	-1.42215	0.00187	0.870209	0.000163	1.02644	0.000192	5.26604e-08	1.47e-08	1.60061e-07	7.37e-10	0.00145513	5.95e-06	0.0516842	0.000132	15.0663	0.0495	0.00860611	1.72e-05	0.282713	1.31e-05	1.46666	3.39e-05	1.88708	4.52e-05	5.00683	0.019	0.0590203	0.000144	0.0513359	0.000124	0.0023348	1.8e-05	7.95244e-05	2.17e-05	-0.000971035	3.97e-12	-0.00318409	2.02e-11	-0.00428865	0	-0.00603919	0	-0.00308211	0	-0.00492971	2.51e-11
SHCR1.1-019_3615	2019-06-03 15:08:49	0.744409	2.65e-05	-1.43298	0.00317	0.870588	0.000225	1.02593	0.000266	1.13104e-07	1.48e-08	3.62365e-07	7.39e-09	0.00112025	1.05e-05	0.0389428	0.000472	11.3599	0.14	0.00862777	1.62e-05	0.282655	1.62e-05	1.46654	6.09e-05	1.88694	6.18e-05	6.21109	0.0216	0.0552964	0.000816	0.0493949	0.000588	0.00668395	0.000151	0.000221643	2.74e-05	-0.000976258	0	-0.0031823	1.98e-11	-0.00428188	0	-0.00605822	0	-0.00308083	1.35e-11	-0.00491501	0
SHCR1.1-022_3616	2019-06-03 15:09:52	0.744436	2.03e-05	-1.43618	0.00242	0.870855	0.000774	1.02587	0.000913	4.37604e-08	2.28e-08	1.87752e-08	5.9e-10	0.000671947	5.85e-06	0.0172526	9.12e-05	4.99692	0.0288	0.00861935	2.46e-05	0.282916	1.76e-05	1.46657	3.97e-05	1.88689	6.21e-05	3.54805	0.0321	0.0135075	7.06e-05	0.015839	7.1e-05	0.000187774	5.74e-06	4.78512e-05	2.22e-05	-0.000985501	0	-0.00318197	0	-0.00428721	0	-0.00604475	0	-0.0030648	7.94e-12	-0.00492682	3.02e-11
SHCR1.2-003_3656	2019-06-03 15:35:07	0.74426	2.86e-05	-1.41515	0.00342	0.871245	0.000546	1.02518	0.000647	-5.7336e-08	4.12e-08	1.30548e-07	1.35e-09	0.00145127	9.13e-06	0.042162	0.00029	12.3793	0.108	0.00864893	4.57e-05	0.282727	2.84e-05	1.46663	5.63e-05	1.88713	9.29e-05	2.28808	0.00797	0.0219644	0.000203	0.0235131	0.000198	0.000867282	1.09e-05	-4.37112e-05	2.79e-05	-0.00104613	4.5e-12	-0.00321569	0	-0.00433026	0	-0.00609652	0	-0.00313926	2.11e-11	-0.0049803	0
SHCR1.2-004_3655	2019-06-03 15:33:50	0.744286	2.27e-05	-1.41835	0.00271	0.870416	0.000394	1.02625	0.000465	-7.80588e-09	1.78e-08	1.22362e-07	7.3e-10	0.000665133	1.99e-06	0.0231241	3.11e-05	6.74006	0.0175	0.00862596	1.76e-05	0.28262	1.72e-05	1.46669	5.13e-05	1.8869	6.16e-05	5.49386	0.0132	0.0286916	4.87e-05	0.0256843	5.44e-05	0.00195438	1.13e-05	-1.22696e-05	2.93e-05	-0.00106041	0	-0.00324202	5.96e-12	-0.00434327	3.52e-11	-0.00611325	0	-0.00314141	1.39e-11	-0.00497557	0
SHCR1.2-008_3657	2019-06-03 15:36:41	0.744348	1.93e-05	-1.42565	0.00231	0.870592	0.000356	1.02598	0.000422	3.64896e-09	1.62e-08	1.03049e-07	8.54e-10	0.000739826	5.8e-07	0.0263115	0.000107	7.71813	0.0396	0.00863925	1.89e-05	0.28265	1.42e-05	1.46656	3.88e-05	1.88687	5.43e-05	5.27344	0.00879	0.0315489	0.000113	0.0278217	7.2e-05	0.00158558	1.23e-05	1.04343e-05	2.6e-05	-0.00102496	1.85e-12	-0.00324754	0	-0.00432794	0	-0.00610371	3.5e-11	-0.00314663	9.46e-12	-0.00495151	2.58e-11
SHCR1.2-009_3660	2019-06-03 15:37:45	0.744316	2.64e-05	-1.42189	0.00316	0.869795	0.000433	1.0269	0.000508	-2.10122e-08	2.68e-08	1.12763e-07	1.06e-09	0.00112088	1.04e-05	0.0383369	0.000372	11.129	0.112	0.00859486	2.83e-05	0.282568	2.03e-05	1.46664	4.2e-05	1.88673	7.85e-05	3.66927	0.0155	0.0309135	0.000224	0.0281909	0.000177	0.00121671	1.16e-05	-3.22154e-05	2.89e-05	-0.00103173	0	-0.00325001	0	-0.00433765	1.99e-11	-0.00609379	0	-0.00314679	2.24e-11	-0.00496498	2.37e-11
SHCR1.2-010_3661	2019-06-03 15:38:38	0.744278	2.42e-05	-1.41739	0.00289	0.870337	0.000221	1.02623	0.000258	3.79057e-07	2.47e-08	4.00765e-07	1.23e-09	0.00198029	1.15e-05	0.0677677	0.00037	20.1793	0.131	0.00848109	2.74e-05	0.282691	1.82e-05	1.4666	3.71e-05	1.88686	7.62e-05	3.63241	0.0219	0.0539981	0.000254	0.0488488	0.000182	0.0042562	2.31e-05	0.000428517	2.71e-05	-0.00104836	0	-0.00322306	0	-0.00435024	1.44e-11	-0.00610356	2.49e-11	-0.00315497	0	-0.00498885	1.28e-11
WMG1.1-001_3607	2019-06-03 14:40:39	0.744462	2.16e-05	-1.43936	0.00258	0.870596	0.000276	1.02596	0.000327	2.772e-07	2.42e-08	7.06536e-07	2.37e-09	0.00151443	4.08e-06	0.0493763	0.000259	14.4599	0.091	0.00857727	2.66e-05	0.282691	1.79e-05	1.46649	3.64e-05	1.88677	6.34e-05	4.08643	0.0265	0.046033	0.000537	0.0437595	0.000399	0.00839569	7.54e-05	0.000331734	2.83e-05	-0.00100743	0	-0.0031752	1.23e-11	-0.0042864	0	-0.00604825	0	-0.00307549	8.53e-12	-0.00493418	0
WMG1.1-002_3608	2019-06-03 14:42:07	0.744426	3.65e-05	-1.43495	0.00436	0.872632	0.00121	1.02379	0.00143	1.28381e-07	4.59e-08	1.87302e-07	3.63e-09	0.000710129	1.46e-06	0.0202643	7.58e-05	5.9486	0.0425	0.00863405	5.01e-05	0.282668	3.21e-05	1.46666	5.48e-05	1.88684	0.000108	2.19686	0.0245	0.0100883	0.000142	0.0108973	0.00014	0.00125846	3.46e-05	9.62775e-05	3.01e-05	-0.001	3.77e-12	-0.00317544	2.31e-11	-0.00429072	2.64e-11	-0.00604279	0	-0.00307669	0	-0.0049127	3.16e-11
WMG1.1-005_3609	2019-06-03 14:43:30	0.744384	3.82e-05	-1.43005	0.00456	0.869851	0.000257	1.02685	0.000304	1.53951e-07	3.95e-08	4.38843e-07	4.66e-09	0.00293992	8.81e-06	0.0969897	0.000875	28.6328	0.324	0.00852998	5.24e-05	0.282764	2.96e-05	1.46645	6.42e-05	1.88681	0.000117	3.94479	0.00683	0.0861798	0.000898	0.0817834	0.000309	0.00501985	5.94e-05	0.00019367	4.6e-05	-0.000970199	0	-0.00318156	0	-0.00428337	1.88e-11	-0.00605629	0	-0.00306904	0	-0.0049257	0
WMG1.2-001_3646	2019-06-03 15:24:45	0.744399	2.35e-05	-1.43175	0.00281	0.870612	0.000532	1.02583	0.000636	4.39817e-08	2.57e-08	1.79357e-07	2.07e-09	0.000846945	3.48e-06	0.0271027	0.000179	7.96413	0.0606	0.00867152	2.77e-05	0.282678	2.08e-05	1.4666	3.56e-05	1.88699	7.14e-05	3.54556	0.0146	0.0218276	0.00023	0.0212066	0.000169	0.00185942	2.81e-05	5.65334e-05	2.71e-05	-0.00105008	0	-0.0032204	7.17e-12	-0.00434693	0	-0.00610434	1.34e-11	-0.00315032	0	-0.00497255	0
WMG1.2-002_3647	2019-06-03 15:25:38	0.744418	2.43e-05	-1.4341	0.0029	0.86924	0.000497	1.02745	0.000584	3.87161e-08	2.83e-08	1.64485e-07	1.27e-09	0.000964546	3.85e-06	0.0320253	0.000265	9.31497	0.0816	0.00858329	3.12e-05	0.282704	2.16e-05	1.46652	4.42e-05	1.887	7.79e-05	3.17878	0.00589	0.0229009	0.000153	0.0215715	5.62e-05	0.00152943	1e-05	3.39503e-05	2.73e-05	-0.00103041	7.49e-12	-0.00323792	6.88e-12	-0.0043353	0	-0.00608619	0	-0.00314851	8.8e-12	-0.00498843	3.59e-11
WMG1.2-007_3649	2019-06-03 15:28:25	0.744291	2.7e-05	-1.41892	0.00322	0.870589	0.000478	1.02599	0.00056	5.79094e-08	2.33e-08	2.09745e-07	7.76e-10	0.000805988	2.27e-06	0.0272734	4.08e-05	7.95752	0.0308	0.008642	2.75e-05	0.282648	1.87e-05	1.4666	3.99e-05	1.88709	8.28e-05	3.83976	0.0135	0.0239722	7.18e-05	0.0218115	4.4e-05	0.00235937	1.32e-05	5.99757e-05	2.72e-05	-0.00102193	0	-0.00324525	1.36e-11	-0.00432868	3.5e-11	-0.0060883	0	-0.00315049	2.07e-11	-0.00496264	3.7e-11
WMG1.2-009_3648	2019-06-03 15:26:41	0.744412	2.24e-05	-1.43336	0.00267	0.869919	8.66e-05	1.02676	0.000102	1.88667e-07	1.5e-08	1.74617e-06	1.19e-08	0.00269128	1.95e-05	0.0951491	0.000284	28.4809	0.102	0.00838919	2.06e-05	0.282735	1.7e-05	1.46663	5.15e-05	1.88688	5.83e-05	8.17821	0.0214	0.175543	0.000745	0.156807	0.0014	0.0414092	0.000275	0.000455948	3.64e-05	-0.00105561	7.03e-12	-0.0032575	0	-0.00436203	3.14e-11	-0.00610403	3.8e-11	-0.00313675	2.49e-11	-0.00500271	0
WMG1.2-009_3650	2019-06-03 15:30:01	0.744422	2.17e-05	-1.43454	0.0026	0.870142	6.71e-05	1.0265	7.92e-05	5.43972e-07	2.67e-08	2.6386e-06	2.72e-08	0.00749867	0.000105	0.236214	0.00263	73.8566	0.936	0.00809203	3.45e-05	0.282823	2.06e-05	1.46667	3.98e-05	1.88677	6.82e-05	3.82851	0.0289	0.198185	0.000934	0.194444	0.00148	0.0298662	0.000444	0.000613742	2.99e-05	-0.00104218	0	-0.00324748	0	-0.00433767	2.22e-11	-0.00609731	3.03e-11	-0.00316182	5.88e-12	-0.00496246	0
WMG1.2-018_3653	2019-06-03 15:30:54	0.744291	2.06e-05	-1.41886	0.00246	0.869841	0.000295	1.02685	0.00035	-1.13349e-08	1.47e-08	2.6068e-07	8.6e-10	0.0008464	6.19e-07	0.0305014	9.37e-05	8.93772	0.0314	0.00859725	1.58e-05	0.282681	1.41e-05	1.46663	4.25e-05	1.88693	5.61e-05	6.02997	0.0129	0.0416927	0.000205	0.0358523	9.61e-05	0.00459188	2.24e-05	-2.3027e-05	2.67e-05	-0.00101453	0	-0.00322936	0	-0.00434392	0	-0.00609392	2.61e-11	-0.00314485	0	-0.0049584	1.3e-12
WMG1.2-026_3654	2019-06-03 15:32:36	0.744262	2.02e-05	-1.41545	0.00241	0.869733	0.000302	1.02689	0.000354	2.00061e-08	1.88e-08	1.50488e-07	8.52e-10	0.000990397	1.04e-06	0.0370221	0.000109	10.7887	0.0441	0.0085961	2.17e-05	0.282655	1.63e-05	1.4665	3.62e-05	1.88703	5.62e-05	4.57549	0.0182	0.0381417	0.000241	0.0320081	0.000142	0.00201673	1.76e-05	1.28681e-05	2.55e-05	-0.00103504	0	-0.00323532	0	-0.00434425	2.25e-11	-0.00610529	0	-0.00313993	0	-0.00496712	0
[truncated: 12 more columns]

## Sheet: session3
name	timestamp			179Hf/177Hf - Measured' mean	179Hf/177Hf - Measured' SE	Beta 179Hf/177Hf' mean	Beta 179Hf/177Hf' SE	171Yb/173Yb - Measured' mean	171Yb/173Yb - Measured' SE	Beta 171Yb/173Yb' mean	Beta 171Yb/173Yb' SE	180W/180Hf' mean	180W/180Hf' SE	180Ta/180Hf' mean	180Ta/180Hf' SE	176Lu/177Hf' mean	176Lu/177Hf' SE	176Yb/177Hf' mean	176Yb/177Hf' SE	174Yb/174Hf' mean	174Yb/174Hf' SE	174Hf/177Hf Corrected' mean	174Hf/177Hf Corrected' SE	176Hf/177Hf Corrected' mean	176Hf/177Hf Corrected' SE	178Hf/177Hf Corrected' mean	178Hf/177Hf Corrected' SE	180Hf/177Hf Corrected' mean	180Hf/177Hf Corrected' SE	Total Hf ion beam (V)' mean	Total Hf ion beam (V)' SE	Yb173 ion beam (V)' mean	Yb173 ion beam (V)' SE	Total Lu ion beam (V)' mean	Total Lu ion beam (V)' SE	Total Ta ion beam (V)' mean	Total Ta ion beam (V)' SE	Total W ion beam (V)' mean	Total W ion beam (V)' SE	Baseline 171Yb' mean	Baseline 171Yb' SE	Baseline 172Yb' mean	Baseline 172Yb' SE	Baseline 173Yb' mean	Baseline 173Yb' SE	Baseline 174Yb' mean	Baseline 174Yb' SE	Baseline 175Lu' mean	Baseline 175Lu' SE
BFB1.2_1_TRA-40	2021-02-10	02:38:32	PM	0.743236	2.44e-05	-1.29287	0.00292	0.870959	0.000111	1.02554	0.000131	-1.57073e-08	1.31e-08	9.02609e-08	4.44e-10	0.00116728	7.88e-06	0.0601434	0.000373	17.5818	0.119	0.00856371	1.67e-05	0.282505	1.46e-05	1.46704	5.47e-05	1.88666	6.08e-05	8.09226	0.048	0.106182	0.000543	0.0645798	0.000315	0.00208508	1.18e-05	-4.37746e-05	3.08e-05	-0.00165833	0	-0.00340058	0	-0.00455091	3.25e-11	-0.00657447	0	-0.00249335	1.88e-11
BFB1.2_2_TRA-41	2021-02-10	02:41:02	PM	0.74321	2.2e-05	-1.28976	0.00264	0.87134	0.000266	1.02507	0.000315	-1.87405e-08	1.22e-08	1.05628e-07	8.19e-10	0.000533058	2.41e-06	0.0257513	0.000138	7.4856	0.0439	0.00866651	1.43e-05	0.282528	1.39e-05	1.46712	5.01e-05	1.88666	5.9e-05	7.98765	0.0643	0.0474286	0.000546	0.0299855	0.000276	0.00248841	2.98e-05	-6.49736e-05	2.9e-05	-0.0016227	1.07e-11	-0.00335346	0	-0.00449504	0	-0.00655251	0	-0.00242023	0
BFB1.2_3_TRA-42	2021-02-10	02:43:15	PM	0.743105	2.92e-05	-1.27719	0.00349	0.870529	0.000131	1.02605	0.000154	3.81328e-08	1.43e-08	1.36146e-07	4.44e-10	0.0011579	6.02e-06	0.0638742	0.000422	18.5845	0.126	0.00857541	1.86e-05	0.282528	1.63e-05	1.46711	6e-05	1.88657	7.37e-05	6.9812	0.0549	0.102231	0.00142	0.0576896	0.000741	0.00277919	2.19e-05	6.60288e-05	2.97e-05	-0.00160806	3.84e-12	-0.00333158	0	-0.00451871	0	-0.00655193	1.6e-11	-0.002444	1.53e-11
BFB1.2_4_TRA-43	2021-02-10	02:45:21	PM	0.743202	2.14e-05	-1.28878	0.00256	0.871095	0.000173	1.02538	0.000204	-3.63829e-09	1.22e-08	1.30196e-07	4.15e-10	0.000701904	2.75e-07	0.0351653	3.98e-05	10.2807	0.0195	0.00860542	1.23e-05	0.282522	1.32e-05	1.4671	4.58e-05	1.88658	5.55e-05	8.65998	0.0495	0.0691206	0.000453	0.0428943	0.000238	0.00328753	2.59e-05	-1.36417e-06	3.09e-05	-0.00163537	1.11e-11	-0.00335286	0	-0.00451468	1.75e-11	-0.00655237	3.59e-11	-0.00244882	0
BFB1.2_5_TRA-44	2021-02-10	02:47:32	PM	0.743313	2.08e-05	-1.30208	0.00248	0.871156	0.000203	1.02528	0.000238	2.93513e-08	1.5e-08	1.14943e-07	5.03e-10	0.000731545	4.32e-06	0.0376027	0.00015	10.9186	0.0499	0.00861895	1.67e-05	0.282557	1.47e-05	1.46711	4.95e-05	1.88653	5.84e-05	6.46766	0.0232	0.0550188	0.000255	0.0337797	0.0002	0.00215681	1.3e-05	6.46439e-05	2.98e-05	-0.00162316	0	-0.00333292	0	-0.0045165	0	-0.00654587	0	-0.00244187	0
BFB1.2_6_TRA-49	2021-02-10	03:10:27	PM	0.74282	2.19e-05	-1.2431	0.00262	0.871117	0.00016	1.02533	0.00019	9.25505e-09	1.21e-08	2.29159e-07	4.14e-09	0.000790726	3.66e-06	0.0415481	0.000243	12.1513	0.0705	0.00859139	1.41e-05	0.282511	1.4e-05	1.46718	4.09e-05	1.88673	5.57e-05	8.29759	0.0848	0.0790315	0.00124	0.0469234	0.000695	0.00573331	0.000159	2.82147e-05	2.97e-05	-0.00157754	4.75e-12	-0.00329748	1.27e-11	-0.00448079	0	-0.00650018	0	-0.0024167	0
BFB1.2_7_TRA-50	2021-02-10	03:19:45	PM	0.742838	2.19e-05	-1.24523	0.00262	0.87157	0.00017	1.02483	0.0002	2.73894e-08	1.27e-08	1.12979e-07	7.55e-10	0.000875825	9.92e-06	0.0462951	0.000604	13.4454	0.178	0.00864815	1.53e-05	0.282552	1.36e-05	1.46715	4.18e-05	1.88654	5.33e-05	7.596	0.0686	0.0822931	0.00181	0.0483082	0.000981	0.00245076	1.38e-05	5.83031e-05	2.84e-05	-0.00158129	1.11e-11	-0.00330651	1.56e-11	-0.00445191	1.09e-11	-0.00649888	0	-0.00240616	9.87e-12
BFB1.2_8_TRA-51	2021-02-10	03:22:31	PM	0.7429	2.41e-05	-1.2527	0.00289	0.870879	0.000113	1.02563	0.000133	-7.86134e-09	1.63e-08	1.5859e-07	4.85e-10	0.00131853	2.43e-06	0.0670319	0.000124	19.4602	0.0544	0.00860335	1.66e-05	0.282533	1.4e-05	1.46715	4.68e-05	1.8868	6.35e-05	6.79916	0.0663	0.102948	0.00116	0.0632948	0.000707	0.00310875	3.49e-05	-2.09925e-05	3.24e-05	-0.00157417	1.17e-11	-0.00331517	2.61e-11	-0.00448037	0	-0.00653089	3.98e-11	-0.00240485	0
BFB1.2_9m_TRA-52	2021-02-10	03:24:56	PM	0.743058	2.18e-05	-1.27159	0.0026	0.870777	0.000193	1.02576	0.000227	1.64355e-08	1.32e-08	1.1746e-07	4.27e-10	0.000706188	6.56e-07	0.0356969	4.97e-05	10.3818	0.0225	0.00861043	1.5e-05	0.282531	1.27e-05	1.46718	4.1e-05	1.8866	6.09e-05	7.29373	0.0738	0.0588856	0.000579	0.0363179	0.000351	0.00247756	2.99e-05	3.20631e-05	2.79e-05	-0.00158123	0	-0.00330832	1.5e-11	-0.00448942	0	-0.00651558	2.23e-11	-0.00240759	0
BFB1.2_9mn_TRA-53	2021-02-10	03:28:01	PM	0.743013	2.32e-05	-1.26623	0.00278	0.870965	0.000108	1.02553	0.000127	4.70716e-09	1.46e-08	9.81089e-08	5.29e-10	0.00127609	4.28e-06	0.0681607	0.000243	20.0288	0.0824	0.0085831	1.76e-05	0.282575	1.33e-05	1.4672	4.29e-05	1.88658	6.74e-05	6.95629	0.0537	0.107783	0.000678	0.0632275	0.000361	0.00200137	1.34e-05	2.20891e-06	3.03e-05	-0.00158834	8.82e-12	-0.00331528	1.68e-11	-0.00448543	2.72e-12	-0.00651036	0	-0.00240995	4.2e-12
BFB1.2_10_TRA-56	2021-02-10	03:38:19	PM	0.743028	2.28e-05	-1.26794	0.00272	0.870917	0.000108	1.02559	0.000127	-7.39437e-09	1.28e-08	1.21148e-07	1.12e-09	0.00132445	3.02e-06	0.0682849	0.000237	20.0573	0.0806	0.00854883	1.54e-05	0.282525	1.46e-05	1.46693	4.78e-05	1.88653	6.02e-05	7.42458	0.0406	0.115226	0.000953	0.0694551	0.000435	0.00259484	1.27e-05	-1.03752e-05	2.89e-05	-0.00155941	1.04e-11	-0.00328289	2.19e-11	-0.00445553	2.43e-11	-0.00648308	4.49e-11	-0.00238099	0
BFB1.2_11_TRA-57	2021-02-10	03:40:59	PM	0.743009	3.73e-05	-1.26575	0.00446	0.871044	0.000126	1.02544	0.000148	-2.90842e-08	1.69e-08	1.68229e-07	7.74e-10	0.00127315	9.2e-06	0.0701449	0.000588	20.2431	0.166	0.00863636	2.21e-05	0.282579	2.36e-05	1.46708	8.55e-05	1.88665	8.82e-05	5.7713	0.0264	0.09248	0.00122	0.0521184	0.000617	0.00286138	1.18e-05	-6.61144e-05	2.93e-05	-0.00154423	8.76e-12	-0.00325692	0	-0.00444071	0	-0.00649031	2.86e-11	-0.00239163	0
BFB1.2_12_TRA-58	2021-02-10	03:43:31	PM	0.742874	2.56e-05	-1.24952	0.00306	0.871022	0.000103	1.02546	0.000121	5.01014e-08	1.36e-08	1.68263e-07	1.61e-09	0.00154703	1.13e-05	0.0818468	0.000542	23.9322	0.169	0.00855392	1.94e-05	0.282544	1.54e-05	1.46716	5.2e-05	1.88669	6.24e-05	7.3971	0.059	0.133071	0.000805	0.0783933	0.000458	0.00356324	2.35e-05	0.00011252	2.92e-05	-0.00157539	9.59e-12	-0.00328814	1.55e-11	-0.00445642	0	-0.0064793	4.52e-11	-0.00239753	1.93e-11
BFB1.2_13_TRA-59	2021-02-10	03:46:10	PM	0.743003	2.72e-05	-1.26495	0.00326	0.870992	0.00013	1.0255	0.000153	-2.01009e-08	1.47e-08	1.16898e-07	5.07e-10	0.00103916	3.76e-06	0.055627	0.000359	16.1283	0.103	0.00859695	1.48e-05	0.282536	1.64e-05	1.46719	6.21e-05	1.88673	6.97e-05	7.07377	0.0334	0.0890814	0.000961	0.0518973	0.000422	0.00240828	1.75e-05	-4.91196e-05	3.13e-05	-0.00155776	7.85e-12	-0.00329367	0	-0.00446236	0	-0.00649277	1.54e-11	-0.00237566	8.11e-12
BFB1.2_14_TRA-60	2021-02-10	03:48:37	PM	0.74316	2.07e-05	-1.28379	0.00248	0.871034	0.000112	1.02543	0.000133	5.16744e-08	1.59e-08	1.20096e-07	6.2e-10	0.00126907	1.22e-06	0.0690877	3.64e-05	20.3224	0.0433	0.00854151	1.71e-05	0.282543	1.25e-05	1.46724	3.4e-05	1.88641	5.59e-05	6.58004	0.0741	0.103578	0.00122	0.058384	0.000608	0.00231523	2.1e-05	0.000100772	3.16e-05	-0.00155572	7.47e-12	-0.00329145	0	-0.00444392	1.12e-11	-0.00647679	0	-0.00239851	4.07e-12
BFB1.2_15_TRA-63	2021-02-10	03:57:53	PM	0.742905	2.42e-05	-1.25327	0.0029	0.870773	0.000174	1.02576	0.000205	-2.29445e-08	1.34e-08	1.49852e-07	3.58e-10	0.000846122	2.09e-06	0.0419982	6.89e-05	12.3111	0.0303	0.00857661	1.45e-05	0.282497	1.47e-05	1.46706	5.26e-05	1.88665	6.93e-05	7.7294	0.045	0.0744297	0.000422	0.0465691	0.000165	0.00336089	2.17e-05	-5.8528e-05	3.1e-05	-0.001538	0	-0.0032773	2.24e-11	-0.00444265	2.47e-11	-0.00646835	0	-0.00234667	1.35e-11
BFB1.2_16_TRA-64	2021-02-10	04:02:05	PM	0.743028	1.86e-05	-1.26798	0.00222	0.871313	0.000142	1.02512	0.000167	-1.66534e-08	1.31e-08	1.21862e-07	7.85e-10	0.00092817	8.81e-07	0.0495362	0.00015	14.4575	0.0496	0.00858281	1.49e-05	0.282537	1.18e-05	1.46726	3.15e-05	1.88664	5.55e-05	7.5219	0.0443	0.0848492	0.000742	0.0493166	0.000325	0.00267327	3.14e-05	-2.44592e-05	2.9e-05	-0.00158081	0	-0.00329555	2.23e-11	-0.00443127	0	-0.00650124	0	-0.00239322	1.66e-11
QM1.3_1_TRA-65	2021-02-10	04:05:32	PM	0.742757	2.14e-05	-1.23556	0.00256	0.871233	7.19e-05	1.02521	8.46e-05	-2.89772e-09	1.61e-08	2.52409e-07	3.04e-09	0.00257162	2.73e-05	0.138794	0.00164	40.867	0.519	0.0085206	2.67e-05	0.282665	1.61e-05	1.46722	3.44e-05	1.88671	5.91e-05	5.98993	0.0441	0.196025	0.00318	0.112489	0.00165	0.00450297	8.39e-05	-1.13578e-05	2.89e-05	-0.00152521	0	-0.00325932	0	-0.00442748	2.56e-11	-0.0064618	5.45e-11	-0.00236705	0
QM1.3_2_TRA-66	2021-02-10	04:11:13	PM	0.742849	1.91e-05	-1.24662	0.00229	0.871105	0.000148	1.02537	0.000174	-2.58861e-08	1.65e-08	3.03583e-07	7.24e-10	0.00111955	2.95e-06	0.0578085	0.000273	16.8843	0.0913	0.00860435	1.99e-05	0.282627	1.39e-05	1.46714	3.62e-05	1.88676	5.65e-05	6.20132	0.0365	0.0824099	0.00071	0.0490594	0.000347	0.00547374	2.42e-05	-4.26156e-05	3.02e-05	-0.00153903	1.15e-12	-0.00326673	0	-0.00443768	0	-0.00648103	3e-11	-0.00237944	0
QM1.3_3_TRA-67	2021-02-10	04:13:57	PM	0.742711	3.11e-05	-1.23006	0.00372	0.871716	0.000106	1.02465	0.000124	-3.4544e-08	1.52e-08	2.73389e-07	1.92e-09	0.00180167	1.6e-05	0.0814494	0.000405	23.5861	0.135	0.00861045	2.09e-05	0.282656	1.43e-05	1.4673	4.9e-05	1.88634	6.31e-05	7.02546	0.119	0.129687	0.00237	0.086689	0.000854	0.00568231	0.000123	-5.76055e-05	2.93e-05	-0.00156486	0	-0.00326115	0	-0.00444245	0	-0.00647035	0	-0.00237779	0
QM1.3_4_TRA-70	2021-02-10	04:23:57	PM	0.742755	3.73e-05	-1.23604	0.00442	0.87138	9.72e-05	1.02504	0.000114	-4.96275e-08	1.73e-08	3.02157e-07	2.44e-09	0.00278494	0.000105	0.12451	0.00348	36.6508	1.06	0.00852022	3.94e-05	0.28261	2.41e-05	1.46735	7.44e-05	1.88646	7.25e-05	7.55833	0.112	0.190864	0.00255	0.127553	0.00265	0.00620931	0.000115	-7.46016e-05	3.4e-05	-0.00153265	0	-0.00323846	0	-0.00442226	0	-0.00648851	2.18e-11	-0.00235821	5.58e-12
QM1.3_5_TRA-71	2021-02-10	04:28:23	PM	0.742978	2.21e-05	-1.26203	0.00265	0.871336	9.36e-05	1.02509	0.00011	1.37215e-08	1.67e-08	3.41842e-07	2.31e-09	0.00165275	1.95e-06	0.0866568	0.000338	25.2696	0.124	0.00862335	2.01e-05	0.282623	1.5e-05	1.46713	4.46e-05	1.88657	5.92e-05	6.13593	0.0233	0.122562	0.000712	0.0715538	0.000313	0.00611223	5.62e-05	3.25319e-05	3.07e-05	-0.00156563	0	-0.003283	1.43e-11	-0.00444424	0	-0.00648919	4.56e-11	-0.00239541	1.3e-11
WMG1.3_1_TRA-72	2021-02-10	04:32:06	PM	0.742662	2.27e-05	-1.22426	0.00272	0.871199	0.000144	1.02526	0.000169	-3.46549e-08	2.12e-08	1.43894e-07	8.91e-10	0.00127205	5e-06	0.0692436	0.000396	20.2052	0.13	0.00856827	2.27e-05	0.282655	1.74e-05	1.46715	4.75e-05	1.88659	6.61e-05	5.16024	0.052	0.0801858	0.000487	0.0454901	0.000324	0.00214953	1.63e-05	-4.46635e-05	3.17e-05	-0.00153445	8.4e-12	-0.00323152	1.7e-11	-0.00444187	2.43e-11	-0.00646079	4.4e-11	-0.00236488	0
WMG1.3_2_TRA-73	2021-02-10	04:35:20	PM	0.742986	2.28e-05	-1.26301	0.00272	0.870875	0.000144	1.02562	0.000168	3.21657e-08	1.77e-08	2.1984e-07	9.81e-10	0.00120972	2.11e-06	0.0656282	0.000244	19.1863	0.0815	0.00857106	2.01e-05	0.28255	1.6e-05	1.46708	3.7e-05	1.88665	6.79e-05	5.34837	0.0256	0.0788156	0.000367	0.0456882	0.000177	0.00343084	2.47e-05	5.1145e-05	2.8e-05	-0.00154126	1.07e-11	-0.00325092	2.64e-11	-0.00444985	3.3e-11	-0.00648738	2.61e-11	-0.00239672	1.37e-11
WMG1.3_3_TRA-74	2021-02-10	04:38:03	PM	0.742713	2.22e-05	-1.23036	0.00266	0.870809	0.000121	1.02572	0.000143	-1.72731e-08	2e-08	1.32624e-07	5.57e-10	0.00161659	5.79e-06	0.0841703	0.000212	24.4828	0.0843	0.00859416	2.18e-05	0.282676	1.6e-05	1.46721	4.73e-05	1.88648	6.48e-05	5.18328	0.0427	0.0983229	0.000595	0.0586179	0.000298	0.0019987	1.83e-05	-2.79145e-05	2.96e-05	-0.00151071	4.33e-12	-0.00325392	0	-0.00442236	0	-0.00646405	0	-0.00236851	6e-12
WMG1.3_5_TRA-77	2021-02-10	04:49:29	PM	0.742846	2.85e-05	-1.24625	0.0034	0.871042	0.000128	1.02544	0.000151	9.10209e-09	2.11e-08	7.31739e-07	6.11e-09	0.00211128	2.65e-05	0.100114	0.00159	29.4928	0.477	0.0085301	2.67e-05	0.282662	1.9e-05	1.46717	5.17e-05	1.88662	7.23e-05	4.48915	0.076	0.109041	0.00337	0.0700835	0.00187	0.00956604	0.000195	1.44822e-05	2.7e-05	-0.00156709	8.45e-12	-0.00326785	2.28e-11	-0.00445558	2.32e-11	-0.00647135	0	-0.00240857	4.36e-12
WMG1.3_6_TRA-78	2021-02-10	04:51:59	PM	0.742966	2.02e-05	-1.26054	0.00242	0.8711	6.02e-05	1.02537	7.08e-05	-3.88123e-08	1.59e-08	1.66102e-06	7.27e-09	0.00350795	2.48e-05	0.172378	0.000857	50.9331	0.335	0.0084148	2.64e-05	0.28262	1.4e-05	1.46729	4.8e-05	1.88654	5.67e-05	5.75034	0.0343	0.221957	0.000982	0.140026	0.000741	0.0288682	0.000127	-4.8651e-05	2.8e-05	-0.00154472	6.77e-12	-0.00327038	0	-0.00443306	2.09e-11	-0.00645181	0	-0.00237829	0
WMG1.3_8_TRA-79	2021-02-10	04:56:14	PM	0.742939	2.76e-05	-1.25733	0.0033	0.871175	0.000173	1.02529	0.000204	2.32672e-08	1.82e-08	2.0928e-07	1.83e-09	0.00114925	3.97e-06	0.0559115	9.66e-05	16.305	0.0563	0.00857947	2.17e-05	0.282635	1.73e-05	1.46718	5.64e-05	1.88649	6.79e-05	5.59402	0.0406	0.0704131	0.000539	0.0441796	0.000294	0.00336776	1.25e-05	4.05395e-05	3.02e-05	-0.00155086	0	-0.00325334	0	-0.00445986	0	-0.00647562	3.9e-11	-0.00239897	8.15e-12
WMG1.3_9_TRA-80	2021-02-10	04:58:40	PM	0.742779	2.31e-05	-1.23817	0.00276	0.871468	0.000211	1.02495	0.000248	-4.36147e-08	1.92e-08	1.51978e-07	5.83e-10	0.000931205	2.61e-06	0.049366	0.000164	14.2558	0.0626	0.00865831	2.31e-05	0.282668	1.67e-05	1.46736	4.67e-05	1.88661	6.24e-05	4.90249	0.0533	0.0549096	0.000774	0.0323443	0.000443	0.00215295	2.59e-05	-5.76936e-05	2.89e-05	-0.0015295	0	-0.00322899	0	-0.00440693	1.22e-11	-0.00643928	3.88e-11	-0.00237712	0
WMG1.3_10_TRA-81	2021-02-10	05:01:12	PM	0.742893	2.33e-05	-1.25187	0.00278	0.871292	0.000133	1.02515	0.000156	1.62498e-08	2.26e-08	6.2843e-07	1.91e-09	0.00157984	1.87e-05	0.0784135	0.000875	22.9367	0.258	0.00860358	2.4e-05	0.282672	1.65e-05	1.46722	4.26e-05	1.88657	6.96e-05	4.82442	0.0556	0.086071	0.00192	0.0540551	0.00124	0.00897547	0.00013	4.0745e-05	3.31e-05	-0.00153605	6.23e-12	-0.00323262	0	-0.00441135	2.62e-11	-0.00646331	0	-0.00236291	0
WMG1.3_11_TRA-84	2021-02-10	05:09:54	PM	0.742743	2.2e-05	-1.23393	0.00264	0.871831	0.000356	1.02455	0.000418	4.11917e-08	2.21e-08	1.26863e-07	7.48e-10	0.000542272	4.19e-06	0.0284843	0.000224	8.1968	0.0694	0.00869197	1.95e-05	0.282665	1.67e-05	1.46723	4.72e-05	1.88655	6.67e-05	5.10677	0.0708	0.0314397	0.000189	0.0185117	0.000107	0.00183624	2.16e-05	6.31025e-05	3.23e-05	-0.00153375	0	-0.00324877	0	-0.0044031	1.77e-11	-0.00645017	1.72e-11	-0.00236874	1.64e-11
SHCR1.3_1_TRA-85	2021-02-10	05:16:25	PM	0.742874	2.06e-05	-1.24953	0.00247	0.87138	0.000131	1.025	0.000152	-4.04958e-08	1.43e-08	1.16751e-07	5.16e-10	0.00103899	2.41e-06	0.0546839	0.000118	15.8923	0.0451	0.00860357	1.64e-05	0.282645	1.34e-05	1.46735	4.28e-05	1.88663	5.17e-05	7.38077	0.0744	0.0897826	0.000818	0.0532306	0.000489	0.00253267	3.09e-05	-8.17043e-05	3.06e-05	-0.0015299	0	-0.00319552	0	-0.00440156	7.8e-12	-0.00642632	2.51e-11	-0.00233241	3.54e-12
SHCR1.3_2_TRA-86	2021-02-10	05:19:09	PM	0.742684	2.21e-05	-1.22689	0.00264	0.871437	0.0001	1.02496	0.000119	-1.74282e-08	1.43e-08	1.5675e-07	9.44e-10	0.00146648	4.26e-06	0.0780558	0.00022	22.5946	0.0829	0.00860666	1.73e-05	0.282672	1.46e-05	1.46715	5.49e-05	1.88661	5.4e-05	7.11883	0.0275	0.124592	0.000377	0.0734815	0.000187	0.00327975	2.39e-05	-2.38484e-05	3.04e-05	-0.00152608	9.3e-12	-0.00323772	2.23e-11	-0.00443543	0	-0.00647104	0	-0.00238116	9.33e-12
SHCR1.3_3_TRA-87	2021-02-10	05:21:45	PM	0.742709	2.31e-05	-1.22983	0.00276	0.871648	5.45e-05	1.02472	6.41e-05	1.18751e-08	1.09e-08	4.46072e-07	2.64e-09	0.00292405	2.24e-05	0.153287	0.00175	45.1895	0.548	0.00859235	2.18e-05	0.282673	1.45e-05	1.46734	5.08e-05	1.88651	5.66e-05	8.44961	0.0846	0.306772	0.0064	0.179197	0.00309	0.0112725	0.000181	2.99883e-05	2.73e-05	-0.00153397	0	-0.00324503	0	-0.00441758	0	-0.00643948	2.76e-11	-0.00236539	8.44e-12
SHCR1.3_4_TRA-88	2021-02-10	05:26:21	PM	0.742894	2.08e-05	-1.25196	0.00249	0.871663	0.000272	1.02469	0.000318	1.66499e-08	1.4e-08	4.14404e-08	3.7e-10	0.000479234	1.97e-06	0.0246055	4.24e-05	7.15929	0.0185	0.00861584	1.39e-05	0.28268	1.31e-05	1.46732	4.39e-05	1.88665	5.67e-05	7.21074	0.0312	0.0404112	0.00017	0.0248877	0.000163	0.000881869	8.5e-06	3.34993e-05	3.02e-05	-0.00153511	1.85e-12	-0.00321411	1.94e-11	-0.00440821	1.35e-11	-0.00643509	3.75e-11	-0.00236997	1.18e-11
SHCR1.3_5_TRA-91	2021-02-10	05:35:35	PM	0.742556	2.81e-05	-1.21159	0.00336	0.871607	8.21e-05	1.02477	9.65e-05	-7.34736e-09	1.24e-08	1.48378e-07	9.84e-10	0.00182346	2.4e-05	0.10087	0.00141	29.5912	0.421	0.00856516	1.83e-05	0.282685	1.74e-05	1.46726	6.25e-05	1.88663	6.73e-05	7.75353	0.0586	0.181983	0.00376	0.102343	0.00204	0.00340015	4.57e-05	-1.33374e-05	2.88e-05	-0.00154452	6.66e-12	-0.00324743	0	-0.00444335	2.64e-11	-0.00644426	3.19e-11	-0.00239743	0
SHCR1.3_6_TRA-92	2021-02-10	05:38:43	PM	0.742762	1.91e-05	-1.23618	0.00229	0.871296	0.000108	1.02514	0.000128	6.21263e-09	1.26e-08	3.10785e-07	2.64e-09	0.00141919	1.03e-05	0.0706598	0.00056	20.597	0.176	0.00859875	1.52e-05	0.282654	1.31e-05	1.46728	3.88e-05	1.88659	5.3e-05	7.61159	0.056	0.124573	0.00202	0.0775437	0.0012	0.00709055	0.000102	2.31268e-05	2.9e-05	-0.00151078	0	-0.00324242	0	-0.00442406	1.75e-12	-0.00644596	2.97e-11	-0.00238877	0
SHCR1.3_7_TRA-93	2021-02-10	05:41:04	PM	0.742608	1.96e-05	-1.21774	0.00234	0.871332	0.000142	1.0251	0.000167	-2.88581e-08	1.1e-08	1.37491e-07	4.87e-10	0.000938382	5.07e-06	0.0489654	0.000382	14.2249	0.113	0.00862966	1.36e-05	0.282666	1.33e-05	1.46731	3.78e-05	1.88676	5.04e-05	8.54229	0.0476	0.0958704	0.00124	0.0570636	0.000612	0.00341238	2.56e-05	-6.24677e-05	2.78e-05	-0.00153387	0	-0.00323547	9.83e-12	-0.00442182	0	-0.00644805	0	-0.00238393	0
SHCR1.3_8_TRA-94	2021-02-10	05:43:26	PM	0.74255	2e-05	-1.21078	0.00239	0.871754	0.000184	1.02461	0.000216	-8.38985e-09	1.14e-08	1.41242e-07	5.59e-10	0.000665055	3.75e-06	0.035027	0.000341	10.1824	0.1	0.00864345	1.36e-05	0.282628	1.16e-05	1.46728	3.67e-05	1.88675	5.58e-05	8.24624	0.0277	0.0651397	0.000731	0.0386294	0.000306	0.00340329	1.63e-05	-2.64842e-05	2.81e-05	-0.00151941	0	-0.00321187	0	-0.0044105	0	-0.00644053	0	-0.0023562	8.78e-12
SHCR1.3_9_TRA-95	2021-02-10	05:45:24	PM	0.742868	2.04e-05	-1.24886	0.00243	0.871514	0.000111	1.02489	0.00013	-3.64406e-08	1.25e-08	2.72206e-07	5.16e-10	0.00113092	1.77e-06	0.0672973	6.83e-05	19.7952	0.0422	0.00853522	1.52e-05	0.282585	1.32e-05	1.46737	4.2e-05	1.88635	5.7e-05	7.41406	0.0749	0.11305	0.00118	0.0593323	0.000685	0.0060032	6.78e-05	-7.72904e-05	2.82e-05	-0.0015193	1.35e-12	-0.00323119	0	-0.00441345	3.15e-11	-0.00641917	0	-0.00238082	0
SHCR1.3_11_TRA-98	2021-02-10	05:54:40	PM	0.742755	2.56e-05	-1.23538	0.00306	0.871585	0.000119	1.02478	0.000139	-2.65694e-09	9.64e-09	3.56386e-07	1.22e-09	0.000918354	2.04e-06	0.0483198	0.000101	14.0235	0.0362	0.00862326	1.17e-05	0.28267	1.35e-05	1.46714	4.93e-05	1.88673	5.75e-05	9.73035	0.0413	0.106102	0.000392	0.0629538	0.000252	0.0100468	6.07e-05	-3.50322e-06	2.81e-05	-0.00152887	0	-0.00325495	0	-0.00440525	0	-0.00643908	1.63e-11	-0.00238007	2.32e-12
SHCR1.3_12_TRA-99	2021-02-10	05:57:36	PM	0.742649	2.46e-05	-1.22262	0.00294	0.871776	8.18e-05	1.02457	9.61e-05	2.55889e-08	1.23e-08	2.83868e-07	1.92e-09	0.00148148	6.28e-06	0.0823968	0.000422	24.0044	0.13	0.00857814	1.6e-05	0.282617	1.37e-05	1.46722	5.73e-05	1.88647	5.94e-05	8.4776	0.0445	0.160614	0.00115	0.0891407	0.000655	0.00704173	4.36e-05	5.49265e-05	3.12e-05	-0.00153982	0	-0.00325604	1.53e-11	-0.00442353	0	-0.00643619	3.35e-11	-0.00238614	5.66e-12
SHCR1.3_13_TRA-100	2021-02-10	06:00:09	PM	0.742586	1.92e-05	-1.21513	0.0023	0.871464	4.3e-05	1.02494	5.06e-05	1.02687e-08	1.14e-08	8.19527e-07	4.64e-09	0.00333623	1.79e-05	0.179843	0.000873	53.5773	0.31	0.0084499	2.1e-05	0.28266	1.25e-05	1.46719	3.79e-05	1.88658	5.31e-05	8.4896	0.0485	0.334881	0.00144	0.197196	0.000777	0.0197986	0.000114	4.79983e-05	2.88e-05	-0.0015457	2.85e-12	-0.00325936	1.4e-11	-0.0044453	1.99e-11	-0.00643856	3.17e-11	-0.00239267	0
SHCR1.3_14_TRA-101	2021-02-10	06:02:47	PM	0.742591	1.93e-05	-1.21578	0.00231	0.871448	8.52e-05	1.02496	0.0001	3.56431e-08	1.19e-08	2.53671e-07	4.99e-10	0.00166175	3.81e-06	0.0841705	0.000103	24.6106	0.0552	0.00855045	1.45e-05	0.282662	1.26e-05	1.4673	3.77e-05	1.88666	5.37e-05	7.96845	0.0262	0.152128	0.000573	0.0925795	0.000156	0.00584602	1.71e-05	8.93399e-05	2.83e-05	-0.00150178	1.85e-12	-0.00321877	0	-0.00442441	0	-0.00644204	4.12e-11	-0.00237327	8.6e-12
SHCR1.3_15_TRA-102	2021-02-10	06:05:47	PM	0.742709	2.35e-05	-1.22989	0.00281	0.871478	8.63e-05	1.02491	0.000101	-4.58514e-08	1.44e-08	1.42688e-07	5.64e-10	0.00185751	4.86e-06	0.0960993	0.000166	28.2036	0.0829	0.0085384	2e-05	0.282652	1.58e-05	1.46731	4.92e-05	1.88644	5.85e-05	7.46862	0.0459	0.163083	0.00079	0.0986427	0.000409	0.00308981	2.82e-05	-9.35604e-05	3.23e-05	-0.00153556	6.92e-12	-0.00325144	1.46e-11	-0.00442535	0	-0.00644583	4.18e-11	-0.00238066	0
SHCR1.3_16_TRA-105	2021-02-10	06:14:31	PM	0.742453	2.18e-05	-1.19922	0.00261	0.871313	0.00015	1.02513	0.000177	-2.7006e-09	1.03e-08	1.82637e-07	1.8e-09	0.000675692	1.73e-06	0.0356378	7.9e-05	10.4275	0.0254	0.00860021	1.23e-05	0.282615	1.38e-05	1.46739	4.98e-05	1.88688	5.48e-05	9.83752	0.0615	0.0801542	0.000525	0.0472958	0.000262	0.00518958	2.39e-05	-2.54384e-07	3.01e-05	-0.00155485	7.07e-12	-0.00324615	0	-0.00445764	0	-0.00645492	0	-0.00240466	9.99e-12
SAFT8.2_1_TRA-106	2021-02-10	06:19:06	PM	0.742726	2.46e-05	-1.23188	0.00295	0.871213	8.24e-05	1.02524	9.69e-05	-2.38015e-09	2.01e-08	3.08177e-08	7.09e-10	0.00283907	2.93e-05	0.140139	0.00133	41.3968	0.432	0.00849278	2.69e-05	0.282463	1.8e-05	1.46724	3.68e-05	1.88647	6.94e-05	4.80896	0.0346	0.149843	0.000431	0.0942977	0.000337	0.000425691	8.46e-06	-7.01681e-06	2.94e-05	-0.00154959	0	-0.00325847	1.8e-12	-0.00445969	0	-0.00645664	0	-0.00243467	0
SAFT8.2_2_TRA-107	2021-02-10	06:22:02	PM	0.742502	2.78e-05	-1.20506	0.00332	0.871582	4.43e-05	1.0248	5.21e-05	2.70531e-08	2.32e-08	5.09124e-07	1.81e-08	0.00623076	1.12e-05	0.347967	0.00126	104.334	0.695	0.00830865	4.15e-05	0.282564	2.44e-05	1.4674	4.96e-05	1.88657	8.17e-05	4.54017	0.0135	0.358822	0.0022	0.200284	0.000811	0.00667023	0.000247	3.78214e-05	3.14e-05	-0.00154447	4.48e-12	-0.00327391	1.38e-11	-0.00445525	1.86e-11	-0.00646126	0	-0.00242832	0
SAFT8.2_3_TRA-108	2021-02-10	06:24:20	PM	0.742609	2.65e-05	-1.2179	0.00317	0.871363	5.87e-05	1.02506	6.9e-05	-2.69862e-08	2.15e-08	7.49573e-08	7.77e-10	0.00427157	2.72e-05	0.222844	0.000959	66.1537	0.404	0.00844974	3.26e-05	0.282581	2.01e-05	1.46733	4.05e-05	1.88676	7.08e-05	4.48061	0.0253	0.225779	0.000463	0.134316	0.000284	0.000969269	8.57e-06	-2.18351e-05	2.86e-05	-0.00155713	1.19e-11	-0.00325007	0	-0.00445614	2.49e-11	-0.00646731	2.08e-11	-0.00240999	1.34e-11
SAFT8.2_4_TRA-109	2021-02-10	06:26:33	PM	0.742633	2.88e-05	-1.22073	0.00345	0.87136	5.69e-05	1.02506	6.7e-05	5.57724e-08	2.67e-08	2.80776e-07	5.04e-09	0.00695661	1.62e-05	0.338551	0.00109	101.657	0.655	0.00831488	4.59e-05	0.282603	2.54e-05	1.46727	5.5e-05	1.88643	7.71e-05	3.70367	0.029	0.284652	0.00279	0.182684	0.00145	0.00296783	3.77e-05	7.69981e-05	2.98e-05	-0.00153955	7.65e-12	-0.00327018	0	-0.00445295	2.63e-11	-0.00644076	0	-0.00241689	0
SAFT8.2_5_TRA-112	2021-02-10	06:38:32	PM	0.742649	6.21e-05	-1.2226	0.00742	0.871648	0.00012	1.02473	0.000141	2.03658e-08	2.9e-08	5.15892e-08	1.31e-09	0.00345853	7.7e-05	0.130033	0.0009	37.5204	0.269	0.00856787	3.82e-05	0.282624	2.26e-05	1.46779	7.34e-05	1.88648	0.000105	5.37839	0.111	0.157676	0.00234	0.122534	0.00183	0.000796581	3.35e-05	1.67512e-05	4.38e-05	-0.00153363	4.21e-12	-0.00325547	0	-0.00444129	0	-0.00645257	2.62e-11	-0.00240155	1.17e-11
SAFT8.2_6_TRA-113	2021-02-10	06:41:35	PM	0.742416	2.33e-05	-1.19478	0.00279	0.871575	7.35e-05	1.02481	8.65e-05	1.0813e-08	2.1e-08	8.0771e-08	8.24e-10	0.00365093	1.52e-05	0.186301	0.00124	54.7342	0.419	0.00854604	3.14e-05	0.282585	2.02e-05	1.46738	5.16e-05	1.88675	6.97e-05	5.00663	0.0226	0.212987	0.0023	0.129563	0.00106	0.00117805	1.6e-05	1.09268e-05	3.11e-05	-0.00155024	1.09e-11	-0.00326768	0	-0.00445444	2.25e-11	-0.00645164	0	-0.00242086	0
SAFT8.2_7_TRA-114	2021-02-10	06:45:28	PM	0.742591	3.59e-05	-1.21568	0.00429	0.87141	0.00014	1.02501	0.000164	1.04011e-07	3.81e-08	9.2556e-08	1.03e-09	0.00299116	1.63e-05	0.140595	0.001	41.2138	0.329	0.00862335	3.96e-05	0.282562	2.56e-05	1.4675	5.36e-05	1.88657	9.69e-05	2.77093	0.0151	0.0885249	0.00115	0.058086	0.000479	0.000728889	9.82e-06	0.000101895	2.98e-05	-0.00150729	1.14e-11	-0.0032434	0	-0.0044476	1.87e-11	-0.0064679	0	-0.00242239	0
SAFT8.2_8_TRA-115	2021-02-10	06:48:56	PM	0.742294	3.9e-05	-1.18017	0.00467	0.871152	0.000238	1.02532	0.00028	5.43544e-08	2.97e-08	1.93835e-07	5.32e-09	0.00178041	1.19e-05	0.0831083	0.000574	24.2087	0.22	0.00858403	3.93e-05	0.282543	2.86e-05	1.46729	6.67e-05	1.88687	0.000107	4.34279	0.0377	0.080768	0.00086	0.0554863	0.000774	0.00234217	5.88e-05	7.18848e-05	3.81e-05	-0.00152134	0	-0.00325281	0	-0.00443245	0	-0.00645829	0	-0.00241757	0
SAFT10_1_TRA-116	2021-02-10	06:58:22	PM	0.742587	1.77e-05	-1.2152	0.00211	0.871449	5.38e-05	1.02496	6.33e-05	-3.08802e-09	1.38e-08	6.03183e-07	1.08e-08	0.00279462	3.38e-06	0.140857	0.000278	41.508	0.122	0.00852829	1.83e-05	0.282463	1.12e-05	1.46741	3.31e-05	1.88675	4.99e-05	7.78421	0.0686	0.249379	0.00264	0.153056	0.00117	0.0129977	0.000131	-8.01585e-06	3.21e-05	-0.00153794	6.23e-12	-0.00325383	0	-0.00444055	8.6e-12	-0.0064604	0	-0.00241894	1.68e-11
SAFT10_2_TRA-119	2021-02-10	07:08:01	PM	0.742517	1.64e-05	-1.20683	0.00196	0.871218	0.000109	1.02523	0.000128	-2.6941e-08	1.41e-08	2.0333e-07	4.86e-10	0.00123051	3.61e-06	0.0605974	4.75e-05	17.6711	0.0376	0.00861034	1.5e-05	0.282545	1.14e-05	1.46739	3.35e-05	1.88674	4.8e-05	7.76663	0.033	0.107205	0.0004	0.0674768	0.000111	0.00459731	1.55e-05	-6.93242e-05	3.21e-05	-0.00151329	6.82e-12	-0.0032515	0	-0.00444048	9.62e-12	-0.00647538	4.44e-11	-0.00242275	0
SAFT10_3_TRA-120	2021-02-10	07:10:46	PM	0.742595	1.93e-05	-1.21616	0.00231	0.871149	0.000297	1.02534	0.00035	2.55601e-08	1.17e-08	1.06048e-07	5.28e-10	0.000449722	9.78e-07	0.0209124	5.33e-05	6.09425	0.0201	0.00860771	1.34e-05	0.282512	1.26e-05	1.46745	3.94e-05	1.88658	5.4e-05	8.02922	0.0567	0.0376944	0.000344	0.0253648	0.000224	0.00249134	2.33e-05	7.69464e-05	2.76e-05	-0.00152647	1.16e-11	-0.00323745	0	-0.00444128	5.72e-12	-0.00644023	0	-0.0024044	0
SAFT10_4_TRA-121	2021-02-10	07:13:35	PM	0.742524	1.78e-05	-1.20771	0.00213	0.871545	9.22e-05	1.02483	0.000109	-2.32123e-08	1.13e-08	1.40591e-07	4.92e-10	0.00155125	1.46e-05	0.0744096	0.000791	21.6451	0.235	0.00862474	1.51e-05	0.282517	1.16e-05	1.46742	3.28e-05	1.88685	4.83e-05	8.05788	0.0477	0.138711	0.00225	0.0896547	0.00135	0.00330438	2.83e-05	-4.5142e-05	2.73e-05	-0.00153522	1.26e-11	-0.0032604	1.59e-11	-0.00443453	0	-0.00646301	3.56e-11	-0.00239965	0
SAFT10_5_TRA-122	2021-02-10	07:16:02	PM	0.742681	1.93e-05	-1.22646	0.0023	0.871391	8.23e-05	1.02503	9.68e-05	9.00963e-09	1.25e-08	1.88263e-07	3.97e-09	0.00175277	2.47e-05	0.086187	0.00092	24.9587	0.271	0.00857665	1.64e-05	0.28251	1.31e-05	1.46733	3.35e-05	1.88686	5.42e-05	7.58778	0.0285	0.14433	0.00101	0.0914256	0.000966	0.0040673	7.3e-05	3.86796e-05	2.83e-05	-0.00149438	0	-0.00322053	0	-0.00441969	1.05e-11	-0.00643692	0	-0.00236913	1.16e-11
SAFT10_6_TRA-123	2021-02-10	07:18:40	PM	0.74261	2.11e-05	-1.21795	0.00253	0.871649	0.000117	1.02471	0.000139	8.38886e-09	1.33e-08	3.25226e-07	9.37e-09	0.00127715	1.6e-05	0.0589925	0.000895	16.8757	0.253	0.00862793	1.65e-05	0.282558	1.28e-05	1.46743	4.3e-05	1.88659	5.44e-05	8.27763	0.0848	0.114592	0.00288	0.0765214	0.00166	0.00734493	0.000144	4.04262e-05	3.24e-05	-0.00152328	1.27e-11	-0.00323528	0	-0.00442846	0	-0.00644451	2.34e-11	-0.00238032	0
SAFT10_7_TRA-126	2021-02-10	07:30:43	PM	0.742476	1.77e-05	-1.20192	0.00212	0.870959	0.00017	1.02548	0.0002	2.41364e-08	9.5e-09	2.19303e-07	1.19e-09	0.000760046	2.27e-05	0.0352304	0.00104	10.365	0.309	0.00855666	1.12e-05	0.282453	1.07e-05	1.46744	3.18e-05	1.88673	4.82e-05	10.5451	0.0963	0.0780231	0.00171	0.0523768	0.00115	0.00695205	6.38e-05	6.11069e-05	2.86e-05	-0.00151993	8.89e-12	-0.00325686	0	-0.0044447	0	-0.006433	0	-0.00240369	1.63e-11
SAFT10_8_TRA-127	2021-02-10	07:33:33	PM	0.742563	1.97e-05	-1.21237	0.00236	0.871492	0.000273	1.02489	0.000319	6.0851e-08	1.54e-08	8.1011e-08	5.31e-10	0.000606309	1.5e-06	0.0299378	0.000155	8.73986	0.049	0.00858581	1.66e-05	0.282541	1.4e-05	1.46736	4e-05	1.88653	5.16e-05	6.27967	0.0311	0.0431339	0.00043	0.0269242	0.000196	0.0014758	1.49e-05	9.75674e-05	2.87e-05	-0.00151681	0	-0.00323377	2.06e-11	-0.0044491	2.11e-11	-0.0064408	0	-0.00238444	1.03e-11
SAFT10_9_TRA-128	2021-02-10	07:35:29	PM	0.742609	1.93e-05	-1.21787	0.00231	0.871187	0.000141	1.02527	0.000166	8.28679e-09	1.87e-08	7.85916e-08	5.06e-10	0.00140616	3.84e-06	0.0742727	0.000107	21.6627	0.0689	0.00858361	2.27e-05	0.282544	1.63e-05	1.46735	3.21e-05	1.88667	5.72e-05	5.31967	0.0196	0.0887188	0.000433	0.0521495	0.000167	0.0012071	9.18e-06	1.68684e-05	3.02e-05	-0.00149424	0	-0.00321498	1.88e-11	-0.00442277	2.59e-11	-0.00642429	3.56e-11	-0.00237815	0
SAFT10_10_TRA-129	2021-02-10	07:37:46	PM	0.742483	1.75e-05	-1.20285	0.00209	0.871618	0.000244	1.02478	0.000286	-1.12428e-09	1.36e-08	7.53543e-08	3.9e-10	0.00055593	7.02e-07	0.0256115	4.46e-05	7.46205	0.0185	0.00862779	1.44e-05	0.282538	1.26e-05	1.46736	4.08e-05	1.88671	4.8e-05	7.18436	0.0508	0.0420285	0.000366	0.0282808	0.000234	0.00157947	1.45e-05	6.53059e-06	2.94e-05	-0.00150584	6.24e-12	-0.00324349	2.21e-11	-0.0044202	0	-0.00644682	0	-0.00239114	8.72e-12
SAFT10_11_TRA-130	2021-02-10	07:40:14	PM	0.742476	2.13e-05	-1.20193	0.00255	0.871998	0.0003	1.0242	0.000355	-2.20726e-08	1.63e-08	7.01955e-08	4.1e-10	0.000559249	3.78e-07	0.0264879	4.4e-05	7.70937	0.0203	0.00865583	1.5e-05	0.282517	1.38e-05	1.46741	4.55e-05	1.88672	5.54e-05	6.74616	0.0506	0.040716	0.000357	0.0266838	0.000215	0.00137171	1.29e-05	-6.32128e-05	3.18e-05	-0.00151904	0	-0.00322896	0	-0.00440232	8.54e-12	-0.00641591	1.79e-11	-0.00237826	0
SAFT10_12_TRA-133	2021-02-10	07:49:52	PM	0.742447	2.14e-05	-1.19854	0.00256	0.872229	0.000238	1.02402	0.000281	3.70267e-08	1.45e-08	8.94818e-08	4.3e-10	0.000628074	3.75e-07	0.0303339	5.1e-05	8.79015	0.0216	0.00862756	1.41e-05	0.282512	1.46e-05	1.46743	4.36e-05	1.8868	5.84e-05	6.94711	0.0312	0.0477818	0.000275	0.0308695	0.000153	0.00181168	1.13e-05	9.24338e-05	2.96e-05	-0.00152782	6.87e-12	-0.00323804	9.62e-12	-0.0044385	0	-0.00644946	0	-0.00239104	0
SAFT10_13_TRA-134	2021-02-10	07:53:33	PM	0.742513	2.28e-05	-1.2068	0.00271	0.8721	0.00025	1.02421	0.000294	-1.4048e-08	1.73e-08	9.29416e-08	4.76e-10	0.00078169	3.59e-06	0.0372277	0.000195	10.849	0.0602	0.00861243	1.81e-05	0.282532	1.63e-05	1.46732	4.45e-05	1.88671	6.01e-05	5.80549	0.0391	0.0489137	0.000551	0.0321589	0.000362	0.00157808	1.4e-05	-1.63442e-05	3e-05	-0.00153484	5.55e-12	-0.00324553	0	-0.00443781	2.41e-11	-0.00643486	0	-0.00240081	1.12e-11
SAFT10_14_TRA-135	2021-02-10	07:56:08	PM	0.742403	1.48e-05	-1.19327	0.00178	0.87166	5.65e-05	1.02471	6.64e-05	-2.85363e-08	1.17e-08	4.5773e-07	2.77e-09	0.00219902	6.75e-06	0.117036	0.000716	34.2561	0.22	0.00856468	1.37e-05	0.282524	1.07e-05	1.46733	2.72e-05	1.88668	4.5e-05	9.05461	0.0396	0.241598	0.00248	0.141248	0.000985	0.0120682	0.000123	-7.43454e-05	3.14e-05	-0.00150802	8.1e-12	-0.00321023	0	-0.00442072	0	-0.00643368	0	-0.00234439	5.44e-12
SAFT10_15_TRA-136	2021-02-10	07:58:51	PM	0.742386	1.97e-05	-1.19118	0.00236	0.871754	0.000218	1.02458	0.000254	-3.35505e-08	1.32e-08	4.43449e-08	3.61e-10	0.000696968	4.54e-06	0.034511	0.000353	10.0136	0.101	0.0086051	1.68e-05	0.282513	1.4e-05	1.46745	3.42e-05	1.88673	5.35e-05	7.15437	0.0366	0.0566169	0.000861	0.0356821	0.000426	0.000926311	9.92e-06	-6.88733e-05	2.8e-05	-0.00149445	5.91e-12	-0.00320455	0	-0.00440803	1.55e-11	-0.00640346	0	-0.00232404	0
SAFT10_16_TRA-137	2021-02-10	08:01:25	PM	0.742435	1.85e-05	-1.19701	0.00221	0.871445	0.000134	1.02497	0.000158	-3.08049e-08	1.39e-08	2.46903e-07	1.69e-09	0.00106923	2.21e-06	0.0539398	0.000161	15.7978	0.0591	0.00864391	1.57e-05	0.282506	1.28e-05	1.4674	3.78e-05	1.88674	5.38e-05	7.41203	0.0467	0.0915075	0.000857	0.0563287	0.000465	0.0053764	6.92e-05	-6.04039e-05	3.12e-05	-0.00148934	6.78e-12	-0.00320774	0	-0.00441781	0	-0.00643965	4.79e-11	-0.00235659	0
SAFT10_18_TRA-141	2021-02-10	08:12:15	PM	0.742538	2.77e-05	-1.20939	0.00332	0.871688	0.000165	1.02469	0.000194	2.44091e-08	1.6e-08	6.49028e-08	4.57e-10	0.000963019	4.09e-06	0.0461042	0.000286	13.4448	0.0887	0.00861703	1.61e-05	0.282547	1.62e-05	1.46734	5.52e-05	1.8867	7.02e-05	6.49189	0.0337	0.0684279	0.000639	0.0444396	0.000365	0.00122744	1.15e-05	5.13146e-05	3.05e-05	-0.00146757	3.23e-12	-0.00320247	0	-0.00439718	0	-0.00641923	0	-0.00234675	1.3e-11
SAFT10_19_TRA-142	2021-02-10	08:15:19	PM	0.742435	2.17e-05	-1.19709	0.0026	0.872006	0.000234	1.02428	0.000273	-1.17706e-08	1.64e-08	8.61356e-08	4.11e-10	0.00074886	1.2e-06	0.0345914	8.36e-05	10.0569	0.0335	0.00864439	1.75e-05	0.282555	1.49e-05	1.4675	3.9e-05	1.88667	6.26e-05	6.184	0.0366	0.0490562	0.000423	0.0328685	0.000245	0.00154199	1.07e-05	-1.57967e-05	3.04e-05	-0.00147057	7.29e-12	-0.00319698	1.57e-11	-0.00437561	1.82e-11	-0.00639611	0	-0.0023334	0
SAFT10_20_TRA-143	2021-02-10	08:17:24	PM	0.742464	2.13e-05	-1.20054	0.00255	0.871532	0.000137	1.02484	0.00016	1.72338e-08	1.6e-08	8.75789e-08	5.21e-10	0.00122794	4.68e-06	0.0625888	0.000321	18.3414	0.105	0.00860455	1.94e-05	0.282511	1.47e-05	1.46741	3.65e-05	1.88683	6.04e-05	6.14186	0.0506	0.0889533	0.00112	0.0542803	0.000645	0.00157992	1.54e-05	3.46514e-05	2.82e-05	-0.00146805	0	-0.00320772	0	-0.00440013	5.45e-12	-0.00640879	3.47e-11	-0.00234234	0
SAFT10_21_TRA-144	2021-02-10	08:20:52	PM	0.74243	2.34e-05	-1.19651	0.0028	0.871398	0.000547	1.02512	0.000644	-4.52921e-08	1.81e-08	6.34839e-08	8.19e-10	0.000378145	1.66e-06	0.0177517	6.16e-05	5.1399	0.023	0.00866502	2.12e-05	0.28252	1.59e-05	1.46746	3.77e-05	1.88676	5.87e-05	5.48708	0.0626	0.0220064	0.000227	0.0144954	0.00012	0.00101235	1.21e-05	-4.77587e-05	2.91e-05	-0.00146554	0	-0.00320043	7.96e-12	-0.0044056	0	-0.00641617	3.66e-11	-0.00233936	0
SAFT10_22_TRA-147	2021-02-10	08:30:32	PM	0.742374	1.89e-05	-1.1897	0.00226	0.872316	0.000306	1.02397	0.000359	2.62541e-08	1.43e-08	7.28215e-08	4.9e-10	0.000514447	2.65e-07	0.0246883	6.16e-05	7.2156	0.0243	0.00860386	1.65e-05	0.282504	1.48e-05	1.46744	3.66e-05	1.88676	5.63e-05	6.42122	0.0351	0.036278	0.000286	0.0233316	0.000133	0.00136685	1.42e-05	4.92104e-05	2.75e-05	-0.00146841	1.98e-12	-0.00320919	2.59e-11	-0.00440278	3.02e-11	-0.00640894	0	-0.00234694	0
SAFT10_23_TRA-148	2021-02-10	08:33:09	PM	0.742309	1.96e-05	-1.18203	0.00234	0.871728	0.000225	1.02465	0.000265	2.7156e-08	1.6e-08	7.43072e-08	4.07e-10	0.000694234	6.9e-06	0.0353176	0.000472	10.2756	0.14	0.00863271	1.57e-05	0.282487	1.36e-05	1.4674	3.72e-05	1.88677	6.11e-05	6.39289	0.0196	0.0521893	0.000852	0.0317549	0.000413	0.00138335	8.51e-06	4.47356e-05	3e-05	-0.00145473	5.95e-12	-0.00321098	0	-0.00439539	1.07e-11	-0.00641055	2.53e-11	-0.00234169	0
SAFT10_25_TRA-150	2021-02-10	08:37:36	PM	0.74248	2.34e-05	-1.2024	0.0028	0.871267	0.0002	1.02516	0.000237	-1.74805e-08	1.83e-08	1.3041e-07	5.67e-10	0.000967681	5.87e-06	0.0471557	0.000198	13.6524	0.0623	0.00864915	1.91e-05	0.282522	1.56e-05	1.46753	4.84e-05	1.88705	6.45e-05	5.52084	0.0334	0.0593041	0.000183	0.0379652	0.000124	0.00211052	1.67e-05	-2.50511e-05	3.01e-05	-0.00144223	0	-0.00318031	0	-0.00438607	1.49e-11	-0.00639449	0	-0.00234982	1.74e-11
SAFT10_26_TRA-151	2021-02-10	08:41:13	PM	0.742333	1.96e-05	-1.18483	0.00234	0.872452	0.000225	1.02372	0.000263	-6.39341e-09	1.55e-08	8.76326e-08	4.3e-10	0.000648444	2.23e-07	0.0319545	9.39e-05	9.29303	0.0323	0.00865107	1.59e-05	0.28253	1.32e-05	1.46743	3.42e-05	1.88692	5.86e-05	6.43865	0.0336	0.0470721	0.000379	0.0294635	0.000155	0.00164778	1.36e-05	-6.20048e-06	3.03e-05	-0.00147235	0	-0.00318504	0	-0.00439429	0	-0.0064144	2.71e-11	-0.00233487	0
SAFT10_27_TRA-154	2021-02-10	08:56:43	PM	0.742307	2.13e-05	-1.18175	0.00255	0.871796	0.000137	1.02456	0.000161	-1.16322e-09	1.99e-08	6.57873e-08	4.92e-10	0.00121102	1.07e-06	0.0626055	5.29e-05	18.1219	0.0474	0.00863623	2.04e-05	0.282514	1.54e-05	1.46732	4.29e-05	1.88665	5.54e-05	5.80134	0.0485	0.0822497	0.000647	0.0495823	0.000418	0.00110788	9.83e-06	-5.10353e-06	3.4e-05	-0.00142853	0	-0.00315898	0	-0.00435184	0	-0.00640961	2.29e-11	-0.00230667	1.75e-11
SAFT10_29_TRA-155	2021-02-10	09:00:37	PM	0.742256	1.83e-05	-1.17558	0.0022	0.871818	5.93e-05	1.02452	6.96e-05	-1.5568e-08	1.04e-08	4.95527e-07	1.54e-09	0.00233627	1.12e-05	0.110243	0.000375	32.3858	0.125	0.00849945	1.62e-05	0.282461	1.21e-05	1.46751	3.82e-05	1.88689	4.85e-05	10.5453	0.0555	0.262266	0.000563	0.173119	0.000258	0.0152794	4e-05	-3.86159e-05	3.31e-05	-0.00144306	6.76e-12	-0.00316358	0	-0.00436847	2.39e-11	-0.00639199	0	-0.002319	0
SAFT10_30_TRA-156	2021-02-10	09:02:46	PM	0.742139	1.57e-05	-1.16158	0.00188	0.871781	0.000186	1.02455	0.00022	-2.12132e-08	9.42e-09	2.33738e-07	6.41e-10	0.000530669	1.59e-06	0.0244911	3.16e-05	7.10736	0.0141	0.00865588	1.01e-05	0.282503	9.55e-06	1.4674	2.78e-05	1.88689	4.04e-05	11.6387	0.055	0.0651382	0.000287	0.0437519	0.000114	0.0078414	2.12e-05	-7.42629e-05	3.27e-05	-0.00141981	1.01e-11	-0.00316901	0	-0.00435749	0	-0.00640146	0	-0.00229666	0
SAFT10_32_TRA-157	2021-02-10	09:05:28	PM	0.742286	2.11e-05	-1.17916	0.00253	0.871867	0.000103	1.02447	0.000121	-2.90534e-09	1.02e-08	5.80131e-07	4.56e-09	0.00106537	1.24e-05	0.0536649	0.00055	15.6645	0.17	0.00857791	1.18e-05	0.282484	1.3e-05	1.46749	4.96e-05	1.88682	5.28e-05	9.83476	0.0448	0.117372	0.00071	0.0732717	0.00056	0.0162074	5.95e-05	-4.11579e-06	2.99e-05	-0.00142238	0	-0.00317519	8.05e-12	-0.00434603	1.8e-11	-0.00638085	3.59e-11	-0.00229989	0
SAFT10_33_TRA-158	2021-02-10	09:09:35	PM	0.742216	2.03e-05	-1.17078	0.00243	0.872253	0.000246	1.02399	0.000292	-9.6814e-09	1.51e-08	7.126e-08	3.78e-10	0.000580342	8.88e-07	0.0279501	4.38e-05	8.09289	0.0203	0.00867003	1.44e-05	0.28254	1.35e-05	1.46738	3.23e-05	1.88672	5.57e-05	6.97259	0.0315	0.044342	0.000269	0.0285501	9.02e-05	0.00143935	1.12e-05	-1.12469e-05	3.13e-05	-0.00142416	0	-0.00316348	0	-0.00435011	1.73e-11	-0.00639448	3.36e-11	-0.00228008	0
SAFT10_34_TRA-161	2021-02-10	09:20:02	PM	0.742211	2.04e-05	-1.17024	0.00244	0.871353	0.000294	1.0251	0.000346	7.7377e-09	1.6e-08	6.83738e-08	4.14e-10	0.000569669	7.27e-07	0.0269423	3.13e-05	7.86388	0.0211	0.00860593	1.82e-05	0.2825	1.45e-05	1.46741	3.52e-05	1.88684	5.57e-05	6.27978	0.0353	0.0384668	0.000246	0.0252931	0.000107	0.0012456	1.06e-05	1.39079e-05	3.03e-05	-0.00138999	1.03e-11	-0.00311698	0	-0.00432094	2.62e-11	-0.00634823	0	-0.00224911	0
SAFT10_35_TRA-162	2021-02-10	09:22:31	PM	0.742231	1.99e-05	-1.17267	0.00238	0.871446	0.000258	1.02494	0.000302	8.61138e-09	1.98e-08	5.57213e-08	5.9e-10	0.000842201	3.55e-06	0.0383946	5.84e-05	11.1448	0.0348	0.0086084	2.04e-05	0.2825	1.65e-05	1.46739	4.25e-05	1.88684	6.14e-05	5.2115	0.0228	0.0451277	0.000153	0.0307797	7.93e-05	0.000842497	1.09e-05	1.41924e-05	3.04e-05	-0.00139008	9.59e-12	-0.00314031	0	-0.00434948	0	-0.00636801	3.85e-11	-0.00228096	1.67e-11
SAFT10_36_TRA-163	2021-02-10	09:25:22	PM	0.742171	1.83e-05	-1.1655	0.00219	0.871726	0.000203	1.02465	0.000238	8.10483e-09	1.23e-08	1.25588e-07	6.51e-10	0.000626924	7.55e-07	0.0302407	0.000149	8.7868	0.0451	0.00861409	1.28e-05	0.282489	1.11e-05	1.46745	2.84e-05	1.88695	4.96e-05	7.98836	0.0217	0.0548998	0.000407	0.0353918	0.000136	0.00291168	2.2e-05	1.51608e-05	2.91e-05	-0.00139508	0	-0.00313424	0	-0.00433652	0	-0.00633534	0	-0.00227297	1.26e-11
SAFT10_37_TRA-164	2021-02-10	09:27:59	PM	0.742108	2.48e-05	-1.15786	0.00297	0.871654	0.000139	1.02472	0.000164	-5.9173e-09	1.39e-08	1.88281e-07	5.74e-10	0.0012408	3.24e-06	0.0578495	0.000261	16.8115	0.0799	0.00859739	1.65e-05	0.28251	1.5e-05	1.4675	5.25e-05	1.8869	6.19e-05	7.28848	0.0466	0.0961655	0.00104	0.0642594	0.000575	0.00397916	3.35e-05	-1.89701e-06	2.98e-05	-0.00138967	8.34e-12	-0.00315016	0	-0.00434034	0	-0.00636241	0	-0.00226498	1.47e-11
SAFT10_39_TRA-165	2021-02-10	09:30:28	PM	0.742147	1.85e-05	-1.16261	0.00222	0.871862	9.13e-05	1.02448	0.000107	-2.55542e-08	1.25e-08	2.78365e-07	3.68e-09	0.00173938	1.44e-05	0.0903875	0.000858	26.5145	0.26	0.00857164	1.83e-05	0.28251	1.31e-05	1.46749	3.88e-05	1.88684	5.28e-05	7.96479	0.059	0.165154	0.00196	0.0984881	0.000979	0.00659316	0.000127	-5.19179e-05	2.98e-05	-0.00139123	7e-12	-0.00313432	2.18e-11	-0.00431944	0	-0.00634852	0	-0.00223101	1.08e-11
SAFT10_40_TRA-168	2021-02-10	09:38:26	PM	0.742122	1.92e-05	-1.15961	0.0023	0.871328	0.000354	1.02509	0.000414	3.09546e-08	1.44e-08	6.72084e-08	5.22e-10	0.000489169	2.2e-06	0.0235261	0.000133	6.87676	0.0399	0.00864163	1.66e-05	0.282511	1.35e-05	1.4675	3.99e-05	1.88688	5.53e-05	6.36868	0.0363	0.0342964	0.000378	0.0221913	0.000225	0.00123356	1.36e-05	6.3597e-05	2.69e-05	-0.00137228	0	-0.00313608	0	-0.00432155	0	-0.00634592	0	-0.00225567	0
SAFT10_41_TRA-169	2021-02-10	09:41:54	PM	0.742125	2.14e-05	-1.16001	0.00256	0.872163	0.000182	1.02413	0.000214	-3.16535e-08	1.58e-08	9.76601e-07	3.81e-08	0.000886453	4.1e-06	0.0428076	0.000184	12.3491	0.0595	0.00865252	1.76e-05	0.282508	1.46e-05	1.46732	4.04e-05	1.88695	6.23e-05	6.30234	0.0199	0.0613255	0.000242	0.0395402	0.00019	0.0184165	0.000753	-6.21407e-05	2.97e-05	-0.00139725	5.47e-12	-0.0031064	0	-0.00432026	0	-0.00634098	2.25e-11	-0.00226213	0
SAFT10_42_TRA-170	2021-02-10	09:43:56	PM	0.742291	2.55e-05	-1.17982	0.00305	0.871766	0.000403	1.02465	0.000473	1.96442e-08	1.99e-08	7.86677e-08	9.86e-10	0.0005088	5.12e-07	0.0251454	3.02e-05	7.33998	0.0217	0.00861103	2.16e-05	0.282542	1.81e-05	1.46751	4.94e-05	1.88691	6.89e-05	5.16698	0.03	0.0296478	0.000191	0.0186856	0.000123	0.00122231	2.11e-05	3.95568e-05	3.14e-05	-0.00140084	4.22e-12	-0.0031144	1.31e-11	-0.00430928	1.82e-11	-0.00633297	0	-0.00224452	0
SAFT10_43_TRA-171	2021-02-10	09:46:14	PM	0.742241	1.94e-05	-1.17382	0.00233	0.871956	0.000229	1.02438	0.00027	6.94321e-09	1.5e-08	7.69914e-08	5.55e-10	0.000689315	1.11e-06	0.0326932	0.000154	9.5184	0.0486	0.00865021	1.65e-05	0.282443	1.29e-05	1.46735	3.52e-05	1.88694	5.32e-05	6.3845	0.0124	0.0473112	0.000295	0.0310671	9.75e-05	0.00142648	1.23e-05	1.61641e-05	2.94e-05	-0.00137947	0	-0.00313051	1.83e-11	-0.0043135	2.34e-11	-0.0063587	4.3e-11	-0.00225047	0
SAFT10_44_TRA-172	2021-02-10	09:48:25	PM	0.742251	2.02e-05	-1.17499	0.00241	0.872551	0.000299	1.0237	0.00035	-2.35688e-08	1.52e-08	6.61622e-08	4.54e-10	0.000536067	8.34e-07	0.0250722	2.61e-05	7.29178	0.0171	0.00864417	1.64e-05	0.282519	1.31e-05	1.46743	3.58e-05	1.88691	5.37e-05	6.23308	0.0381	0.0355947	0.000255	0.0235436	0.000113	0.00119152	1.15e-05	-3.75511e-05	2.9e-05	-0.00137264	0	-0.00310118	1.28e-11	-0.00429258	2.11e-11	-0.00633181	3.81e-11	-0.0022412	0
SAFT10_45_TRA-175	2021-02-10	09:56:55	PM	0.742199	2.25e-05	-1.16917	0.00267	0.871763	0.000353	1.02463	0.000415	1.48179e-08	2.02e-08	6.08288e-08	4.94e-10	0.000499621	2.72e-07	0.0248825	3.38e-05	7.16988	0.0212	0.00865698	1.95e-05	0.282519	1.48e-05	1.46741	4.12e-05	1.88693	6.23e-05	5.513	0.0437	0.0309851	0.000271	0.019378	0.00015	0.00096851	1.09e-05	2.23889e-05	3.28e-05	-0.00137925	8.64e-12	-0.0031044	1.57e-11	-0.00430845	1.59e-11	-0.00635409	0	-0.00224913	0
SAFT10_46_TRA-176	2021-02-10	09:59:24	PM	0.742133	1.93e-05	-1.16092	0.00231	0.872466	0.000236	1.02378	0.000277	-1.16452e-08	1.47e-08	8.00325e-08	4.25e-10	0.000670116	4.36e-07	0.0316544	5.51e-05	9.2037	0.0247	0.00862126	1.6e-05	0.282533	1.33e-05	1.46748	3.61e-05	1.88671	5.28e-05	6.52132	0.037	0.0469853	0.000341	0.0309284	0.000193	0.00151603	1.26e-05	-2.62728e-05	2.9e-05	-0.001395	5.15e-12	-0.00311685	0	-0.00430492	2.41e-11	-0.00635162	0	-0.00225027	6.87e-12
SAFT10_48_TRA-177	2021-02-10	10:03:35	PM	0.742228	2.07e-05	-1.17229	0.00248	0.87189	0.000294	1.02422	0.000334	-8.10763e-08	1.98e-08	8.07484e-08	5.92e-10	0.000640933	3.11e-07	0.0314625	9.72e-05	9.16849	0.037	0.00862058	1.87e-05	0.282508	1.51e-05	1.46741	3.34e-05	1.88677	5.99e-05	5.44496	0.0387	0.0393133	0.000395	0.0246527	0.000181	0.00127941	1.53e-05	-0.00012341	3.09e-05	-0.00136898	8.39e-12	-0.00310346	0	-0.00431326	0	-0.00632879	2.11e-11	-0.00226078	0
SAFT10_49_TRA-178	2021-02-10	10:06:32	PM	0.742152	1.96e-05	-1.16321	0.00235	0.871972	0.000276	1.02437	0.000324	5.45564e-09	1.53e-08	8.12228e-08	5.6e-10	0.000525742	1.22e-06	0.0264137	0.000133	7.67596	0.0434	0.00861779	1.66e-05	0.282497	1.27e-05	1.46748	3.31e-05	1.88668	5.3e-05	6.28712	0.0461	0.0378738	0.000458	0.0233205	0.00022	0.00147859	1.81e-05	2.09619e-06	2.85e-05	-0.00141028	8.1e-12	-0.00314868	0	-0.00434272	0	-0.00637228	3.47e-11	-0.00228263	1.12e-11
SAFT10_50_TRA-179	2021-02-10	10:09:24	PM	0.742135	1.93e-05	-1.16118	0.00231	0.872754	0.00029	1.02346	0.00034	-1.09672e-08	1.58e-08	8.06244e-08	4.73e-10	0.000544806	2.09e-07	0.0261438	6.47e-05	7.59127	0.0232	0.00865747	1.59e-05	0.282524	1.22e-05	1.46746	3.46e-05	1.88674	5.28e-05	6.72025	0.0409	0.040043	0.000332	0.0258288	0.000154	0.00157646	1.49e-05	-1.34658e-06	3.15e-05	-0.0014261	0	-0.0031574	0	-0.00433733	0	-0.00637557	0	-0.00228089	0
SAFT10_51_TRA-182	2021-02-10	10:18:22	PM	0.742081	2.06e-05	-1.15474	0.00247	0.871851	0.000258	1.02451	0.000303	-1.43774e-08	1.47e-08	8.87734e-08	4.54e-10	0.000599132	6.12e-07	0.0295336	4.41e-05	8.56838	0.0198	0.00864834	1.66e-05	0.282515	1.33e-05	1.46743	3.28e-05	1.88694	5.59e-05	6.19879	0.0479	0.0415498	0.000374	0.0259762	0.00019	0.0015818	1.5e-05	-1.88079e-05	2.74e-05	-0.00144443	0	-0.00316295	0	-0.00436251	0	-0.00640532	0	-0.00231556	0
SAFT10_52_TRA-183	2021-02-10	10:21:57	PM	0.742104	1.9e-05	-1.1574	0.00228	0.871671	0.000328	1.02473	0.000385	4.35911e-08	1.62e-08	6.41064e-08	4.36e-10	0.000500834	1.65e-06	0.0240999	4.86e-05	7.01159	0.0214	0.00859028	1.58e-05	0.282513	1.37e-05	1.46744	3.54e-05	1.88691	5.6e-05	6.15474	0.0305	0.0336719	0.000126	0.0217236	3.84e-05	0.00116099	8.92e-06	8.39946e-05	2.91e-05	-0.00144493	0	-0.00316731	0	-0.00436587	1.57e-11	-0.00637728	3.92e-11	-0.00232074	9.13e-12
SAFT10_17_TRA-140	2021-02-10	11:11:48	PM	0.742496	1.85e-05	-1.20436	0.00221	0.871626	9.9e-05	1.02475	0.000116	3.21747e-08	1.38e-08	4.48786e-07	4.39e-09	0.00142547	3.36e-06	0.0725991	0.000378	21.07	0.116	0.00861239	1.65e-05	0.282479	1.36e-05	1.46741	3.66e-05	1.88675	5.28e-05	7.36827	0.0274	0.121302	0.000769	0.0742732	0.000195	0.00967671	0.000109	6.75896e-05	3.03e-05	-0.00146335	1.01e-11	-0.00319651	8.22e-12	-0.00438988	1.87e-11	-0.0064205	0	-0.00235543	0
SAFT10_24_TRA-149	2021-02-10	11:16:52	PM	0.742396	2.27e-05	-1.19237	0.00271	0.872036	0.000214	1.02428	0.000252	3.38307e-08	1.69e-08	6.91848e-08	4.76e-10	0.000855501	8.8e-06	0.0443862	0.000546	12.9193	0.164	0.00862379	1.79e-05	0.28254	1.64e-05	1.46733	4.49e-05	1.8866	6.29e-05	6.11361	0.0277	0.0629774	0.00103	0.0377353	0.000551	0.00123466	7.97e-06	6.65842e-05	3.16e-05	-0.00147985	0	-0.00320748	0	-0.00439787	2.06e-11	-0.0064242	2.27e-11	-0.00237172	1.41e-11
FC1	2021-02-10	01:17:58	PM	0.743136	2.21e-05	-1.2809	0.00264	0.870472	0.000144	1.02611	0.00017	-3.31128e-09	1.66e-08	7.56652e-09	4.29e-10	0.000939911	2.9e-07	0.0526602	0.000118	15.3888	0.0481	0.00861645	1.79e-05	0.282125	1.4e-05	1.46701	3.86e-05	1.88649	5.52e-05	6.19382	0.0432	0.074296	0.000667	0.0410876	0.000296	0.000134147	7.59e-06	4.79973e-06	3.04e-05	-0.002026	0	-0.00378457	7.87e-12	-0.00494902	0	-0.00695258	2.32e-11	-0.00293651	0
FC2	2021-02-10	01:19:59	PM	0.743242	2.18e-05	-1.29357	0.00261	0.870381	0.000123	1.02622	0.000145	3.29235e-08	1.49e-08	7.32697e-09	4.01e-10	0.00113099	2.64e-06	0.065255	9.27e-05	19.0873	0.0471	0.00858134	1.69e-05	0.282169	1.38e-05	1.46713	3.73e-05	1.88666	5.69e-05	6.62306	0.0463	0.0975604	0.000586	0.0526483	0.000273	0.000140709	7.72e-06	4.27465e-05	3e-05	-0.0020064	0	-0.00376377	8.77e-12	-0.0049427	9.36e-12	-0.00692104	3.87e-11	-0.00294028	0
FC1_1	2021-02-10	01:20:29	PM	0.743136	2.21e-05	-1.2809	0.00264	0.870472	0.000144	1.02611	0.00017	-3.31127e-09	1.66e-08	7.56652e-09	4.29e-10	0.000939911	2.9e-07	0.0526271	0.000118	15.3888	0.0481	0.00861645	1.79e-05	0.282158	1.4e-05	1.46701	3.86e-05	1.88649	5.52e-05	6.19386	0.0432	0.074296	0.000667	0.0410876	0.000296	0.000134147	7.59e-06	4.79974e-06	3.04e-05	-0.002026	0	-0.00378457	2e-11	-0.00494902	2.66e-11	-0.00695258	4.04e-11	-0.00293651	0
FC2_2	2021-02-10	01:21:07	PM	0.743242	2.18e-05	-1.29357	0.00261	0.870381	0.000123	1.02622	0.000145	3.29235e-08	1.49e-08	7.32697e-09	4.01e-10	0.00113099	2.64e-06	0.0652386	9.27e-05	19.0873	0.0471	0.00858134	1.69e-05	0.282187	1.37e-05	1.46713	3.73e-05	1.88666	5.69e-05	6.62308	0.0463	0.0975604	0.000586	0.0526483	0.000273	0.000140709	7.72e-06	4.27465e-05	3e-05	-0.0020064	0	-0.00376377	0	-0.0049427	2.93e-11	-0.00692104	1.82e-11	-0.00294028	1.08e-11
FC1_2	2021-02-10	01:21:33	PM	0.743136	2.21e-05	-1.2809	0.00264	0.870472	0.000144	1.02611	0.00017	-3.31127e-09	1.66e-08	7.56652e-09	4.29e-10	0.000939911	2.9e-07	0.0526139	0.000118	15.3888	0.0481	0.00861645	1.79e-05	0.282172	1.4e-05	1.46701	3.86e-05	1.88649	5.52e-05	6.19388	0.0432	0.074296	0.000667	0.0410876	0.000296	0.000134147	7.59e-06	4.79974e-06	3.04e-05	-0.002026	0	-0.00378457	2e-11	-0.00494902	2.66e-11	-0.00695258	4.04e-11	-0.00293651	0
FC3	2021-02-10	01:27:17	PM	0.743528	2.16e-05	-1.3278	0.00258	0.870138	0.000214	1.02648	0.000253	7.5725e-08	1.49e-08	1.97497e-08	3.6e-10	0.000679833	2.16e-06	0.0367541	8.83e-05	10.7112	0.0341	0.00860418	1.57e-05	0.28214	1.41e-05	1.4671	4.49e-05	1.88671	5.94e-05	7.01358	0.037	0.0584633	0.000205	0.0335794	8.03e-05	0.000396207	7.02e-06	0.00014833	3.08e-05	-0.00194248	1.07e-11	-0.00370633	2.34e-11	-0.00483905	0	-0.0068695	0	-0.00283327	0
FC4	2021-02-10	01:28:59	PM	0.743427	2.33e-05	-1.31569	0.00279	0.870647	0.000164	1.02588	0.000195	3.80238e-09	1.37e-08	1.83843e-08	3.95e-10	0.000736959	3.42e-06	0.0398872	0.000278	11.5597	0.0814	0.0086508	1.45e-05	0.282175	1.46e-05	1.46706	5.1e-05	1.88667	6.18e-05	7.13304	0.0362	0.0650509	0.000718	0.0372812	0.000335	0.000378981	8.26e-06	1.7442e-06	2.91e-05	-0.00194657	0	-0.00369329	1.93e-11	-0.00484022	0	-0.0068844	0	-0.0028168	0
FC5	2021-02-10	01:34:40	PM	0.743335	2.26e-05	-1.30502	0.00271	0.869993	0.000118	1.02668	0.00014	5.56501e-09	1.4e-08	3.82734e-08	8.43e-10	0.00105822	9.46e-06	0.0586927	0.000621	17.1484	0.185	0.00859334	1.58e-05	0.282195	1.56e-05	1.46699	5.26e-05	1.88673	5.9e-05	7.31	0.04	0.0991019	0.00147	0.0550893	0.000731	0.000831795	2.09e-05	1.34628e-05	3.05e-05	-0.00188069	0	-0.00362307	0	-0.00479642	0	-0.00680138	0	-0.00275948	1.61e-11
FC6	2021-02-10	02:04:53	PM	0.743358	1.85e-05	-1.30743	0.00221	0.870767	0.000123	1.02577	0.000145	-3.99658e-09	1.01e-08	1.91948e-08	2.93e-10	0.000779646	2.04e-06	0.0457969	0.000261	13.2469	0.0764	0.00866982	1.07e-05	0.282181	1.18e-05	1.4671	4.29e-05	1.88663	4.56e-05	9.76062	0.0369	0.101514	0.000942	0.0536536	0.000333	0.000547117	8.89e-06	-1.84049e-05	2.97e-05	-0.00171749	0	-0.00347061	0	-0.00459269	0	-0.0066489	0	-0.00256574	0
FC7	2021-02-10	02:07:19	PM	0.743428	1.86e-05	-1.31587	0.00223	0.870417	9.02e-05	1.02618	0.000106	-8.41411e-09	7.57e-09	2.59309e-08	2.05e-10	0.000729021	1.39e-06	0.0432679	0.000189	12.6182	0.0575	0.00860021	9.36e-06	0.282147	1.08e-05	1.46698	3.73e-05	1.88664	4.39e-05	13.1099	0.021	0.12822	0.000578	0.0675251	0.000161	0.000984761	7.9e-06	-2.8703e-05	2.94e-05	-0.00171017	1.07e-11	-0.00347304	0	-0.00463078	3.89e-11	-0.00665849	1.12e-11	-0.00257665	0
FC8	2021-02-10	02:09:24	PM	0.743449	1.75e-05	-1.31832	0.00209	0.870706	0.00013	1.02584	0.000154	3.2445e-09	8.99e-09	3.40347e-08	2.8e-10	0.00068106	9.43e-07	0.0411395	0.00017	11.9975	0.0526	0.00860287	1.09e-05	0.28214	1.07e-05	1.46697	3.27e-05	1.88663	4.41e-05	10.7646	0.0223	0.100179	0.000532	0.051724	0.000156	0.0010659	9.33e-06	1.42015e-05	2.89e-05	-0.00170987	0	-0.00346758	8.04e-12	-0.00461525	0	-0.0066471	3.41e-11	-0.00256309	1.57e-11
FC9	2021-02-10	02:12:34	PM	0.743174	1.67e-05	-1.28543	0.00199	0.870089	0.000102	1.02656	0.00012	9.00001e-09	1.04e-08	5.58334e-08	2.87e-10	0.00127424	1.35e-06	0.0681728	0.000111	19.7578	0.0459	0.00865121	1.37e-05	0.282256	1.05e-05	1.46702	3.33e-05	1.88659	4.54e-05	8.93936	0.0199	0.137857	0.000472	0.0808647	0.00016	0.00145017	8.62e-06	2.51158e-05	2.83e-05	-0.00168771	0	-0.00344813	0	-0.00459372	0	-0.00662073	2.91e-11	-0.00254881	7.12e-12
FC10	2021-02-10	02:19:48	PM	0.743144	1.6e-05	-1.28185	0.00192	0.870193	5.58e-05	1.02644	6.58e-05	2.65535e-10	1.02e-08	8.0982e-08	3.11e-10	0.0019185	2.52e-06	0.111744	0.000147	32.6328	0.0658	0.0086078	1.47e-05	0.282304	1.03e-05	1.46704	3.29e-05	1.88667	4.11e-05	9.7374	0.0377	0.245843	0.00111	0.131321	0.000379	0.00228621	1.46e-05	1.10571e-05	2.96e-05	-0.00167223	0	-0.00341313	0	-0.00458501	2.41e-11	-0.00661179	4.24e-11	-0.0025253	0
FC11	2021-02-10	02:33:26	PM	0.74329	1.46e-05	-1.29934	0.00174	0.870657	0.000106	1.02588	0.000124	5.29124e-09	1e-08	2.42874e-08	3.06e-10	0.000904101	3.26e-06	0.0541832	0.000274	15.7863	0.084	0.00860913	1.2e-05	0.282183	9.73e-06	1.46714	3.54e-05	1.88664	4.09e-05	9.45507	0.0399	0.115779	0.000998	0.0602642	0.000454	0.000660184	9.75e-06	8.8432e-06	2.75e-05	-0.00164276	0	-0.00338365	1.75e-11	-0.00456286	3.15e-11	-0.00658032	5.16e-11	-0.00247887	8.9e-12
FC12_TRA-46	2021-02-10	02:58:03	PM	0.743236	1.68e-05	-1.29285	0.00201	0.870036	5.73e-05	1.02662	6.77e-05	-2.56891e-08	1.15e-08	8.27261e-08	3.57e-10	0.0020834	4.74e-06	0.123631	0.000115	36.0855	0.078	0.00860009	1.67e-05	0.282315	1.09e-05	1.46705	3e-05	1.88652	5.2e-05	8.21693	0.0161	0.230167	0.000446	0.120475	0.000171	0.00197769	1e-05	-5.97752e-05	2.87e-05	-0.00158812	0	-0.00331295	8.55e-12	-0.00450501	0	-0.00652141	0	-0.0024197	0
FC13_TRA-48	2021-02-10	03:06:16	PM	0.742284	3.03e-05	-1.17893	0.00363	0.87161	9.07e-05	1.02477	0.000107	2.15943e-09	1.1e-08	4.54653e-08	2.82e-10	0.0010654	3.24e-07	0.0634034	0.000161	18.3943	0.0564	0.00865402	1.26e-05	0.282206	1.2e-05	1.46711	4.16e-05	1.88678	5.38e-05	9.39152	0.0186	0.135203	0.000557	0.0706839	0.00013	0.00123839	8.34e-06	6.19671e-06	3.08e-05	-0.00157907	9.37e-12	-0.00330606	1.92e-11	-0.00448245	0	-0.00652502	3.75e-11	-0.00241846	1.67e-11
FC14_TRA-55	2021-02-10	03:34:30	PM	0.742888	2.57e-05	-1.25124	0.00308	0.871147	0.000124	1.02529	0.000145	7.00801e-10	1.64e-08	3.19265e-08	7.87e-10	0.00148453	2.68e-05	0.0669702	0.000368	19.291	0.133	0.00859414	1.93e-05	0.282224	1.69e-05	1.46739	5.07e-05	1.8863	6.4e-05	8.5455	0.227	0.123369	0.00292	0.0795533	0.00158	0.000834778	3.3e-05	2.53329e-05	2.93e-05	-0.00157733	0	-0.00329918	1.68e-11	-0.00445826	3.22e-11	-0.00648712	0	-0.00238174	1.23e-11
FC15_TRA-62	2021-02-10	03:55:15	PM	0.742873	2.01e-05	-1.24948	0.00241	0.870901	9.23e-05	1.02559	0.000109	2.46295e-08	1.12e-08	4.98677e-08	3.23e-10	0.00109979	4.29e-07	0.0650621	0.000164	18.9723	0.0557	0.0085868	1.35e-05	0.282179	1.06e-05	1.46704	3.9e-05	1.88663	5.02e-05	8.56307	0.0294	0.126478	0.000518	0.0664587	0.000206	0.00123786	9.5e-06	6.6744e-05	2.8e-05	-0.00157453	0	-0.00329416	1.53e-11	-0.00446566	0	-0.00649226	4.65e-11	-0.00239665	0
FC16_TRA-69	2021-02-10	04:20:27	PM	0.742994	3.07e-05	-1.26391	0.00367	0.871144	0.000175	1.0253	0.000204	2.99062e-08	2.09e-08	4.0361e-08	6.79e-10	0.00112118	1.26e-05	0.0604615	0.000183	17.5516	0.0711	0.0086261	2.38e-05	0.282222	1.9e-05	1.46744	4.79e-05	1.88661	7.22e-05	5.39449	0.0509	0.0732988	0.00079	0.0418998	0.000111	0.00062495	1.41e-05	4.75129e-05	3.04e-05	-0.00155525	1.03e-11	-0.00327878	1.78e-11	-0.00444184	0	-0.00647878	2.37e-11	-0.00240961	0
FC17_TRA-76	2021-02-10	04:43:56	PM	0.743165	4.64e-05	-1.28437	0.00555	0.870843	0.000194	1.02568	0.000229	-5.15027e-08	2.2e-08	3.29128e-08	7.63e-10	0.00130842	2.46e-05	0.0631849	0.000344	18.559	0.115	0.00854967	2.57e-05	0.282168	1.9e-05	1.46751	5.93e-05	1.88665	7.98e-05	5.15382	0.0831	0.0734843	0.000967	0.0423595	0.000461	0.000491406	1.54e-05	-8.51549e-05	3.04e-05	-0.00153448	0	-0.0032615	0	-0.00444878	0	-0.00647642	0	-0.00239032	1.33e-11
FC18_TRA-83	2021-02-10	05:06:41	PM	0.742722	3.43e-05	-1.23142	0.00411	0.87107	0.000159	1.02541	0.000188	-2.00194e-09	2.45e-08	4.81064e-08	9.12e-10	0.00159872	2.22e-05	0.0844998	0.000239	24.6304	0.106	0.00864202	2.64e-05	0.282275	1.93e-05	1.46746	6.61e-05	1.88658	8.04e-05	5.61322	0.046	0.106676	0.000995	0.0613155	0.000284	0.000780007	1.88e-05	-3.67116e-05	3.81e-05	-0.0015335	0	-0.00325168	0	-0.00442621	5.94e-12	-0.00646341	0	-0.00238073	0
FC19_TRA-90	2021-02-10	05:32:47	PM	0.742793	1.86e-05	-1.23986	0.00223	0.871276	0.0002	1.02517	0.000235	1.6381e-08	1.2e-08	3.40558e-08	3.34e-10	0.000542257	1.21e-06	0.0300785	2.58e-05	8.77747	0.0161	0.00859396	1.24e-05	0.282159	1.19e-05	1.4672	4.46e-05	1.88668	5.06e-05	8.84248	0.0193	0.0603329	0.000141	0.0338264	6.9e-05	0.000876287	9.03e-06	4.01347e-05	3.17e-05	-0.00153126	0	-0.0032315	1.73e-11	-0.00442823	0	-0.00645164	3.79e-11	-0.00239753	1.29e-11
FC20_TRA-97	2021-02-10	05:50:40	PM	0.74267	1.88e-05	-1.22517	0.00226	0.871202	0.000174	1.02523	0.000203	3.60688e-08	1.2e-08	3.0456e-08	3.48e-10	0.000637469	1.28e-06	0.0352328	2.49e-05	10.2481	0.0183	0.00862646	1.27e-05	0.282168	1.24e-05	1.46725	3.85e-05	1.88675	4.85e-05	7.85695	0.0288	0.0628701	0.000241	0.0353506	6.27e-05	0.000697225	8.81e-06	8.42043e-05	2.83e-05	-0.00152303	0	-0.00323791	1.13e-11	-0.00442842	0	-0.00644427	2.33e-11	-0.00237928	0
FC21_TRA-104	2021-02-10	06:11:12	PM	0.742671	2.31e-05	-1.22525	0.00277	0.871239	0.000164	1.02521	0.000193	-1.88208e-08	1.28e-08	3.26236e-08	3.18e-10	0.000715059	2.04e-06	0.0403788	6.44e-05	11.7713	0.0306	0.00862635	1.43e-05	0.282176	1.36e-05	1.46729	4.44e-05	1.8866	5.71e-05	8.28442	0.0308	0.0747766	0.000236	0.041341	9.78e-05	0.000772986	7.21e-06	-3.93594e-05	3.12e-05	-0.00153477	8.48e-12	-0.00325182	6.76e-12	-0.00443899	2.44e-11	-0.0064486	0	-0.00241455	0
FC22_TRA-111	2021-02-10	06:33:49	PM	0.7426	2.3e-05	-1.21676	0.00275	0.871108	0.000191	1.02534	0.000226	-5.93999e-09	1.33e-08	3.03711e-08	3.59e-10	0.000582418	2.38e-06	0.0325443	0.000257	9.43677	0.075	0.00861773	1.22e-05	0.282155	1.58e-05	1.46725	5.29e-05	1.88682	5.62e-05	7.4559	0.0304	0.0549255	0.00029	0.0305804	9.41e-05	0.000655115	7.73e-06	-1.55869e-05	2.94e-05	-0.00151489	8.52e-12	-0.00325436	2.03e-11	-0.00442619	1.13e-11	-0.00644719	2.41e-11	-0.00238609	3.46e-12
FC24_TRA-125	2021-02-10	07:27:18	PM	0.742523	2.19e-05	-1.20763	0.00262	0.87126	0.000189	1.02519	0.000222	3.04205e-08	1.38e-08	3.2137e-08	3.76e-10	0.000642346	2.94e-07	0.0361821	0.000121	10.5242	0.0403	0.0086099	1.52e-05	0.282185	1.51e-05	1.46735	4.92e-05	1.88682	5.84e-05	7.05734	0.0299	0.0576472	0.000119	0.0320093	0.000147	0.000663072	7.44e-06	6.99505e-05	2.88e-05	-0.00150872	0	-0.00323678	1.96e-11	-0.00442219	1.19e-11	-0.00643044	3.98e-11	-0.00238867	1.74e-11
FC25_TRA-132	2021-02-10	07:45:56	PM	0.742251	1.77e-05	-1.17506	0.00212	0.871937	0.000112	1.02439	0.000131	-7.80452e-09	1.24e-08	3.66682e-08	5.26e-10	0.00104379	5.9e-06	0.0617088	0.000218	17.9715	0.0734	0.00863219	1.38e-05	0.282163	1.1e-05	1.46729	3.5e-05	1.88677	4.77e-05	8.68329	0.0325	0.121386	0.000347	0.0655727	0.000589	0.000917669	1.15e-05	-2.16913e-05	3.16e-05	-0.00149007	1.27e-11	-0.0032227	2.06e-11	-0.004403	0	-0.00641537	4.54e-11	-0.00236587	1.65e-11
FC26_TRA-139	2021-02-10	08:08:08	PM	0.742207	2.05e-05	-1.16973	0.00246	0.871533	0.000109	1.02486	0.000128	-1.29412e-08	1.22e-08	3.20947e-08	5.72e-10	0.00104639	7.17e-06	0.0613349	0.000267	17.9604	0.0861	0.00857604	1.37e-05	0.282177	1.21e-05	1.46729	3.66e-05	1.88683	4.91e-05	8.55175	0.0512	0.117985	0.000464	0.0660449	0.000847	0.000788579	1.15e-05	-4.16574e-05	3.1e-05	-0.00146601	0	-0.00321465	0	-0.00440473	0	-0.00641975	3.56e-11	-0.00235118	0
FC27_TRA-146	2021-02-10	08:26:44	PM	0.742345	2.4e-05	-1.18632	0.00287	0.871311	0.000109	1.02512	0.000128	-1.79994e-09	1.36e-08	5.14824e-08	3.86e-10	0.00110732	2.98e-06	0.065698	8.52e-05	19.2949	0.0457	0.00853306	1.65e-05	0.282171	1.48e-05	1.46735	4.73e-05	1.88673	5.92e-05	6.91984	0.0177	0.103224	0.000159	0.0544064	0.000263	0.00103985	8.65e-06	-4.40559e-06	2.84e-05	-0.00147361	0	-0.00323138	0	-0.00441694	3.07e-11	-0.00640609	0	-0.0023422	8.59e-12
FC28_TRA-153	2021-02-10	08:51:31	PM	0.742014	2.24e-05	-1.14665	0.00268	0.872029	9.62e-05	1.02428	0.000113	-3.64595e-08	1.13e-08	3.67329e-08	4.85e-10	0.00103309	6.21e-06	0.061308	0.000247	17.8279	0.0754	0.00863601	1.31e-05	0.282175	1.14e-05	1.46737	3.9e-05	1.88694	5.55e-05	8.72959	0.0228	0.121874	0.000368	0.0652076	0.000589	0.000936958	1.13e-05	-8.68375e-05	2.9e-05	-0.00143531	0	-0.00318068	2.19e-11	-0.00435741	0	-0.00637115	0	-0.00227142	8.16e-12
FC29_TRA-160	2021-02-10	09:15:32	PM	0.742085	1.97e-05	-1.15514	0.00236	0.872137	0.000108	1.02414	0.000126	8.90951e-09	1.26e-08	2.71704e-08	3.56e-10	0.0010412	1.66e-06	0.0618839	0.000265	17.9598	0.0838	0.00862004	1.61e-05	0.282197	1.26e-05	1.4674	3.91e-05	1.88689	5.71e-05	7.84179	0.0191	0.110499	0.000739	0.0577957	0.000227	0.000617688	8.47e-06	3.37217e-06	2.99e-05	-0.00142529	2.36e-12	-0.00313611	1.78e-11	-0.00433906	1.37e-11	-0.00636727	2.58e-11	-0.00228402	0
FC30_TRA-167	2021-02-10	09:35:45	PM	0.74201	2.21e-05	-1.14619	0.00264	0.872168	0.000141	1.02408	0.000164	1.73251e-09	1.21e-08	2.19902e-08	3.54e-10	0.000823381	1.18e-06	0.0491368	0.00027	14.1926	0.0817	0.00863948	1.48e-05	0.282199	1.37e-05	1.46736	4.89e-05	1.88677	5.5e-05	8.05705	0.0188	0.0898752	0.000659	0.0469028	0.000164	0.00050986	8.58e-06	-1.46293e-06	2.9e-05	-0.00139284	0	-0.00312834	0	-0.00432973	0	-0.00635512	0	-0.00225387	0
FC31_TRA-174	2021-02-10	09:54:43	PM	0.742149	2.12e-05	-1.1628	0.00253	0.871647	0.000109	1.02473	0.000128	-1.76493e-09	1.36e-08	2.64552e-08	3.48e-10	0.00105051	2.27e-07	0.0606283	0.000209	17.6956	0.0652	0.0085688	1.45e-05	0.282155	1.29e-05	1.4674	4.31e-05	1.88682	5.62e-05	7.74473	0.0115	0.106316	0.000364	0.0574218	8.47e-05	0.00059328	7.69e-06	-4.8909e-06	3.15e-05	-0.00139045	0	-0.00312591	6.52e-12	-0.00431149	0	-0.00635564	3.54e-11	-0.00225043	1.1e-11
FC32_TRA-181	2021-02-10	10:15:44	PM	0.742086	2.06e-05	-1.15531	0.00247	0.872357	0.000126	1.02389	0.000148	1.69439e-08	1.01e-08	2.41398e-08	3.09e-10	0.00079484	2.11e-07	0.0469829	0.000164	13.6794	0.0512	0.00858431	1.24e-05	0.282165	1.26e-05	1.46747	4.89e-05	1.88677	4.99e-05	9.38234	0.0167	0.0998954	0.000374	0.0527174	9.24e-05	0.000656776	8.66e-06	5.02342e-05	2.83e-05	-0.00142294	9.01e-12	-0.00313719	1.5e-11	-0.00432902	0	-0.0063507	1.06e-11	-0.00229176	8.16e-12
FC33_TRA-189	2021-02-10	10:38:26	PM	0.741936	2.24e-05	-1.1373	0.00269	0.872248	0.000121	1.02402	0.000142	-8.93812e-10	1.17e-08	2.81077e-08	3.38e-10	0.000883223	1.82e-06	0.0523232	0.000101	15.2061	0.0382	0.00860685	1.44e-05	0.282189	1.57e-05	1.46738	4.93e-05	1.88695	5.39e-05	8.37293	0.0129	0.099308	0.000217	0.0519283	0.000153	0.000679429	8.19e-06	-1.65167e-06	2.9e-05	-0.00140478	0	-0.00313308	0	-0.00431547	0	-0.00634449	0	-0.00225861	0
FC34_TRA-190	2021-02-10	10:40:43	PM	0.741983	2.08e-05	-1.14292	0.00249	0.87198	0.000107	1.02434	0.000126	-6.40752e-10	1.18e-08	4.05462e-08	3.64e-10	0.00110944	4.51e-07	0.0651152	0.000214	18.9336	0.0702	0.00861835	1.38e-05	0.282212	1.41e-05	1.46745	4.56e-05	1.88691	5.2e-05	8.04291	0.0137	0.118751	0.000421	0.0629799	0.00011	0.000945026	8.39e-06	-9.59064e-06	2.87e-05	-0.00139903	0	-0.00313041	1.83e-11	-0.00430362	1.96e-11	-0.00631473	3.98e-11	-0.00222481	0
FC35_TRA-191	2021-02-10	10:43:12	PM	0.742184	2.14e-05	-1.16697	0.00256	0.872516	0.000152	1.02369	0.000179	-2.25627e-09	1.17e-08	2.53331e-08	3.72e-10	0.000766412	3.15e-06	0.0440467	5.24e-05	12.809	0.0276	0.00861404	1.42e-05	0.282133	1.37e-05	1.46738	4.99e-05	1.88699	5.88e-05	8.11427	0.0174	0.0812283	0.000236	0.0441188	0.000249	0.000600022	8.51e-06	-1.87307e-06	2.85e-05	-0.00140963	0	-0.00311599	0	-0.00430888	0	-0.00634473	0	-0.00224321	7.14e-12
FC36_TRA-192	2021-02-10	10:45:12	PM	0.742067	2.49e-05	-1.15295	0.00298	0.872135	0.000127	1.02416	0.000149	4.09921e-09	1.23e-08	2.70809e-08	3.36e-10	0.000901841	1.93e-07	0.0521367	0.000162	15.2	0.0542	0.00859508	1.43e-05	0.282187	1.51e-05	1.46741	5.65e-05	1.88688	6.06e-05	7.89644	0.0215	0.0936627	0.000264	0.0502866	0.000137	0.000620054	7.49e-06	8.58994e-06	2.88e-05	-0.00137949	0	-0.00309278	2.11e-11	-0.00429689	0	-0.00634406	2e-11	-0.00222623	5.68e-12
FC37_TRA-193	2021-02-10	10:48:45	PM	0.7418	2.14e-05	-1.12102	0.00256	0.872455	0.00013	1.02378	0.000153	6.25262e-09	1.09e-08	2.07771e-08	3.51e-10	0.000744647	3.85e-07	0.0447177	0.000155	12.9918	0.0533	0.00861522	1.12e-05	0.282169	1.13e-05	1.46737	4.01e-05	1.88691	5.38e-05	9.68302	0.0525	0.0971382	0.000332	0.050945	0.000335	0.000580493	9.19e-06	1.55798e-05	3.17e-05	-0.00139902	0	-0.00310803	0	-0.00431562	2.05e-11	-0.00635461	4.13e-11	-0.00222088	0
Ples1	2021-02-10	01:23:25	PM	0.743552	2.06e-05	-1.33067	0.00246	0.86961	0.000653	1.02707	0.00077	-8.24581e-09	1.49e-08	1.29781e-07	5.64e-10	0.00015199	3.56e-07	0.010911	1.98e-05	3.16922	0.00884	0.00861727	1.55e-05	0.282508	1.34e-05	1.46698	3.17e-05	1.88657	5.42e-05	6.09592	0.0191	0.015074	6.61e-05	0.00650329	2.04e-05	0.00229254	1.46e-05	-1.49862e-05	2.67e-05	-0.00197009	6.53e-12	-0.00374518	0	-0.00487909	7.84e-12	-0.00689073	0	-0.00284525	9.74e-12
Ples2	2021-02-10	01:25:10	PM	0.743669	1.94e-05	-1.34462	0.00231	0.870228	0.00122	1.02673	0.00143	2.7926e-09	1.6e-08	6.86653e-08	1.56e-09	8.26158e-05	5.62e-07	0.00612719	3.3e-05	1.76894	0.011	0.00866278	1.52e-05	0.282485	1.35e-05	1.467	3.27e-05	1.88654	5.71e-05	6.57236	0.0567	0.00891977	4.19e-05	0.00375063	1.91e-05	0.00126358	2.16e-05	-6.19605e-06	2.92e-05	-0.00196063	0	-0.00372026	0	-0.00485303	0	-0.00687725	0	-0.00283932	0
Ples3	2021-02-10	01:31:04	PM	0.74353	2.08e-05	-1.32799	0.00249	0.873421	0.00154	1.02269	0.00176	-2.4824e-08	1.27e-08	6.64136e-08	3.91e-10	5.72744e-05	2.13e-07	0.00407418	1.36e-05	1.18352	0.00478	0.00866385	1.32e-05	0.282457	1.14e-05	1.4671	4.17e-05	1.88668	5.5e-05	8.18911	0.0786	0.00758669	9.52e-05	0.00331615	4.04e-05	0.00157841	1.59e-05	-5.07143e-05	3.03e-05	-0.00191841	9.52e-12	-0.00364693	1.74e-11	-0.00482432	0	-0.00683088	3.92e-11	-0.00278433	0
Ples4	2021-02-10	01:32:48	PM	0.743514	2.09e-05	-1.32605	0.0025	0.869241	0.00106	1.02763	0.00124	1.66469e-08	1.65e-08	1.06751e-07	1.55e-09	0.00010514	1.06e-06	0.00785874	0.000101	2.28417	0.0297	0.00863301	1.61e-05	0.282453	1.32e-05	1.46698	3.87e-05	1.88682	6.05e-05	6.01992	0.0158	0.0106796	0.000152	0.00449134	4.94e-05	0.00187202	2.97e-05	2.99572e-05	2.99e-05	-0.00187139	0	-0.00363306	1.85e-11	-0.00480438	1.54e-11	-0.0068153	2.33e-11	-0.00276225	7.12e-12
Ples5	2021-02-10	01:37:45	PM	0.743529	1.88e-05	-1.32787	0.00224	0.876111	0.00142	1.01978	0.00165	4.58322e-08	1.39e-08	3.01101e-08	1.56e-09	6.57185e-05	4.86e-07	0.00461631	2.34e-05	1.33169	0.00734	0.00865503	1.39e-05	0.282473	1.25e-05	1.46715	2.9e-05	1.88659	5.2e-05	7.44724	0.0672	0.00768131	3.66e-05	0.00338402	1.59e-05	0.000574551	2.69e-05	9.77859e-05	2.98e-05	-0.00188523	0	-0.00362177	2.46e-11	-0.00477447	6.58e-12	-0.00678148	3.59e-11	-0.00276559	0
Ples6	2021-02-10	01:50:33	PM	0.743383	2.15e-05	-1.31042	0.00257	0.876466	0.00182	1.01889	0.00209	-1.34157e-08	1.41e-08	4.90795e-08	4.48e-10	5.4918e-05	3.3e-07	0.0041745	1.16e-05	1.21134	0.00486	0.00867625	1.61e-05	0.282488	1.36e-05	1.467	3.15e-05	1.88669	5.28e-05	6.45842	0.0209	0.00611311	1.74e-05	0.00249949	9.93e-06	0.000916166	8.8e-06	-2.05112e-05	2.72e-05	-0.00181209	0	-0.00355628	0	-0.00468278	1.92e-11	-0.00672418	4.8e-11	-0.00264648	0
Ples7	2021-02-10	01:53:47	PM	0.7434	2.14e-05	-1.31242	0.00256	0.876733	0.00162	1.01869	0.0019	4.32772e-08	1.46e-08	5.33795e-08	4.41e-10	5.92496e-05	4.55e-07	0.0044898	1.87e-05	1.29224	0.00589	0.00866471	1.42e-05	0.282446	1.34e-05	1.46695	2.99e-05	1.88664	5.93e-05	6.50036	0.0178	0.00659181	1.48e-05	0.00271228	1.47e-05	0.00100149	8.28e-06	8.82627e-05	2.81e-05	-0.00180737	0	-0.00351936	0	-0.00467581	7.57e-12	-0.00672936	2.83e-11	-0.00262501	1.56e-11
Ples8	2021-02-10	01:56:12	PM	0.743355	1.92e-05	-1.30706	0.00229	0.873173	0.00159	1.02384	0.00187	-2.58583e-08	1.46e-08	5.22149e-08	5.46e-10	5.9059e-05	2.68e-07	0.00443144	2.08e-05	1.29231	0.00759	0.00864649	1.63e-05	0.282461	1.34e-05	1.467	3.29e-05	1.88665	5.95e-05	6.44442	0.0183	0.00648711	5e-05	0.00266087	1.31e-05	0.000981423	1.19e-05	-4.20202e-05	2.8e-05	-0.00178183	5.39e-12	-0.00350579	0	-0.0046907	3.73e-11	-0.00668612	0	-0.00264392	1.99e-11
Ples9	2021-02-10	01:58:59	PM	0.743266	1.63e-05	-1.29644	0.00195	0.870207	0.00088	1.02639	0.00103	1.35901e-08	1.08e-08	5.75115e-08	4.23e-10	7.15364e-05	6.95e-07	0.00538755	6.16e-05	1.56658	0.0182	0.00864172	1.07e-05	0.282442	9.65e-06	1.46701	2.74e-05	1.88676	4.27e-05	9.84642	0.00784	0.0119984	0.000137	0.0049822	4.77e-05	0.00164228	1.19e-05	4.12928e-05	3.18e-05	-0.00173441	5.77e-12	-0.00348876	0	-0.0046577	3.29e-11	-0.00668034	0	-0.00259681	1.65e-11
Ples10	2021-02-10	02:01:30	PM	0.743312	1.74e-05	-1.30192	0.00207	0.870457	0.00107	1.02601	0.00126	-1.0409e-08	9.96e-09	5.24258e-08	3.06e-10	5.59695e-05	2.3e-07	0.00451064	7.43e-06	1.3099	0.00305	0.00863975	1.01e-05	0.282453	1.16e-05	1.46697	2.89e-05	1.88671	4.49e-05	9.84014	0.0138	0.0100467	1.71e-05	0.00389466	1.57e-05	0.00150344	8.68e-06	-2.73427e-05	2.93e-05	-0.00173411	1.31e-11	-0.00347595	1.35e-11	-0.00463741	2.26e-11	-0.00666001	3.27e-11	-0.00258611	4.77e-12
Ples11	2021-02-10	02:23:59	PM	0.743097	1.76e-05	-1.27631	0.0021	0.87105	0.000815	1.02527	0.000964	2.16837e-08	1.03e-08	9.55678e-08	6.38e-10	8.02309e-05	3.5e-07	0.00640303	4.41e-05	1.85394	0.013	0.00864465	1.04e-05	0.282474	1.11e-05	1.46709	3.18e-05	1.8867	5.09e-05	9.60394	0.013	0.0139364	0.000106	0.00544171	2.78e-05	0.0026608	1.96e-05	6.35711e-05	2.96e-05	-0.00165186	0	-0.00341457	0	-0.00455574	0	-0.00660125	0	-0.00250669	0
Ples12_TRA-45	2021-02-10	02:50:24	PM	0.743069	1.64e-05	-1.27291	0.00196	0.870847	0.001	1.02537	0.00119	-7.40654e-09	9.48e-09	5.52428e-08	2.81e-10	5.82259e-05	3.68e-07	0.00473511	1.33e-05	1.37394	0.00479	0.00863921	1.11e-05	0.282469	1.11e-05	1.46707	3.2e-05	1.88658	4.43e-05	9.35471	0.0135	0.00998741	2.63e-05	0.00384014	2.41e-05	0.00150071	7.81e-06	-2.03823e-05	2.66e-05	-0.00160676	0	-0.00332851	2.43e-11	-0.00451337	6.72e-12	-0.00654903	1.2e-11	-0.00243496	0
Ples13_TRA-54	2021-02-10	03:31:16	PM	0.742961	1.67e-05	-1.26004	0.002	0.871771	0.000865	1.02471	0.00102	-3.20568e-09	9.54e-09	6.54966e-08	3.64e-10	7.05534e-05	2.91e-07	0.00550807	1.4e-05	1.60018	0.00458	0.00865809	1.02e-05	0.282448	1.08e-05	1.46705	3.12e-05	1.88657	4.49e-05	9.80365	0.019	0.012222	5.1e-05	0.00493838	2.53e-05	0.00186752	1.3e-05	-5.12796e-06	2.85e-05	-0.0015664	0	-0.00331567	0	-0.00447484	2.5e-11	-0.00651942	0	-0.00240401	0
Ples14_TRA-61	2021-02-10	03:52:55	PM	0.742918	1.81e-05	-1.25479	0.00216	0.870835	0.00102	1.02591	0.0012	-1.19225e-08	1.04e-08	6.57692e-08	4.06e-10	6.8407e-05	2.84e-07	0.00546121	1.6e-05	1.58941	0.00554	0.00865248	1.18e-05	0.28245	1.09e-05	1.46708	3.76e-05	1.88662	4.68e-05	9.06057	0.0141	0.0113025	4.29e-05	0.00440393	2.33e-05	0.00173782	1.14e-05	-2.50285e-05	2.81e-05	-0.0015527	0	-0.00326837	6.36e-12	-0.00443993	3.04e-11	-0.00648781	1.89e-11	-0.0023807	0
Ples15_TRA-68	2021-02-10	04:16:46	PM	0.742854	2.04e-05	-1.24721	0.00244	0.868767	0.00153	1.02825	0.00181	4.35136e-08	1.69e-08	7.0878e-08	5.59e-10	7.47818e-05	2.99e-07	0.00573789	1.54e-05	1.67645	0.00655	0.00860368	1.81e-05	0.282455	1.45e-05	1.46714	3.6e-05	1.88683	6.11e-05	5.63514	0.0162	0.00731729	3.61e-05	0.00297785	1.13e-05	0.00115537	1.05e-05	7.71982e-05	2.87e-05	-0.00154162	0	-0.00328343	0	-0.00444478	2.21e-11	-0.0064756	1.26e-11	-0.00238661	7.26e-12
Ples16_TRA-75	2021-02-10	04:41:08	PM	0.742833	2.38e-05	-1.24461	0.00284	0.869329	0.00131	1.02788	0.00155	-2.27907e-08	1.84e-08	7.08819e-08	5.04e-10	7.6573e-05	2.49e-07	0.00585274	1.08e-05	1.69321	0.00541	0.00867105	1.65e-05	0.282463	1.43e-05	1.4671	4.43e-05	1.88656	6.06e-05	5.82319	0.0278	0.00775572	4.89e-05	0.00314356	1.38e-05	0.00119457	1.17e-05	-3.41221e-05	3.21e-05	-0.00153647	0	-0.00325507	2.03e-11	-0.00443856	2.51e-11	-0.00647256	3.89e-11	-0.00239933	8.15e-12
Ples17_TRA-82	2021-02-10	05:04:05	PM	0.742958	2.37e-05	-1.25963	0.00283	0.868406	0.00217	1.02852	0.00253	-3.96267e-08	1.87e-08	5.48856e-08	5.9e-10	5.81336e-05	2.72e-07	0.00453904	1.3e-05	1.32391	0.00586	0.00867651	1.91e-05	0.282491	1.65e-05	1.46707	3.49e-05	1.88659	6.04e-05	5.12006	0.00612	0.00526339	1.27e-05	0.00209336	1.02e-05	0.000813449	8.57e-06	-6.00077e-05	2.86e-05	-0.00152717	0	-0.00324399	0	-0.00441451	0	-0.00645038	0	-0.00237758	1.01e-11
Ples18_TRA-89	2021-02-10	05:29:07	PM	0.742671	1.67e-05	-1.22533	0.002	0.871633	0.000821	1.02499	0.000965	-7.7937e-10	1.12e-08	6.10925e-08	3.6e-10	9.57658e-05	2.65e-07	0.0070346	2.06e-05	2.03839	0.00725	0.00865045	1.15e-05	0.282469	1.1e-05	1.46716	2.8e-05	1.88669	4.59e-05	8.08641	0.00962	0.0129213	5.09e-05	0.00549562	1.47e-05	0.00143455	9.12e-06	-1.41475e-06	2.73e-05	-0.00151977	0	-0.00322638	0	-0.00440427	0	-0.00642286	0	-0.00238048	0
Ples19_TRA-96	2021-02-10	05:48:12	PM	0.742688	1.72e-05	-1.22733	0.00206	0.872741	0.00133	1.02339	0.00155	1.71263e-08	1.36e-08	5.65942e-08	3.98e-10	5.30995e-05	2.54e-07	0.00434485	1.08e-05	1.26806	0.00444	0.00863804	1.24e-05	0.282451	1.03e-05	1.46723	2.32e-05	1.88672	4.6e-05	7.90224	0.0109	0.00783144	2.52e-05	0.00297468	1.68e-05	0.001298	9e-06	4.53369e-05	3.2e-05	-0.00153576	7.55e-12	-0.00322756	0	-0.00442952	1.43e-11	-0.00644157	2.83e-11	-0.00236255	3.28e-12
Ples20_TRA-103	2021-02-10	06:08:35	PM	0.742729	1.78e-05	-1.23225	0.00213	0.872189	0.00127	1.02423	0.00148	2.18066e-08	1.34e-08	5.7195e-08	3.86e-10	5.71141e-05	2.79e-07	0.00469997	7.5e-06	1.36515	0.00389	0.00862964	1.35e-05	0.282485	1.21e-05	1.46722	3.4e-05	1.88666	5.33e-05	7.81435	0.0239	0.00830052	2.03e-05	0.00316101	2.34e-05	0.00128917	8.29e-06	4.48613e-05	3.16e-05	-0.00155952	8.59e-12	-0.00327301	1.46e-11	-0.00445497	0	-0.00644437	0	-0.00241698	0
Ples21_TRA-110	2021-02-10	06:30:28	PM	0.742634	1.71e-05	-1.22084	0.00204	0.872544	0.00113	1.02378	0.00131	1.25912e-08	1.22e-08	5.79101e-08	3.89e-10	5.94736e-05	2.64e-07	0.00489845	1.23e-05	1.41955	0.00465	0.00864664	1.28e-05	0.282469	1.01e-05	1.46727	2.55e-05	1.88677	4.71e-05	8.04456	0.0127	0.00896792	2.7e-05	0.00338369	1.96e-05	0.00135265	8.92e-06	3.12234e-05	2.99e-05	-0.00155646	1.01e-11	-0.00328103	1.64e-11	-0.00444801	2.39e-12	-0.0064621	3.41e-11	-0.00240939	0
Ples22_TRA-117	2021-02-10	07:02:14	PM	0.742516	1.85e-05	-1.20673	0.00221	0.873398	0.00109	1.02292	0.00129	-7.72708e-09	1.27e-08	6.71563e-08	5.68e-10	6.93516e-05	2.93e-07	0.0055932	2.42e-05	1.6192	0.0077	0.00865932	1.19e-05	0.282479	1.25e-05	1.46716	3.89e-05	1.88656	5.04e-05	7.85076	0.0152	0.00999476	3.64e-05	0.0038519	2e-05	0.0015395	1.2e-05	-1.9589e-05	3e-05	-0.00153753	9.36e-12	-0.00325879	6.14e-12	-0.00445184	0	-0.00645995	0	-0.00240576	1.57e-11
Ples23_TRA-124	2021-02-10	07:22:09	PM	0.742543	1.71e-05	-1.20997	0.00205	0.874759	0.00117	1.02072	0.00135	-1.95225e-09	1.22e-08	5.61424e-08	3.21e-10	5.75289e-05	3.06e-07	0.00464429	6.83e-06	1.34489	0.0036	0.00865384	1.29e-05	0.282497	1.13e-05	1.46726	2.82e-05	1.88685	4.58e-05	7.88369	0.0148	0.00832389	2.29e-05	0.003221	2.15e-05	0.00128903	7.72e-06	-7.66487e-06	2.9e-05	-0.00153386	0	-0.00323483	0	-0.00442484	0	-0.00642691	0	-0.00236586	1.19e-11
Ples24_TRA-131	2021-02-10	07:42:46	PM	0.742525	2.14e-05	-1.20783	0.00256	0.868524	0.000967	1.02829	0.00114	-5.35577e-09	1.14e-08	7.13964e-08	4.14e-10	7.31935e-05	2.21e-07	0.00584208	1.63e-05	1.69744	0.00553	0.00863462	1.23e-05	0.282486	1.29e-05	1.4673	4.34e-05	1.88674	5.47e-05	8.28501	0.0133	0.0109704	3.17e-05	0.00426954	1.45e-05	0.00171381	9.75e-06	-1.74077e-05	2.86e-05	-0.00148756	0	-0.0032188	9.54e-12	-0.00442995	2.71e-11	-0.00642422	3.54e-11	-0.00237948	1.65e-11
Ples25_TRA-138	2021-02-10	08:03:46	PM	0.742408	1.88e-05	-1.19388	0.00225	0.872503	0.00131	1.02366	0.00153	-2.48066e-09	1.41e-08	5.76068e-08	3.78e-10	5.92268e-05	2.64e-07	0.0048295	9.07e-06	1.39976	0.004	0.00864592	1.3e-05	0.282459	1.2e-05	1.46735	3.15e-05	1.88701	5.1e-05	7.61324	0.0143	0.00834395	1.72e-05	0.0031883	1.84e-05	0.00127864	8.04e-06	-5.10523e-06	3.22e-05	-0.001494	1.2e-11	-0.00322204	0	-0.00441685	1.85e-11	-0.00644296	2.26e-11	-0.00236288	2.63e-12
Ples26_TRA-145	2021-02-10	08:23:59	PM	0.742346	2.25e-05	-1.18637	0.00269	0.871845	0.00116	1.02426	0.00135	-2.79507e-08	1.17e-08	6.33866e-08	4.61e-10	6.6383e-05	2.92e-07	0.00534466	2.35e-05	1.54467	0.00704	0.00866422	1.42e-05	0.282466	1.33e-05	1.4673	4.11e-05	1.88696	5.53e-05	7.70944	0.0208	0.00935369	3e-05	0.00362897	1.88e-05	0.00141759	9.02e-06	-5.63484e-05	2.69e-05	-0.00146779	6.74e-12	-0.00318722	0	-0.00438665	2.13e-11	-0.00642043	0	-0.00232458	0
Ples27_TRA-152	2021-02-10	08:46:07	PM	0.742339	1.92e-05	-1.18553	0.00229	0.868659	0.00104	1.02813	0.00124	-2.12741e-08	1.18e-08	6.9821e-08	5.13e-10	7.24939e-05	2.7e-07	0.0057554	1.96e-05	1.67041	0.00633	0.00862816	1.2e-05	0.282467	1.31e-05	1.46728	3.85e-05	1.88671	4.9e-05	7.96341	0.0113	0.0104231	4.09e-05	0.00406726	1.59e-05	0.00161299	1.24e-05	-4.96117e-05	2.83e-05	-0.00142923	8.91e-12	-0.00317497	1.99e-11	-0.0043879	2.4e-11	-0.00640613	0	-0.00230594	1.48e-11
Ples28_TRA-159	2021-02-10	09:13:16	PM	0.74216	1.76e-05	-1.16414	0.00211	0.87375	0.000884	1.02194	0.00103	-3.97613e-08	1.28e-08	6.57432e-08	4.5e-10	0.000106357	7.08e-07	0.00759203	5.91e-05	2.18782	0.0184	0.00867292	1.32e-05	0.2825	1.16e-05	1.46738	2.94e-05	1.88677	4.74e-05	7.87297	0.014	0.0135843	0.000106	0.00593016	3.61e-05	0.00149789	1.07e-05	-9.3508e-05	3.01e-05	-0.00142487	9.03e-12	-0.00315269	2.07e-11	-0.00433198	0	-0.00635711	3.65e-11	-0.00229861	0
Ples29_TRA-166	2021-02-10	09:33:13	PM	0.742139	1.84e-05	-1.16162	0.0022	0.871114	0.00123	1.02567	0.00143	2.8851e-08	1.36e-08	6.02134e-08	6.02e-10	7.641e-05	1.64e-06	0.00577123	0.000118	1.67654	0.0344	0.00863772	1.34e-05	0.282447	1.16e-05	1.46737	2.82e-05	1.88688	5.18e-05	7.5284	0.0145	0.00985219	0.000196	0.00406167	8.53e-05	0.00131045	1.22e-05	6.74261e-05	3.11e-05	-0.00141729	9.61e-12	-0.00313835	0	-0.00434611	6.67e-12	-0.00638546	2.8e-11	-0.00227233	0
Ples30_TRA-173	2021-02-10	09:52:12	PM	0.742184	1.65e-05	-1.16701	0.00197	0.869292	0.00141	1.02733	0.00168	-1.27732e-08	1.32e-08	5.44681e-08	3.47e-10	5.42156e-05	3.69e-07	0.004338	1.11e-05	1.26305	0.00418	0.00861119	1.28e-05	0.28245	1.08e-05	1.46738	2.92e-05	1.88688	4.61e-05	7.58	0.0139	0.00746581	3e-05	0.00290918	2.43e-05	0.001198	7.45e-06	-3.61772e-05	2.97e-05	-0.00138064	0	-0.00311664	1.08e-11	-0.00432649	0	-0.00636016	3.56e-11	-0.00226588	0
Ples31_TRA-180	2021-02-10	10:12:40	PM	0.742148	1.9e-05	-1.16265	0.00228	0.869491	0.00152	1.02691	0.00181	-5.69719e-09	1.29e-08	5.45636e-08	4.06e-10	5.5227e-05	3.57e-07	0.00449498	9.85e-06	1.3062	0.00408	0.00862801	1.34e-05	0.282469	1.22e-05	1.46734	3.47e-05	1.8869	5.15e-05	7.37078	0.0152	0.00752906	2.79e-05	0.00289974	2.39e-05	0.00117186	8.8e-06	-1.52709e-05	2.84e-05	-0.0014009	9.87e-12	-0.00314096	0	-0.00434058	0	-0.00634611	3.91e-11	-0.00226343	4.76e-12
Ples32_TRA-184	2021-02-10	10:24:33	PM	0.742116	2.15e-05	-1.15884	0.00258	0.875872	0.00136	1.01962	0.00158	-3.32311e-08	1.26e-08	5.75153e-08	4.08e-10	5.94912e-05	2.15e-07	0.00479313	1.12e-05	1.38553	0.00437	0.00869501	1.34e-05	0.282473	1.34e-05	1.46736	4.08e-05	1.88695	5.89e-05	7.37415	0.0212	0.00804698	1.76e-05	0.00308732	1.77e-05	0.00123873	8.44e-06	-5.7486e-05	2.84e-05	-0.00143	0	-0.00314927	0	-0.00431462	0	-0.00636516	0	-0.0022857	0
Ples33_TRA-185	2021-02-10	10:29:40	PM	0.742023	2.12e-05	-1.1477	0.00254	0.873709	0.0012	1.02263	0.0014	1.89608e-09	1.3e-08	6.39128e-08	5.62e-10	6.61933e-05	3.18e-07	0.00529037	2.42e-05	1.53415	0.00763	0.00863129	1.26e-05	0.28242	1.36e-05	1.46726	4.61e-05	1.88703	5.31e-05	7.47239	0.0213	0.00896439	3.05e-05	0.00350899	1.93e-05	0.00138818	1.11e-05	1.30765e-05	2.9e-05	-0.00144433	0	-0.00317488	1.83e-11	-0.00436169	0	-0.00638957	0	-0.00229557	0
Ples34_TRA-186	2021-02-10	10:31:56	PM	0.742003	2.13e-05	-1.14539	0.00255	0.871656	0.00107	1.02513	0.00126	5.95307e-08	1.34e-08	6.87045e-08	5.13e-10	7.12857e-05	2.79e-07	0.0055985	2.13e-05	1.62726	0.00708	0.00863265	1.22e-05	0.28247	1.36e-05	1.46721	3.96e-05	1.88696	5.43e-05	7.86332	0.0175	0.00999002	3.37e-05	0.00397675	1.78e-05	0.00156072	1.13e-05	0.000143468	3.19e-05	-0.00141301	0	-0.00316817	0	-0.00435385	0	-0.00638571	3.99e-11	-0.00230742	8.37e-12
Ples35_TRA-187	2021-02-10	10:33:51	PM	0.742069	2.09e-05	-1.15324	0.0025	0.876107	0.00122	1.01911	0.00142	-1.31941e-08	1.39e-08	6.87359e-08	5.5e-10	6.93852e-05	2.86e-07	0.00554133	2.57e-05	1.60345	0.00813	0.00867548	1.37e-05	0.282471	1.38e-05	1.4674	3.53e-05	1.88687	5.77e-05	7.51845	0.0248	0.00945165	3.1e-05	0.00369692	1.99e-05	0.00149326	1.02e-05	-3.20759e-05	3.14e-05	-0.00145078	0	-0.00317128	2.02e-11	-0.00433166	0	-0.0063711	0	-0.00228781	0
Ples36_TRA-188	2021-02-10	10:36:06	PM	0.742069	1.75e-05	-1.15328	0.0021	0.873215	0.00125	1.02287	0.00145	-8.25165e-08	1.43e-08	6.51228e-08	5.94e-10	6.63584e-05	2.66e-07	0.00537055	2.9e-05	1.54749	0.00875	0.00869319	1.33e-05	0.282466	1.24e-05	1.46741	3.09e-05	1.88706	4.74e-05	7.45786	0.0104	0.00911186	4.42e-05	0.0035179	1.51e-05	0.00141441	1.21e-05	-0.000176109	3.16e-05	-0.00140843	0	-0.00313846	1.11e-11	-0.00430675	1.91e-11	-0.00635632	0	-0.00228715	4.62e-12
[truncated: 14 more columns]

## Sheet: standards
session	Sample	analysis	time	176Lu/177Hf' mean	176Lu/177Hf' SE	176Hf/177Hf Corrected' mean	176Hf/177Hf Corrected' SE			Smith, T.M., Saylor, J.E., Lapen, T.J., Hatfield, K., and Sundell, K.E., 2022, Identifying sources of non-unique detrital age distributions through integrated provenance analysis: An example from the Paleozoic Central Colorado Trough: Geosphere, v. 18, https://doi.org/10.1130/GES02541.1
1	FC	FC1_3302	14:32:54	0.000587885	3.23e-06	0.282168	2.87e-05
1	FC	FC10_3364	17:12:11	0.0006377	3.03e-06	0.282231	3.21e-05
1	FC	FC10b_3365	17:14:33	0.000846726	6.43e-07	0.282253	3.19e-05
1	FC	FC11overwrite_3372	17:51:52	0.000820374	6.6e-07	0.282073	3.91e-05
1	FC	FC12_3379	18:10:47	0.000755869	6.53e-07	0.282194	4.13e-05
1	FC	FC13_3386	18:26:18	0.000707714	6.34e-07	0.282104	4.01e-05
1	FC	FC14_3393	18:38:51	0.000633552	2.48e-06	0.282239	3.54e-05
1	FC	FC15_3400	18:53:26	0.000481149	1.57e-06	0.28207	3.61e-05
1	FC	FC16_3407	19:06:21	0.000360915	1.25e-06	0.282222	3.29e-05
1	FC	FC17_3414	19:23:24	0.000342011	9.06e-07	0.282177	3.07e-05
1	FC	FC18_3421	19:35:52	0.000353121	8.08e-07	0.282145	3.18e-05
1	FC	FC19_3428	19:51:29	0.000621618	7.03e-07	0.282125	3.82e-05
1	FC	FC2_3305	14:35:38	0.000301791	3.15e-06	0.282199	2.88e-05
1	FC	FC20_3435	20:07:28	0.000609618	6.88e-07	0.282194	3.72e-05
1	FC	FC21_3449	20:20:32	0.000756542	1.22e-06	0.282229	3.62e-05
1	FC	FC22_3459	20:33:49	0.000598998	4.79e-07	0.282174	3.21e-05
1	FC	FC23_3459	20:55:27	0.000550136	5.41e-07	0.282164	3.19e-05
1	FC	FC25_3466	21:12:02	0.000608294	7.49e-07	0.282194	3.66e-05
1	FC	FC26_3473	21:28:51	0.000632758	7.96e-07	0.282197	3.39e-05
1	FC	FC28_3489	22:04:19	0.000625751	9.84e-07	0.282167	3.54e-05
1	FC	FC29_3496	22:21:17	0.000671726	1.6e-06	0.282079	3.26e-05
1	FC	FC3_3312	14:59:23	0.000842661	8.91e-07	0.282053	2.84e-05
1	FC	FC30_3509	22:47:36	0.000678215	9.52e-07	0.282146	3.83e-05
1	FC	FC31_3516	23:01:00	0.00066933	8.94e-07	0.282164	3.5e-05
1	FC	FC32_3523	23:13:56	0.000805891	2.07e-06	0.282128	3.97e-05
1	FC	FC33_3530	23:27:58	0.00157055	2.16e-05	0.28226	3.78e-05
1	FC	FC34_3539	23:47:01	0.000853752	3.49e-06	0.282141	3.84e-05
1	FC	FC35_3540	23:49:34	0.000591462	1.52e-05	0.282218	4.22e-05
1	FC	FC4_3320	15:22:37	0.000609692	1.18e-06	0.282189	3.11e-05
1	FC	FC6_3334	15:50:39	0.000474125	6.55e-07	0.282172	3.17e-05
1	FC	FC7_3343	16:12:57	0.00070625	1.53e-06	0.282273	6.52e-05
1	FC	FC8_3350	16:27:34	0.000811982	2.26e-06	0.282158	3.77e-05
1	FC	FC9_3357	16:43:44	0.000420431	1.28e-06	0.282205	3.98e-05
1	ples	ples_3307	14:41:13	0.000125815	5.18e-07	0.282473	3.08e-05
1	ples	ples1_3306	14:39:17	0.000104026	5.43e-07	0.282465	2.83e-05
1	ples	ples10_3349	16:25:13	8.02997e-05	4.85e-07	0.282431	3.08e-05
1	ples	ples11_3356	16:42:01	7.38306e-05	4.88e-07	0.282441	2.84e-05
1	ples	ples12_3363	17:08:26	9.07175e-05	1.17e-06	0.282463	2.82e-05
1	ples	ples13overwrite_3371	17:49:06	9.76177e-05	1.23e-06	0.282528	3.96e-05
1	ples	ples14_3378	18:08:09	0.000103859	6.52e-07	0.282567	3.74e-05
1	ples	ples15_3385	18:24:32	7.83447e-05	5.4e-07	0.282503	3.23e-05
1	ples	ples16_3392	18:36:21	0.000114483	9.63e-07	0.282527	3.35e-05
1	ples	ples17_339	18:49:26	8.60416e-05	5.34e-07	0.282481	4.01e-05
1	ples	ples18_3406	19:04:24	0.000112639	5.64e-07	0.282415	3.32e-05
1	ples	ples19_3413	19:20:37	5.80827e-05	5.86e-07	0.282488	3.29e-05
1	ples	ples20_3420	19:33:22	8.98419e-05	5.31e-07	0.28237	3.84e-05
1	ples	ples21_3427	19:46:35	6.42222e-05	1.6e-06	0.282449	3.04e-05
1	ples	ples22_3434	20:04:55	5.32373e-05	1.5e-06	0.282476	3.02e-05
1	ples	ples23_3441	20:17:55	6.7459e-05	4.86e-07	0.28245	3.5e-05
1	ples	ples24_3448	20:31:14	6.43418e-05	5.24e-07	0.282465	3.2e-05
1	ples	ples25b_3458	20:52:26	5.72134e-05	4.84e-07	0.282449	3.25e-05
1	ples	ples26_3465	21:10:01	7.05882e-05	6.52e-07	0.282436	3.33e-05
1	ples	ples27_3472	21:25:51	9.84856e-05	5.18e-07	0.282447	3.19e-05
1	ples	ples28_3479	21:42:31	7.65578e-05	1.59e-06	0.2825	4.56e-05
1	ples	ples29_3488	22:02:27	8.31694e-05	1.53e-06	0.282413	3.31e-05
1	ples	ples3_3308	14:43:38	0.000107637	4.77e-07	0.282454	2.81e-05
1	ples	ples30_3495	22:18:40	7.26275e-05	9.93e-07	0.282572	6.7e-05
1	ples	ples31_3501	22:31:21	7.90747e-05	1.04e-06	0.282477	3.16e-05
1	ples	ples32_3508	22:45:28	0.000105593	6.5e-07	0.282445	3.22e-05
1	ples	ples33_3515	22:58:34	9.2244e-05	7.53e-07	0.282482	3.66e-05
1	ples	ples34_3522	23:11:33	5.56024e-05	8.87e-07	0.282475	3.11e-05
1	ples	ples36_3534	23:36:45	5.16925e-05	3.91e-07	0.28247	2.6e-05
1	ples	ples37_3535	23:38:37	7.89616e-05	5e-07	0.28248	2.9e-05
1	ples	ples38_3536	23:40:21	5.63404e-05	5.46e-07	0.282438	3.01e-05
1	ples	ples39_3537	23:42:04	7.53167e-05	4.65e-07	0.282452	2.86e-05
1	ples	ples4_3309	14:49:55	0.000109257	4.24e-07	0.282518	3.07e-05
1	ples	ples40_3538	23:44:15	6.21082e-05	4.68e-07	0.282471	3.01e-05
1	ples	ples5_3311	14:53:31	8.65478e-05	4.78e-07	0.282388	2.79e-05
1	ples	ples6_3319	15:19:12	0.000112231	5.66e-07	0.282426	2.76e-05
1	ples	ples7_3327	15:33:30	0.00094037	3.5e-06	0.282114	3.53e-05
1	ples	ples8_3333	15:48:29	7.23781e-05	4.54e-07	0.282429	2.85e-05
1	ples	ples9B_3342	16:08:56	0.000118009	7.97e-07	0.282505	4.93e-05
2	FC	FC1_3546	12:05:58	0.00078866	1.08e-06	0.282189	2.93e-05
2	FC	FC10_3613	16:58:12	0.000474068	5.94e-07	0.282089	2.45e-05
2	FC	FC12_3628	17:44:42	0.000846786	2.88e-06	0.282151	2.73e-05
2	FC	FC13_3636	18:04:58	0.000849292	6.37e-07	0.282239	2.71e-05
2	FC	FC14_3637	18:06:58	0.000893662	5.75e-07	0.282186	2.62e-05
2	FC	FC15_3643	19:19:39	0.000901051	6.05e-07	0.282307	2.88e-05
2	FC	FC16_3644	19:23:05	0.000568083	5.88e-07	0.282083	2.96e-05
2	FC	FC17_3645	19:27:09	0.000906659	6.68e-07	0.282255	3.15e-05
2	FC	FC18_3652	19:58:28	0.000618799	5.22e-07	0.282105	3.11e-05
2	FC	FC19_3659	20:31:56	0.000783984	3.52e-06	0.282146	3.2e-05
2	FC	FC2_3547	12:09:55	0.000748292	1.8e-06	0.282102	2.86e-05
2	FC	FC20_3665	20:51:46	0.000684256	1.21e-06	0.282146	3.32e-05
2	FC	FC21_3676	21:26:34	0.000799444	4.51e-07	0.282217	2.63e-05
2	FC	FC22_3677	21:29:13	0.000496021	4.29e-07	0.282197	2.56e-05
2	FC	FC3_3560	13:06:44	0.000687412	1e-05	0.282136	3.42e-05
2	FC	FC4_3567	13:26:58	0.000587961	4.75e-07	0.282133	3.24e-05
2	FC	FC6_3582	14:38:19	0.000724738	1.96e-06	0.282264	2.45e-05
2	FC	FC7_3589	15:14:09	0.000418578	2.36e-06	0.282275	3.85e-05
2	FC	FC8maybe_3596	15:48:26	0.000753441	1.34e-06	0.282109	2.46e-05
2	FC	FC9_3606	16:22:12	0.000492994	1.34e-06	0.2822	3.19e-05
2	ples	ples1_3549	12:14:26	0.000146816	6.01e-07	0.282443	2.81e-05
2	ples	ples10_3581	14:34:37	0.000166206	4.14e-07	0.282494	2.47e-05
2	ples	ples11_3588	15:09:11	0.000131026	4.58e-07	0.282403	2.5e-05
2	ples	ples12_3595	15:43:13	8.63932e-05	4.4e-07	0.282481	2.74e-05
2	ples	ples13_3605	16:19:51	0.000107292	4.81e-07	0.282453	2.87e-05
2	ples	ples14_3612	16:54:53	7.26255e-05	4.76e-07	0.282477	2.78e-05
2	ples	ples15_3619	17:19:45	6.49789e-05	4.12e-07	0.28246	2.41e-05
2	ples	ples16_3620	17:21:59	0.000867943	7.01e-07	0.282202	2.69e-05
2	ples	ples16B_3627	17:42:11	6.48979e-05	4.69e-07	0.282505	2.87e-05
2	ples	ples17_3631	17:54:18	0.00017891	4.63e-07	0.282485	2.68e-05
2	ples	ples18_3632	17:56:09	0.00018339	4.47e-07	0.282486	2.51e-05
2	ples	ples19_3633	17:58:29	0.000173635	4.71e-07	0.28251	2.97e-05
2	ples	ples2_3550	12:30:31	9.41028e-05	5.71e-07	0.282556	3.32e-05
2	ples	ples20_3634	18:00:17	0.000179114	5.48e-07	0.282456	3.12e-05
2	ples	ples21_3635	18:02:52	0.000168113	4.75e-07	0.282548	3.02e-05
2	ples	ples22_3638	19:05:39	0.000111906	4.97e-07	0.282573	2.81e-05
2	ples	ples23_3639	19:07:50	0.000122446	5.53e-07	0.282428	2.56e-05
2	ples	ples24_3640	19:10:13	0.00010542	1.15e-06	0.28258	2.69e-05
2	ples	ples25_3641	19:12:16	0.000105458	1.02e-06	0.282438	2.54e-05
2	ples	ples26_3642	19:15:14	0.000101419	1.05e-06	0.282397	2.61e-05
2	ples	ples27_3651	19:55:30	9.24657e-05	9.58e-07	0.282492	2.56e-05
2	ples	ples28_3658	20:28:09	5.04073e-05	5.73e-07	0.282456	1.98e-05
2	ples	ples28B_3664	20:49:49	0.000104921	1.07e-06	0.282455	2.43e-05
2	ples	ples29_3671	21:13:27	0.000105251	1.2e-06	0.282456	2.42e-05
2	ples	ples3_3551	12:33:34	6.74702e-05	5.67e-07	0.28245	3.21e-05
2	ples	ples30_3672	21:15:33	0.000102103	9.17e-07	0.282461	2.59e-05
2	ples	ples31_3673	21:19:14	0.000103023	1.16e-06	0.282424	2.3e-05
2	ples	ples32_3674	21:21:37	0.000107517	1.23e-06	0.282484	2.5e-05
2	ples	ples33_3675	21:24:07	0.000104927	8.94e-07	0.282504	2.74e-05
2	ples	ples5_3552	12:37:29	0.000169359	5.5e-07	0.282567	3.25e-05
2	ples	ples6_3553	12:39:51	0.000189844	5.27e-07	0.282411	2.92e-05
2	ples	ples7_3559	13:03:48	0.000174471	4.88e-07	0.282454	3.18e-05
2	ples	ples8_3566	13:23:00	0.000148666	4.74e-07	0.282478	3.31e-05
2	ples	ples9_3573	13:43:07	0.000167337	5.08e-07	0.282423	3.06e-05
3	FC	FC1	01:17:58	0.000939911	2.9e-07	0.282125	1.4e-05
3	FC	FC2	01:19:59	0.00113099	2.64e-06	0.282169	1.38e-05
3	FC	FC1_1	01:20:29	0.000939911	2.9e-07	0.282158	1.4e-05
3	FC	FC2_2	01:21:07	0.00113099	2.64e-06	0.282187	1.37e-05
3	FC	FC1_2	01:21:33	0.000939911	2.9e-07	0.282172	1.4e-05
3	FC	FC3	01:27:17	0.000679833	2.16e-06	0.28214	1.41e-05
3	FC	FC4	01:28:59	0.000736959	3.42e-06	0.282175	1.46e-05
3	FC	FC5	01:34:40	0.00105822	9.46e-06	0.282195	1.56e-05
3	FC	FC6	02:04:53	0.000779646	2.04e-06	0.282181	1.18e-05
3	FC	FC7	02:07:19	0.000729021	1.39e-06	0.282147	1.08e-05
3	FC	FC8	02:09:24	0.00068106	9.43e-07	0.28214	1.07e-05
3	FC	FC9	02:12:34	0.00127424	1.35e-06	0.282256	1.05e-05
3	FC	FC10	02:19:48	0.0019185	2.52e-06	0.282304	1.03e-05
3	FC	FC11	02:33:26	0.000904101	3.26e-06	0.282183	9.73e-06
3	FC	FC12_TRA-46	02:58:03	0.0020834	4.74e-06	0.282315	1.09e-05
3	FC	FC13_TRA-48	03:06:16	0.0010654	3.24e-07	0.282206	1.2e-05
3	FC	FC14_TRA-55	03:34:30	0.00148453	2.68e-05	0.282224	1.69e-05
3	FC	FC15_TRA-62	03:55:15	0.00109979	4.29e-07	0.282179	1.06e-05
3	FC	FC16_TRA-69	04:20:27	0.00112118	1.26e-05	0.282222	1.9e-05
3	FC	FC17_TRA-76	04:43:56	0.00130842	2.46e-05	0.282168	1.9e-05
3	FC	FC18_TRA-83	05:06:41	0.00159872	2.22e-05	0.282275	1.93e-05
3	FC	FC19_TRA-90	05:32:47	0.000542257	1.21e-06	0.282159	1.19e-05
3	FC	FC20_TRA-97	05:50:40	0.000637469	1.28e-06	0.282168	1.24e-05
3	FC	FC21_TRA-104	06:11:12	0.000715059	2.04e-06	0.282176	1.36e-05
3	FC	FC22_TRA-111	06:33:49	0.000582418	2.38e-06	0.282155	1.58e-05
3	FC	FC24_TRA-125	07:27:18	0.000642346	2.94e-07	0.282185	1.51e-05
3	FC	FC25_TRA-132	07:45:56	0.00104379	5.9e-06	0.282163	1.1e-05
3	FC	FC26_TRA-139	08:08:08	0.00104639	7.17e-06	0.282177	1.21e-05
3	FC	FC27_TRA-146	08:26:44	0.00110732	2.98e-06	0.282171	1.48e-05
3	FC	FC28_TRA-153	08:51:31	0.00103309	6.21e-06	0.282175	1.14e-05
3	FC	FC29_TRA-160	09:15:32	0.0010412	1.66e-06	0.282197	1.26e-05
3	FC	FC30_TRA-167	09:35:45	0.000823381	1.18e-06	0.282199	1.37e-05
3	FC	FC31_TRA-174	09:54:43	0.00105051	2.27e-07	0.282155	1.29e-05
3	FC	FC32_TRA-181	10:15:44	0.00079484	2.11e-07	0.282165	1.26e-05
3	FC	FC33_TRA-189	10:38:26	0.000883223	1.82e-06	0.282189	1.57e-05
3	FC	FC34_TRA-190	10:40:43	0.00110944	4.51e-07	0.282212	1.41e-05
3	FC	FC35_TRA-191	10:43:12	0.000766412	3.15e-06	0.282133	1.37e-05
3	FC	FC36_TRA-192	10:45:12	0.000901841	1.93e-07	0.282187	1.51e-05
3	FC	FC37_TRA-193	10:48:45	0.000744647	3.85e-07	0.282169	1.13e-05
3	ples	Ples1	01:23:25	0.00015199	3.56e-07	0.282508	1.34e-05
3	ples	Ples2	01:25:10	8.26158e-05	5.62e-07	0.282485	1.35e-05
3	ples	Ples3	01:31:04	5.72744e-05	2.13e-07	0.282457	1.14e-05
3	ples	Ples4	01:32:48	0.00010514	1.06e-06	0.282453	1.32e-05
3	ples	Ples5	01:37:45	6.57185e-05	4.86e-07	0.282473	1.25e-05
3	ples	Ples6	01:50:33	5.4918e-05	3.3e-07	0.282488	1.36e-05
3	ples	Ples7	01:53:47	5.92496e-05	4.55e-07	0.282446	1.34e-05
3	ples	Ples8	01:56:12	5.9059e-05	2.68e-07	0.282461	1.34e-05
3	ples	Ples9	01:58:59	7.15364e-05	6.95e-07	0.282442	9.65e-06
3	ples	Ples10	02:01:30	5.59695e-05	2.3e-07	0.282453	1.16e-05
3	ples	Ples11	02:23:59	8.02309e-05	3.5e-07	0.282474	1.11e-05
3	ples	Ples12_TRA-45	02:50:24	5.82259e-05	3.68e-07	0.282469	1.11e-05
3	ples	Ples13_TRA-54	03:31:16	7.05534e-05	2.91e-07	0.282448	1.08e-05
3	ples	Ples14_TRA-61	03:52:55	6.8407e-05	2.84e-07	0.28245	1.09e-05
3	ples	Ples15_TRA-68	04:16:46	7.47818e-05	2.99e-07	0.282455	1.45e-05
3	ples	Ples16_TRA-75	04:41:08	7.6573e-05	2.49e-07	0.282463	1.43e-05
3	ples	Ples17_TRA-82	05:04:05	5.81336e-05	2.72e-07	0.282491	1.65e-05
3	ples	Ples18_TRA-89	05:29:07	9.57658e-05	2.65e-07	0.282469	1.1e-05
3	ples	Ples19_TRA-96	05:48:12	5.30995e-05	2.54e-07	0.282451	1.03e-05
3	ples	Ples20_TRA-103	06:08:35	5.71141e-05	2.79e-07	0.282485	1.21e-05
3	ples	Ples21_TRA-110	06:30:28	5.94736e-05	2.64e-07	0.282469	1.01e-05
3	ples	Ples22_TRA-117	07:02:14	6.93516e-05	2.93e-07	0.282479	1.25e-05
3	ples	Ples23_TRA-124	07:22:09	5.75289e-05	3.06e-07	0.282497	1.13e-05
3	ples	Ples24_TRA-131	07:42:46	7.31935e-05	2.21e-07	0.282486	1.29e-05
3	ples	Ples25_TRA-138	08:03:46	5.92268e-05	2.64e-07	0.282459	1.2e-05
3	ples	Ples26_TRA-145	08:23:59	6.6383e-05	2.92e-07	0.282466	1.33e-05
3	ples	Ples27_TRA-152	08:46:07	7.24939e-05	2.7e-07	0.282467	1.31e-05
3	ples	Ples28_TRA-159	09:13:16	0.000106357	7.08e-07	0.2825	1.16e-05
3	ples	Ples29_TRA-166	09:33:13	7.641e-05	1.64e-06	0.282447	1.16e-05
3	ples	Ples30_TRA-173	09:52:12	5.42156e-05	3.69e-07	0.28245	1.08e-05
3	ples	Ples31_TRA-180	10:12:40	5.5227e-05	3.57e-07	0.282469	1.22e-05
3	ples	Ples32_TRA-184	10:24:33	5.94912e-05	2.15e-07	0.282473	1.34e-05
3	ples	Ples33_TRA-185	10:29:40	6.61933e-05	3.18e-07	0.28242	1.36e-05
3	ples	Ples34_TRA-186	10:31:56	7.12857e-05	2.79e-07	0.28247	1.36e-05
3	ples	Ples35_TRA-187	10:33:51	6.93852e-05	2.86e-07	0.282471	1.38e-05
3	ples	Ples36_TRA-188	10:36:06	6.63584e-05	2.66e-07	0.282466	1.24e-05

## Sheet: conc Cambrian DZ eHf
Sample	analysis	176Lu/177Hf' mean	176Lu/177Hf' SE	176Hf/177Hf Corrected' mean	176Hf/177Hf Corrected' SE	U-Pb age	2SD	εHf(t, CHUR)	SD	2SD	T(CHUR) Ma	T(DMM) Ma
1SMBT4	1SMBT4_006_3520	0.00066624	1.51e-06	0.282448	4.29e-05	471.35	42.4178	-1.60718	2.44951	4.89902	544.49	1083.18		0.441576														Smith, T.M., Saylor, J.E., Lapen, T.J., Hatfield, K., and Sundell, K.E., 2022, Identifying sources of non-unique detrital age distributions through integrated provenance analysis: An example from the Paleozoic Central Colorado Trough: Geosphere, v. 18, https://doi.org/10.1130/GES02541.1
1SMBT4	1SMBT4_012_3528	0.000713396	1.53e-06	0.282534	3.85e-05	521.145	35.7058	2.49033	2.14629	4.29258	407.571	970.093
1SMST9	1SMST9_001_3412	0.000932878	1.7e-06	0.282411	4.77e-05	522.159	38.849	-1.91819	2.53492	5.06984	610.061	1141.27		3.26608
1SMST9	1SMST9_002_3415	0.000748359	4.95e-06	0.282475	4.22e-05	521.235	46.5702	0.387841	2.51219	5.02437	503.544	1050.29
1SMST9	1SMST9_003_3416	0.00101457	2.25e-06	0.282624	6.24e-05	520.961	42.0779	5.57196	3.12384	6.24768	264.154	855.538
1SMST9	1SMST9_004_3417	0.000882292	2.42e-06	0.282673	4.23e-05	515.773	35.9363	7.24266	2.28148	4.56296	183.041	786.282
1SMST9	1SMST9_005_3418	0.00134409	6.84e-06	0.282445	3.34e-05	531.362	40.2435	-0.637697	2.04436	4.08872	560.968	1106.25
1SMST9	1SMST9_006_3419	0.001355	6.59e-06	0.282713	7.4e-05	514.605	36.5512	8.46816	3.40279	6.80559	119.631	741.198
1SMST9	1SMST9_007_3422	0.00138536	2.38e-06	0.282596	4.88e-05	531.43	42.8768	4.69882	2.64912	5.29824	312.497	901.191
1SMST9	1SMST9_008_3423	0.0037775	9.13e-06	0.282568	5.68e-05	525.42	38.6412	2.73624	2.77408	5.54816	387.791	1001.39
1SMST9	1SMST9_009_3424	0.00153576	1.05e-06	0.282501	4.79e-05	505.18	36.2916	0.716937	2.47197	4.94394	471.658	1035.08
1SMST9	1SMST9_010_3425	0.000749973	9.52e-07	0.282606	4.4e-05	520.347	48.3265	4.99861	2.61792	5.23584	291.877	874.573
1SMST9	1SMST9_011_3426	0.00143154	1.92e-06	0.282475	4.92e-05	528.718	39.9139	0.304926	2.59814	5.19628	514.517	1069.03
1SMST9	1SMST9_012_3429	0.000986561	2.02e-06	0.282538	4.42e-05	524.054	42.3141	2.59719	2.48532	4.97064	404.615	971.57
1SMST9	1SMST9_013_3430	0.00105139	6.91e-07	0.282604	3.94e-05	503.69	35.5952	4.4652	2.16815	4.3363	297.682	883.88
1SMST9	1SMST9_014_3431	0.00132602	1.01e-06	0.282565	3.47e-05	508.442	38.0324	3.09854	2.04752	4.09504	364.368	943.219
1SMST9	1SMST9_015_3432	0.00154054	3.99e-06	0.282715	3.95e-05	517.197	59.217	8.53814	2.66459	5.32918	116.655	741.729
1SMST9	1SMST9_016_3433	0.00505556	3.08e-06	0.28266	5.11e-05	517.701	37.6702	5.40729	2.5254	5.05081	233.108	898.582
1SMST9	1SMST9_017_3436	0.00434915	9.23e-06	0.282681	4.93e-05	529.656	48.2646	6.59538	2.68224	5.36447	190.829	851.076
1SMST9	1SMST9_018_3437	0.0010902	1.12e-06	0.282648	4.91e-05	509.012	38.7444	6.13605	2.57901	5.15801	225.406	824.585
1SMST9	1SMST9_019_3438	0.000635845	1.11e-06	0.282453	3.92e-05	518.814	37.913	-0.401814	2.22156	4.44313	537.074	1076.6
1SMST9	1SMST9_020_3439	0.00158903	7.31e-06	0.282551	4.97e-05	514.273	48.9098	2.66348	2.79998	5.59997	389.448	967.902
1SMST9	1SMST9_021_3440	0.00119173	1.61e-06	0.282608	4.09e-05	515.3	44.7019	4.82876	2.41475	4.82949	291.572	880.933
1SMST9	1SMST9_022_3443	0.00114765	2.54e-05	0.282564	3.84e-05	517.01	34.5923	3.33023	2.09075	4.1815	363.027	939.458
1SMST9	1SMST9_023_3444	0.00203125	9.6e-07	0.28256	3.75e-05	520.084	35.1578	2.95708	2.06834	4.13669	379.555	966.462
1SMST9	1SMST9_024_3445	0.00160191	3.54e-06	0.282497	3.64e-05	492.702	37.3705	0.279689	2.08425	4.16849	479.597	1042.62
1SMST9	1SMST9_025_3446	0.000901422	4.14e-06	0.282389	4.78e-05	510.494	43.0459	-2.91941	2.62881	5.25762	644.123	1169.12
1SMST9	1SMST9_026_3447	0.000963548	1.28e-05	0.282631	4.25e-05	506.127	43.3409	5.53185	2.44022	4.88045	251.492	844.271
1SMST9	1SMST9_027_3450	0.00121714	8.58e-07	0.282443	4.63e-05	518.48	35.0294	-0.945668	2.39599	4.79198	562.217	1105.5
1SMST9	1SMST9_028_3451	0.00106586	8.16e-07	0.28252	4.14e-05	508.9	37.9254	1.61738	2.28904	4.57808	434.346	997.368
1SMST9	1SMST9_030_3453	0.00286654	2.64e-06	0.282652	5.11e-05	515.572	37.1067	5.80119	2.56921	5.13842	231.985	858.554
1SMST9	1SMST9_032_3460	0.0010544	4.49e-06	0.282605	4.46e-05	499.496	33.3132	4.42971	2.2998	4.59959	295.091	881.778
1SMST9	1SMST9_033_3461	0.00164081	1.55e-06	0.282571	4.72e-05	506.985	34.1982	3.20192	2.39982	4.79964	356.624	941.558
2SMBT4	2SMBT4_001_3485	0.000750066	4.11e-06	0.282477	6.4e-05	478.775	32.255	-0.476039	2.96981	5.93962	500.501	1047.79		2.3363
2SMBT4	2SMBT4_003_3484	0.000513889	2.13e-06	0.282464	4.35e-05	499.149	32.7392	-0.411573	2.26149	4.52299	517.792	1058.9
2SMBT4	2SMBT4_006_3491	0.00105928	1.99e-06	0.282587	3.57e-05	500.711	31.8101	3.8031	1.95366	3.90732	325.247	906.841
2SMBT4	2SMBT4_007_3492	0.00154062	4.97e-06	0.282584	6.35e-05	513.249	45.7422	3.80515	3.22417	6.44834	335.096	922.241
2SMBT4	2SMBT4_008_3493	0.000719148	3.95e-06	0.282533	4.12e-05	538.717	42.9644	2.84229	2.39978	4.79955	409.097	971.443
2SMBT4	2SMBT4_010_3497	0.000641017	3.02e-06	0.282449	4.03e-05	526.544	33.6076	-0.364545	2.1643	4.32861	543.11	1081.69
2SMBT4	2SMBT4_011_3498	0.00148306	1.19e-06	0.282526	5.07e-05	513.972	37.6769	1.79752	2.60226	5.20452	430.04	999.888
2SMBT4	2SMBT4_013_3500	0.000792935	1.49e-06	0.282582	4.77e-05	508.07	36.3964	3.8758	2.48517	4.97035	330.728	907.45
2SMBT4	2SMBT4_015_3504	0.00159918	7.69e-07	0.282575	3.04e-05	528.001	38.6558	3.80655	1.90227	3.80454	349.511	935.047
2SMBT4	2SMBT4_018_3507	0.00083655	8.96e-06	0.282376	5.03e-05	529.387	51.1589	-2.9765	2.89338	5.78677	665.304	1185.85
2SMBT4	2SMBT4_019_3510	0.00115774	1.96e-06	0.282542	4.21e-05	508.547	31.1731	2.3363	2.16439	4.32878	400.515	970.665
2SMST112	2SMST112_001_3366	0.00117381	1.85e-05	0.28254	5.66e-05	457.3	31.6356	1.15871	2.6758	5.35159	403.664	973.509		4.92318
2SMST112	2SMST112_003_3368	0.00123058	9.79e-06	0.28249	6.78e-05	526.349	61.5801	0.887233	3.72473	7.44946	485.271	1041.94
2SMST112	2SMST112_004overwrite_3369	0.000742954	1.71e-06	0.282462	3.53e-05	517.546	41.1316	-0.137268	2.15097	4.30194	523.805	1067.05
2SMST112	2SMST112_005overwrite_3370	0.00223173	3.17e-06	0.282684	6.04e-05	544.755	41.4335	7.79139	3.00528	6.01055	171.501	798.269
2SMST112	2SMST112_006_3373	0.00497199	1.64e-06	0.28272	4.61e-05	529.557	41.1594	7.78344	2.41874	4.83749	120.728	806.042
2SMST112	2SMST112_007_3374	0.000980559	2.79e-06	0.282622	4.71e-05	513.293	43.2154	5.33881	2.60729	5.21459	267.473	857.776
2SMST112	2SMST112_008_3375	0.0010317	2.56e-06	0.282538	5.15e-05	522.559	40.5917	2.55251	2.70459	5.40918	405.01	972.553
2SMST112	2SMST112_009_3376	0.000688058	3.03e-06	0.282541	4.24e-05	510.792	37.8445	2.52654	2.33073	4.66146	395.628	959.813
2SMST112	2SMST112_010_3377	0.00179868	1.22e-05	0.283339	0.000508	527.693	43.5452	30.7612	18.9057	37.8114	-941.306	-125.26
2SMST112	2SMST112_011_3380	0.000921467	2.22e-06	0.28259	6.36e-05	514.825	38.4504	4.25594	3.08949	6.17897	319.317	899.879
2SMST112	2SMST112_012_3381	0.00218881	1.49e-06	0.282689	4.22e-05	514.605	40.2058	7.32998	2.33692	4.67384	163.788	791.209
2SMST112	2SMST112_013_3382	0.00163607	1.2e-05	0.282595	4.57e-05	513.394	39.6665	4.16161	2.45612	4.91225	317.94	909.523
2SMST112	2SMST112_014_3383	0.00196978	2.91e-06	0.28262	4.23e-05	518.652	36.8614	5.05104	2.27445	4.54891	278.849	882.465
2SMST112	2SMST112_015_3384	0.00196978	2.91e-06	0.28262	4.23e-05	519.533	37.7795	5.06965	2.29388	4.58776	278.849	882.465
2SMST112	2SMST112_016_3387	0.00186339	6.66e-06	0.282639	4.81e-05	518.248	33.7274	5.74471	2.41325	4.82651	246.343	853.968
2SMST112	2SMST112_017_3388	0.0019271	7.05e-07	0.282493	3.82e-05	521.532	38.6693	0.633915	2.16991	4.33983	491.537	1057.27
2SMST112	2SMST112_019_3390	0.00109104	5.61e-06	0.282651	3.57e-05	510.517	53.2033	6.2782	2.41544	4.83089	220.325	820.39
2SMST112	2SMST112_020_3391	0.00180921	5.26e-06	0.282581	5.55e-05	530.432	46.9663	3.9863	2.95884	5.91767	342.271	932.281
2SMST112	2SMST112_021_3394	0.00426639	2e-06	0.28272	5.57e-05	532.361	40.8296	8.09014	2.77139	5.54278	117.645	790.051
2SMST112	2SMST112_022_3395	0.00191224	4.83e-06	0.282666	5.95e-05	536.804	39.7064	7.10137	2.94416	5.88833	200.096	816.606
2SMST112	2SMST112_023_3396	0.000960989	1.95e-05	0.282616	3.66e-05	524.861	41.8233	5.40644	2.19336	4.38671	276.13	864.658
2SMST112	2SMST112_024_3397	0.00153049	4.62e-06	0.282518	3.97e-05	536.891	44.9273	1.9959	2.36482	4.72964	443.595	1011.8
2SMST112	2SMST112_025_3398	0.0022645	1.79e-06	0.282682	4.5e-05	524.8	39.4138	7.26259	2.41739	4.83479	176.451	802.884
2SMST112	2SMST112_026_3401	0.00412513	3.84e-05	0.282631	3.45e-05	530.092	40.0014	4.92318	1.98036	3.96073	279.302	918.983
2SMST112	2SMST112_029_3404	0.00288052	1.43e-05	0.282582	0.000416	549.865	46.6148	4.03592	15.6764	31.3527	352.782	957.883
2SMST112	2SMST112_030_3405	0.000605248	8.54e-07	0.282565	4.49e-05	508.094	38.9818	3.33781	2.44801	4.89602	356.273	925.932
2SMST112	2SMST112_032_3409	0.00134507	1.42e-06	0.282589	4.05e-05	513.302	38.5803	4.06414	2.26407	4.52814	324.159	910.228
2SMST112	2SMST112_033_3410	0.000988622	1.75e-06	0.282624	4.17e-05	515.384	39.9901	5.45594	2.34638	4.69277	264.107	855.108
2SMST112	2SMST112_034_3411	0.00308085	1.82e-05	0.282561	6.78e-05	425.348	43.6625	0.680484	3.2769	6.5538	391.864	993.188
4SMST778	4SMST778_001_3313	0.00277554	7.12e-06	0.282672	4.76e-05	525.087	43.8368	6.73632	2.5831	5.16619	196.687	828.061		3.14096
4SMST778	4SMST778_002_3314	0.000746224	5.83e-07	0.282616	3.31e-05	511.357	39.634	5.16025	2.0413	4.08259	275.465	860.895
4SMST778	4SMST778_007_3322	0.00251734	1.31e-06	0.282552	3.91e-05	514.105	35.2034	2.37125	2.11413	4.22825	399.668	990.591
4SMST778	4SMST778_008_3323	0.000404782	4.9e-06	0.282474	2.9e-05	521.067	64.2996	0.467675	2.4488	4.8976	499.955	1042.57
4SMST778	4SMST778_009_3324	0.00122002	1.58e-06	0.282504	3.44e-05	513.027	36.1093	1.07385	1.99749	3.99497	463.307	1023.59
4SMST778	4SMST778_012_3329	0.00255494	1.27e-06	0.282749	4.9e-05	520.47	43.3406	9.47191	2.63341	5.26683	61.3853	713.212
4SMST778	4SMST778_013_3330	0.00188705	1.18e-05	0.282576	4.73e-05	534.876	37.6261	3.85829	2.46313	4.92627	352.338	941.789
4SMST778	4SMST778_014_3331	0.000819765	4.62e-06	0.282544	4.79e-05	535.73	46.6688	3.14096	2.71476	5.42952	392.021	958.711
4SMST778	4SMST778_017_3337	0.0015376	2.01e-06	0.282547	3.65e-05	534.158	50.5531	2.95095	2.37396	4.74791	396.123	972.649
4SMST778	4SMST778_019_3339	0.00264322	1.61e-06	0.282716	5.63e-05	511.848	38.3978	8.08771	2.78645	5.57291	118.907	761.967
4SMST778	4SMST778_020_3340	0.00172122	1.76e-05	0.282446	0.000124	541.573	44.4255	-0.525184	5.32309	10.6462	566.239	1115.96
4SMST778	4SMST778_021_3344	0.000914313	3.75e-06	0.282573	4.02e-05	539.957	42.4512	4.2051	2.34786	4.69572	346.933	922.677
4SMST778	4SMST778_022_3345	0.00110384	1.71e-05	0.282662	4.45e-05	518.539	51.096	6.82321	2.67231	5.34463	203.009	806.245
4SMST778	4SMST778_023_3346	0.00226694	1.54e-05	0.282643	5.44e-05	503.695	42.2912	5.43587	2.79997	5.59993	243.042	857.73
4SMST778	4SMST778_024_3347	0.000930579	3.32e-06	0.282439	5.03e-05	433.658	51.4395	-2.85375	2.89846	5.79692	564.612	1103.51
4SMST778	4SMST778_025_3348	0.00127632	1e-05	0.282622	6.13e-05	541.487	40.8791	5.87146	3.04608	6.09215	268.76	863.337
4SMST778	4SMST778_027_3352	0.000993179	2.85e-06	0.282477	4.05e-05	587.096	52.7728	1.80841	2.58282	5.16565	504.052	1054.14
4SMST778	4SMST778_028_3353	0.00170824	6.16e-06	0.282643	4.9e-05	521.022	34.8878	6.00235	2.47376	4.94752	238.292	844.866
4SMST778	4SMST778_029_3354	0.00121913	4.47e-06	0.282525	3.71e-05	518.721	38.7404	1.93715	2.14805	4.29611	429.01	995.168
4SMST778	4SMST778_032_3359	0.00107433	6.63e-07	0.282526	3.38e-05	528.826	42.9366	2.2525	2.12923	4.25846	424.984	989.73
4SMST778	4SMST778_035_3362	0.000658736	3.54e-06	0.282514	3.66e-05	541.863	52.0027	2.27814	2.43801	4.87601	438.193	994.753

## Sheet: conc Cambrian igneous eHf
session	Sample	analyses	176Lu/177Hf' mean	176Lu/177Hf' SE	176Hf/177Hf Corrected' mean	176Hf/177Hf Corrected' SE	U-Pb age	2SD	ε Hf(t, CHUR)	SD	2SD	T(CHUR) Ma	T(DMM) Ma
2	BFB1	BFB1-001_3575	0.000454866	2.86e-06	0.282522	4.11e-05	538.229	34.6197	2.5437	2.21974	4.43948	423.165	979.394		3.01376							Smith, T.M., Saylor, J.E., Lapen, T.J., Hatfield, K., and Sundell, K.E., 2022, Identifying sources of non-unique detrital age distributions through integrated provenance analysis: An example from the Paleozoic Central Colorado Trough: Geosphere, v. 18, https://doi.org/10.1130/GES02541.1
2	BFB1	BFB1-002_3576	0.000750621	8.98e-07	0.282567	2.31e-05	501.845	28.1766	3.219	1.43515	2.87029	354.767	926.786
2	BFB1	BFB1-003_3577	0.000740026	3.79e-07	0.282566	1.72e-05	518.232	34.761	3.56783	1.37164	2.74328	355.301	927.075
2	BFB1	BFB1-019_3593	0.00261117	3.13e-06	0.282608	2.21e-05	514.414	37.7005	4.30694	1.56055	3.1211	305.748	914.888
2	BFB1	BFB1-022_3594	0.00510702	2.23e-05	0.282755	1.7e-05	512.012	29.5916	8.64462	1.14926	2.29853	55.4262	755.896
2	BFB1	BFB1-024_3583	0.000763118	1.32e-06	0.282571	1.66e-05	519.571	28.5633	3.76625	1.21322	2.42645	347.447	920.892
2	BFB1	BFB1-026_3580	0.000848065	1.58e-06	0.282554	1.13e-05	520.423	30.3123	3.14662	1.062	2.12401	376.284	946.06
2	BFB1	BFB1-027_3591	0.00499107	6.12e-06	0.282708	2.72e-05	510.931	29.0622	6.98175	1.5141	3.02819	143.966	825.218
2	BFB1	BFB1-030_3592	0.0024835	2.46e-06	0.282611	2.31e-05	508.131	32.2409	4.32623	1.48608	2.97215	299.362	907.571
2	BFB1	BFB1-035_3584	0.0010451	1.71e-06	0.282568	1.04e-05	502.63	29.7628	3.18041	1.01389	2.02778	356.004	932.124
2	BFB1	BFB1-038_3585	0.000733324	2.88e-07	0.282591	1.06e-05	481.363	27.5657	3.61813	0.979693	1.95939	316.037	894.381
2	BFB1	BFB1-041_3586	0.000846537	3.64e-06	0.28259	1.04e-05	503.434	31.7287	4.05018	1.05954	2.11908	317.776	897.492
2	BFB1	BFB1-046_3587	0.000686902	9.5e-07	0.282565	9.49e-06	503.327	31.6853	3.20553	1.0316	2.06319	357.154	927.844
3	BFB1	BFB1.2_1_TRA-40	0.00116728	7.88e-06	0.282505	1.46e-05	527.539	26.2971	1.44141	1.08072	2.16145	460.92	1020.85
3	BFB1	BFB1.2_10_TRA-56	0.00132445	3.02e-06	0.282525	1.46e-05	513.974	22.6231	1.81985	1.00226	2.00452	429.417	997.042
3	BFB1	BFB1.2_11_TRA-57	0.00127315	9.2e-06	0.282579	2.36e-05	522.144	25.1968	3.90423	1.37294	2.74587	340.894	922.997
3	BFB1	BFB1.2_12_TRA-58	0.00154703	1.13e-05	0.282544	1.54e-05	520.333	21.8671	2.54906	1.00516	2.01031	401.049	976.863
3	BFB1	BFB1.2_13_TRA-59	0.00103916	3.76e-06	0.282536	1.64e-05	511.626	28.7798	2.24502	1.20364	2.40728	408.205	975.31
3	BFB1	BFB1.2_14_TRA-60	0.00126907	1.22e-06	0.282543	1.25e-05	509.206	25.3624	2.3731	0.989154	1.97831	399.094	971.123
3	BFB1	BFB1.2_15_TRA-63	0.000846122	2.09e-06	0.282497	1.47e-05	509.155	24.5165	0.879412	1.055	2.11	468.903	1022.9
3	BFB1	BFB1.2_16_TRA-64	0.00092817	8.81e-07	0.282537	1.18e-05	513.382	29.0275	2.3458	1.05041	2.10081	405.684	971.612
3	BFB1	BFB1.2_2_TRA-41	0.000533058	2.41e-06	0.282528	1.39e-05	502.817	26.6577	1.9429	1.07885	2.15769	414.679	973.439
3	BFB1	BFB1.2_3_TRA-42	0.0011579	6.02e-06	0.282528	1.63e-05	508.882	16.7808	1.85142	0.93629	1.87258	423.29	989.538
3	BFB1	BFB1.2_4_TRA-43	0.000701904	2.75e-07	0.282522	1.32e-05	516.845	21.952	1.99274	0.949346	1.89869	426.007	985.241
3	BFB1	BFB1.2_5_TRA-44	0.000731545	4.32e-06	0.282557	1.47e-05	515.346	24.7617	3.164	1.06084	2.12169	370.909	939.912
3	BFB1	BFB1.2_6_TRA-49	0.000790726	3.66e-06	0.282511	1.4e-05	515.739	39.504	1.54506	1.3585	2.71701	445.13	1002.38
3	BFB1	BFB1.2_7_TRA-50	0.000875825	9.92e-06	0.282552	1.36e-05	512.912	42.0498	2.88089	1.39321	2.78643	380.828	950.233
3	BFB1	BFB1.2_8_TRA-51	0.00131853	2.43e-06	0.282533	1.4e-05	511.387	19.5119	2.05643	0.914456	1.82891	415.84	985.715
3	BFB1	BFB1.2_9m_TRA-52	0.000706188	6.56e-07	0.282531	1.27e-05	503.586	24.5931	2.00817	0.989181	1.97836	412.006	973.674
3	BFB1	BFB1.2_9mn_TRA-53	0.00127609	4.28e-06	0.282575	1.33e-05	514.546	19.5185	3.60114	0.889145	1.77829	347.346	928.383
2	QM1	QM1.1-001_3598	0.000969756	6.11e-06	0.282596	1.49e-05	523.984	47.849	4.67973	1.56618	3.13236	308.692	891.785		6.52159
2	QM1	QM1.1-006_3601	0.00163144	4.41e-06	0.282757	4.76e-05	517.885	29.9475	10.0227	2.32196	4.64392	46.0552	684.92
2	QM1	QM1.1-010_3602	0.00107471	9.27e-06	0.28256	1.71e-05	542.135	59.1682	3.73462	1.88452	3.76905	369.903	944.08
2	QM1	QM1.1-014_3603	0.00134398	1.02e-05	0.282703	2.48e-05	531.655	36.0275	8.48532	1.64723	3.29446	136.156	754.687
2	QM1	QM1.1-017_3604	0.00120262	1.53e-05	0.282571	1.68e-05	591.355	57.9983	5.1403	1.83923	3.67845	353.459	932.348
2	QM1	QM1.2-001_3662	0.00136396	5.08e-06	0.282661	1.99e-05	535.354	40.7291	7.0851	1.57838	3.15675	205.141	812.057
2	QM1	QM1.2-002_3663	0.00164112	2.83e-06	0.282693	1.6e-05	525.36	34.8349	7.91317	1.30845	2.61689	153.131	773.48
2	QM1	QM1.2-003_3666	0.00163116	2.3e-06	0.282587	1.91e-05	538.666	32.1977	4.41252	1.36239	2.72478	331.547	920.69
2	QM1	QM1.2-005_3667	0.00148901	8.8e-06	0.282696	3.22e-05	526.406	34.4972	8.06657	1.8739	3.7478	148.748	767.415
2	QM1	QM1.2-006_3669	0.0019573	2.64e-05	0.28266	2.46e-05	542.326	36.8371	6.98963	1.62997	3.25994	210.497	825.909
2	QM1	QM1.2-011_3670	0.00126547	2.76e-06	0.282669	1.86e-05	531.748	33.6331	7.30775	1.38335	2.76671	192.139	799.759
3	QM1	QM1.3_1_TRA-65	0.00257162	2.73e-05	0.282665	1.61e-05	459.841	22.0955	5.21894	1.00986	2.01972	206.919	833.038
3	QM1	QM1.3_2_TRA-66	0.00111955	2.95e-06	0.282627	1.39e-05	540.1	27.5981	6.05354	1.08904	2.17808	260.246	853.894
3	QM1	QM1.3_3_TRA-67	0.00180167	1.6e-05	0.282656	1.43e-05	548.23	23.0068	6.99768	0.98324	1.96648	217.69	829.344
3	QM1	QM1.3_4_TRA-70	0.00278494	0.000105	0.28261	2.41e-05	552.024	17.3741	5.0925	1.1317	2.26339	304.011	916.298
3	QM1	QM1.3_5_TRA-71	0.00165275	1.95e-06	0.282623	1.5e-05	527.929	16.3408	5.4644	0.878425	1.75685	271.085	871.076
3	SAFT10	SAFT10_1_TRA-116	0.00279462	3.38e-06	0.282463	1.12e-05	556.057	23.1641	-0.00797997	0.870723	1.74145	556.445	1123.74		2.02787
3	SAFT10	SAFT10_10_TRA-129	0.00055593	7.02e-07	0.282538	1.26e-05	541.815	18.0998	3.16028	0.845183	1.69037	398.396	960.229
3	SAFT10	SAFT10_11_TRA-130	0.000559249	3.78e-07	0.282517	1.38e-05	528.677	18.971	2.10443	0.906939	1.81388	433.181	989.187
3	SAFT10	SAFT10_12_TRA-133	0.000628074	3.75e-07	0.282512	1.46e-05	534.801	24.1203	2.06287	1.04789	2.09578	441.01	996.661
3	SAFT10	SAFT10_13_TRA-134	0.00078169	3.59e-06	0.282532	1.63e-05	525.405	17.1953	2.51047	0.95138	1.90276	410.683	973.654
3	SAFT10	SAFT10_14_TRA-135	0.00219902	6.75e-06	0.282524	1.07e-05	592.877	16.0189	3.12341	0.70984	1.41968	443.865	1022.04
3	SAFT10	SAFT10_15_TRA-136	0.000696968	4.54e-06	0.282513	1.4e-05	531.763	20.5226	1.99287	0.943352	1.8867	440.961	997.592
3	SAFT10	SAFT10_16_TRA-137	0.00106923	2.21e-06	0.282506	1.28e-05	552.871	42.9211	2.0686	1.3847	2.76941	457.578	1016.68
3	SAFT10	SAFT10_17_TRA-140	0.00142547	3.36e-06	0.282479	1.36e-05	556.726	16.7299	1.07525	0.838636	1.67727	506.67	1062.45
3	SAFT10	SAFT10_18_TRA-141	0.000963019	4.09e-06	0.282547	1.62e-05	527.825	18.2666	3.01683	0.968779	1.93756	389.174	958.423
3	SAFT10	SAFT10_19_TRA-142	0.00074886	1.2e-06	0.282555	1.49e-05	528.557	18.1879	3.38412	0.925754	1.85151	374.019	942.743
3	SAFT10	SAFT10_2_TRA-119	0.00123051	3.61e-06	0.282545	1.14e-05	531.055	15.9696	2.91851	0.746264	1.49253	395.828	967.851
3	SAFT10	SAFT10_20_TRA-143	0.00122794	4.68e-06	0.282511	1.47e-05	528.179	27.221	1.64997	1.10555	2.2111	451.773	1014.15
3	SAFT10	SAFT10_21_TRA-144	0.000378145	1.66e-06	0.28252	1.59e-05	528.742	18.5185	2.29693	0.972621	1.94524	425.071	979.905
3	SAFT10	SAFT10_22_TRA-147	0.000514447	2.65e-07	0.282504	1.48e-05	530.647	16.9096	1.72823	0.89744	1.79488	452.345	1004.49
3	SAFT10	SAFT10_23_TRA-148	0.000694234	6.9e-06	0.282487	1.36e-05	531.047	24.412	1.06114	1.01291	2.02583	482.72	1032.24
3	SAFT10	SAFT10_24_TRA-149	0.000855501	8.8e-06	0.28254	1.64e-05	520.403	23.3001	2.65858	1.08379	2.16758	398.618	964.701
3	SAFT10	SAFT10_25_TRA-150	0.000967681	5.87e-06	0.282522	1.56e-05	532.994	17.4409	2.23208	0.928169	1.85634	430.44	992.716
3	SAFT10	SAFT10_26_TRA-151	0.000648444	2.23e-07	0.28253	1.32e-05	523.003	15.0573	2.40854	0.798502	1.597	413.384	973.997
3	SAFT10	SAFT10_27_TRA-154	0.00121102	1.07e-06	0.282514	1.54e-05	522.515	15.401	1.6467	0.877537	1.75507	446.29	1009.36
3	SAFT10	SAFT10_29_TRA-155	0.00233627	1.12e-05	0.282461	1.21e-05	570.526	17.856	0.385667	0.792767	1.58553	552.059	1113.24
3	SAFT10	SAFT10_3_TRA-120	0.000449722	9.78e-07	0.282512	1.26e-05	526.355	27.1605	1.92865	1.04673	2.09346	439.127	992.597
3	SAFT10	SAFT10_30_TRA-156	0.000530669	1.59e-06	0.282503	9.55e-06	527.056	12.307	1.59719	0.608736	1.21747	454.654	1006.64
3	SAFT10	SAFT10_32_TRA-157	0.00106537	1.24e-05	0.282484	1.3e-05	541.71	15.1221	1.06273	0.779723	1.55945	492.77	1045.8
3	SAFT10	SAFT10_33_TRA-158	0.000580342	8.88e-07	0.28254	1.35e-05	529.255	13.9359	2.93469	0.784658	1.56932	395.952	958.545
3	SAFT10	SAFT10_34_TRA-161	0.000569669	7.27e-07	0.2825	1.45e-05	528.497	13.3838	1.50201	0.808051	1.6161	460.333	1011.9
3	SAFT10	SAFT10_35_TRA-162	0.000842201	3.55e-06	0.2825	1.65e-05	533.926	14.0245	1.53571	0.888424	1.77685	463.66	1018.49
3	SAFT10	SAFT10_36_TRA-163	0.000626924	7.55e-07	0.282489	1.11e-05	529.284	14.3937	1.10625	0.709372	1.41874	479.003	1028.22
3	SAFT10	SAFT10_37_TRA-164	0.0012408	3.24e-06	0.28251	1.5e-05	533.34	20.2668	1.7428	0.966729	1.93346	452.608	1015.03
3	SAFT10	SAFT10_39_TRA-165	0.00173938	1.44e-05	0.28251	1.31e-05	529.226	31.1724	1.45031	1.11645	2.2329	460.994	1029.27
3	SAFT10	SAFT10_4_TRA-121	0.00155125	1.46e-05	0.282517	1.16e-05	550.449	19.0003	2.2433	0.806545	1.61309	445.539	1013.71
3	SAFT10	SAFT10_40_TRA-168	0.000489169	2.2e-06	0.282511	1.35e-05	521.408	14.0365	1.78071	0.786712	1.57342	440.772	994.515
3	SAFT10	SAFT10_41_TRA-169	0.000886453	4.1e-06	0.282508	1.46e-05	541.891	29.8131	1.97371	1.16543	2.33087	451.46	1008.99
3	SAFT10	SAFT10_42_TRA-170	0.0005088	5.12e-07	0.282542	1.81e-05	534.842	12.3832	3.13642	0.91418	1.82836	392.689	954.816
3	SAFT10	SAFT10_43_TRA-171	0.000689315	1.11e-06	0.282443	1.29e-05	530.435	11.837	-0.504835	0.716016	1.43203	553.408	1090.91
3	SAFT10	SAFT10_44_TRA-172	0.000536067	8.34e-07	0.282519	1.31e-05	526.458	13.9679	2.15918	0.771611	1.54322	428.539	985.003
3	SAFT10	SAFT10_45_TRA-175	0.000499621	2.72e-07	0.282519	1.48e-05	525.25	10.7862	2.13816	0.762198	1.5244	428.39	984.367
3	SAFT10	SAFT10_46_TRA-176	0.000670116	4.36e-07	0.282533	1.33e-05	525.225	13.1263	2.56316	0.759222	1.51844	408.49	970.24
3	SAFT10	SAFT10_48_TRA-177	0.000640933	3.11e-07	0.282508	1.51e-05	526.771	12.9206	1.73996	0.818756	1.63751	447.628	1002.34
3	SAFT10	SAFT10_49_TRA-178	0.000525742	1.22e-06	0.282497	1.27e-05	537.725	14.7261	1.60793	0.774069	1.54814	464.862	1015.06
3	SAFT10	SAFT10_5_TRA-122	0.00175277	2.47e-05	0.28251	1.31e-05	525.618	25.8264	1.37243	0.994992	1.98998	461.02	1029.49
3	SAFT10	SAFT10_50_TRA-179	0.000544806	2.09e-07	0.282524	1.22e-05	537.478	12.6824	2.55161	0.711818	1.42364	421.74	979.474
3	SAFT10	SAFT10_51_TRA-182	0.000599132	6.12e-07	0.282515	1.33e-05	532.943	13.5105	2.10655	0.768223	1.53645	437.244	993.125
3	SAFT10	SAFT10_52_TRA-183	0.000500834	1.65e-06	0.282513	1.37e-05	526.541	10.9533	1.95737	0.725957	1.45191	437.877	992.271
3	SAFT10	SAFT10_6_TRA-123	0.00127715	1.6e-05	0.282558	1.28e-05	546.705	67.0779	3.71789	1.88979	3.77958	374.186	950.619
3	SAFT10	SAFT10_7_TRA-126	0.000760046	2.27e-05	0.282453	1.07e-05	533.52	14.7143	-0.129315	0.684962	1.36992	539.418	1080.25
3	SAFT10	SAFT10_8_TRA-127	0.000606309	1.5e-06	0.282541	1.4e-05	522.591	16.1316	2.79999	0.850019	1.70004	395.296	958.369
3	SAFT10	SAFT10_9_TRA-128	0.00140616	3.84e-06	0.282544	1.63e-05	528.606	18.036	2.76849	0.962131	1.92426	399.631	973.593
2	SAFT8	SAFT8B-001_3554	0.0011328	7.99e-06	0.282409	4.68e-05	506.297	32.6504	-2.38424	2.35865	4.7173	616.242	1149.12		2.57939
2	SAFT8	SAFT8B-002_3555	0.00204477	4.66e-06	0.282375	5.47e-05	361.54	40.8688	-6.93959	2.79124	5.58248	691.117	1223.68
2	SAFT8	SAFT8B-004_3556	0.00236511	4.88e-06	0.282477	6.04e-05	524.496	29.1706	-0.0366488	2.74333	5.48667	526.253	1092.42
2	SAFT8	SAFT8B-005_3557	0.00220226	1.32e-05	0.282546	5.4e-05	529.711	29.2359	2.57939	2.51532	5.03064	406.508	991.314
2	SAFT8	SAFT8B-006_3558	0.00236057	1.05e-05	0.282441	4.6e-05	536.859	35.4876	-1.02702	2.36118	4.72236	586.076	1141.61
2	SAFT8	SAFT8B-007_3561	0.00378729	1.55e-05	0.282459	6.89e-05	544.729	32.3276	-0.738382	3.0715	6.14301	581.805	1159.96
2	SAFT8	SAFT8B-009_3562	0.00196968	4.35e-06	0.282422	5.94e-05	544.224	29.6055	-1.41539	2.72535	5.4507	611.193	1156.65
2	SAFT8	SAFT8B-010_3563	0.0036894	3.1e-06	0.282594	5.13e-05	553.759	31.5243	4.24309	2.44436	4.88873	340.942	961.655
2	SAFT8	SAFT8B-011_3564	0.00385954	1.02e-05	0.282486	5.54e-05	535.765	31.6402	0.00987437	2.58236	5.16473	535.268	1123.12
2	SAFT8	SAFT8B-023_3571	0.00331779	7.06e-06	0.282672	5.1e-05	515.752	28.6032	6.35837	2.37923	4.75847	200.202	840.24
2	SAFT8	SAFT8B-024_3572	0.00312297	6.23e-06	0.282558	5.63e-05	551.098	31.2413	3.12978	2.62503	5.25007	397.114	998.175
2	SAFT8	SAFT8B-032_3568	0.00716501	2.15e-05	0.282927	6.87e-05	545.44	34.2374	14.6074	3.02174	6.04348	-288.492	525.911
2	SAFT8	SAFT8B-033_3569	0.00280293	2.97e-06	0.282459	6.25e-05	540.874	30.4696	-0.479102	2.83749	5.67498	564.167	1130.21
3	SAFT8	SAFT8.2_1_TRA-106	0.00283907	2.93e-05	0.282463	1.8e-05	531.11	23.3341	-0.536827	1.09501	2.19002	557.245	1125.07
3	SAFT8	SAFT8.2_2_TRA-107	0.00623076	1.12e-05	0.282564	2.44e-05	557.858	17.3319	2.33493	1.1724	2.3448	429.986	1079.71
3	SAFT8	SAFT8.2_3_TRA-108	0.00427157	2.72e-05	0.282581	2.01e-05	534.372	12.2247	3.19231	0.931388	1.86278	371.09	996.265
3	SAFT8	SAFT8.2_4_TRA-109	0.00695661	1.62e-05	0.282603	2.54e-05	560.733	18.8542	3.4979	1.22268	2.44535	363.836	1041.11
3	SAFT8	SAFT8.2_5_TRA-112	0.00345853	7.7e-05	0.282624	2.26e-05	530.004	14.5707	4.89768	1.03784	2.07568	286.045	912.863
3	SAFT8	SAFT8.2_6_TRA-113	0.00365093	1.52e-05	0.282585	2.02e-05	537.909	16.978	3.62855	1.04371	2.08741	356.142	973.414
3	SAFT8	SAFT8.2_7_TRA-114	0.00299116	1.63e-05	0.282562	2.56e-05	539.689	28.4169	3.06869	1.47529	2.95057	389.33	989.657
3	SAFT8	SAFT8.2_8_TRA-115	0.00178041	1.19e-05	0.282543	2.86e-05	539.922	16.0868	2.84922	1.34578	2.69157	405.65	984.168
2	SHCR1	SHCR1.1-006_3611	0.00145021	1.02e-06	0.282647	1.65e-05	529.729	31.5541	6.40961	1.26138	2.52275	230.247	834.167		6.94959
2	SHCR1	SHCR1.1-009_3614	0.00145513	5.95e-06	0.282713	1.31e-05	535.444	31.2103	8.87087	1.13004	2.26008	120.502	743.528
2	SHCR1	SHCR1.1-019_3615	0.00112025	1.05e-05	0.282655	1.62e-05	574.563	43.9963	7.78935	1.52113	3.04226	214.446	815.97
2	SHCR1	SHCR1.2-004_3655	0.000665133	1.99e-06	0.28262	1.72e-05	559.69	31.3549	6.407	1.29799	2.59597	267.669	853.219
2	SHCR1	SHCR1.2-008_3657	0.000739826	5.8e-07	0.28265	1.42e-05	567.855	69.922	7.62435	2.03988	4.07976	219.436	814.3
2	SHCR1	SHCR1.2-009_3660	0.00112088	1.04e-05	0.282568	2.03e-05	535.444	31.2103	3.86669	1.38824	2.77647	356.832	933.929
3	SHCR1	SHCR1.3_1_TRA-85	0.00103899	2.41e-06	0.282645	1.34e-05	531.661	32.174	6.56094	1.17277	2.34554	228.983	826.764
3	SHCR1	SHCR1.3_11_TRA-98	0.000918354	2.04e-06	0.28267	1.35e-05	530.719	13.3284	7.43624	0.767562	1.53512	188.796	791.607
3	SHCR1	SHCR1.3_12_TRA-99	0.00148148	6.28e-06	0.282617	1.37e-05	536.24	26.6348	5.4868	1.05204	2.10409	279.764	875.591
3	SHCR1	SHCR1.3_13_TRA-100	0.00333623	1.79e-05	0.28266	1.25e-05	539.588	34.1203	6.42325	1.11919	2.23838	220.774	857.385
3	SHCR1	SHCR1.3_14_TRA-101	0.00166175	3.81e-06	0.282662	1.26e-05	533.137	17.8087	6.94959	0.82341	1.64682	206.214	817.643
3	SHCR1	SHCR1.3_15_TRA-102	0.00185751	4.86e-06	0.282652	1.58e-05	568.712	41.1875	7.29157	1.43013	2.86026	223.786	835.266
3	SHCR1	SHCR1.3_16_TRA-105	0.000675692	1.73e-06	0.282615	1.38e-05	537.35	16.5412	5.72038	0.851236	1.70247	276.495	860.703
3	SHCR1	SHCR1.3_2_TRA-86	0.00146648	4.26e-06	0.282672	1.46e-05	538.45	18.2271	7.50455	0.90524	1.81048	187.526	799.106
3	SHCR1	SHCR1.3_3_TRA-87	0.00292405	2.24e-05	0.282673	1.45e-05	542.08	59.5853	7.09297	1.71784	3.43568	194.68	828.937
3	SHCR1	SHCR1.3_4_TRA-88	0.000479234	1.97e-06	0.28268	1.31e-05	517.135	25.9899	7.64808	1.0375	2.07501	170.018	769.328
3	SHCR1	SHCR1.3_5_TRA-91	0.00182346	2.4e-05	0.282685	1.74e-05	532.297	15.2485	7.68525	0.922402	1.8448	168.797	789.356
3	SHCR1	SHCR1.3_6_TRA-92	0.00141919	1.03e-05	0.282654	1.31e-05	538.956	28.1174	6.8986	1.06086	2.12173	216.931	822.672
3	SHCR1	SHCR1.3_7_TRA-93	0.000938382	5.07e-06	0.282666	1.33e-05	531.412	25.919	7.3239	1.0329	2.06581	194.467	796.616
3	SHCR1	SHCR1.3_8_TRA-94	0.000665055	3.75e-06	0.282628	1.16e-05	518.813	22.8927	5.79435	0.911647	1.82329	254.559	842.333
3	SHCR1	SHCR1.3_9_TRA-95	0.00113092	1.77e-06	0.282585	1.32e-05	539.616	17.9221	4.55549	0.854867	1.70973	329.077	911.084
2	WMG1	WMG1.1-001_3607	0.00151443	4.08e-06	0.282691	1.79e-05	549.032	44.7944	8.38348	1.5918	3.18361	156.356	774.109		7.3698
2	WMG1	WMG1.1-002_3608	0.000710129	1.46e-06	0.282668	3.21e-05	543.514	60.1573	7.73773	2.45867	4.91735	190.037	789.452
2	WMG1	WMG1.1-005_3609	0.00293992	8.81e-06	0.282764	2.96e-05	551.4	33.6095	10.486	1.73053	3.46106	36.8481	699.855
2	WMG1	WMG1.2-007_3649	0.000805988	2.27e-06	0.282648	1.87e-05	537.497	39.6427	6.84899	1.52941	3.05881	223.781	818.906
2	WMG1	WMG1.2-009_3648	0.00269128	1.95e-05	0.282735	1.7e-05	582.007	42.5844	10.2043	1.46685	2.9337	85.7102	735.548
2	WMG1	WMG1.2-018_3653	0.0008464	6.19e-07	0.282681	1.41e-05	539.735	35.8716	8.05899	1.28426	2.56852	169.964	774.886
2	WMG1	WMG1.2-026_3654	0.000990397	1.04e-06	0.282655	1.63e-05	544.897	38.5525	7.21347	1.41688	2.83375	212.612	812.454
3	WMG1	WMG1.3_1_TRA-72	0.00127205	5e-06	0.282655	1.74e-05	517.076	17.1361	6.50002	0.982534	1.96507	214.956	818.743
3	WMG1	WMG1.3_10_TRA-81	0.00157984	1.87e-05	0.282672	1.65e-05	553.579	43.2643	7.76299	1.4959	2.99181	189.355	802.416
3	WMG1	WMG1.3_11_TRA-84	0.000542272	4.19e-06	0.282665	1.67e-05	532.454	25.4864	7.43011	1.15125	2.3025	194.724	790.803
3	WMG1	WMG1.3_2_TRA-73	0.00120972	2.11e-06	0.28255	1.6e-05	553.191	24.9422	3.58887	1.10485	2.2097	387.038	960.265
3	WMG1	WMG1.3_3_TRA-74	0.00161659	5.79e-06	0.282676	1.6e-05	526.367	11.3331	7.30949	0.804518	1.60904	182.897	797.667
3	WMG1	WMG1.3_5_TRA-77	0.00211128	2.65e-05	0.282662	1.9e-05	546.755	29.3886	7.10169	1.27113	2.54226	207.966	826.318
3	WMG1	WMG1.3_6_TRA-78	0.00350795	2.48e-05	0.28262	1.4e-05	561.409	12.5902	5.38783	0.730063	1.46013	292.71	919.156
3	WMG1	WMG1.3_8_TRA-79	0.00114925	3.97e-06	0.282635	1.73e-05	542.429	21.2893	6.40141	1.0713	2.14261	246.192	842.707
3	WMG1	WMG1.3_9_TRA-80	0.000931205	2.61e-06	0.282668	1.67e-05	548.296	15.8124	7.7446	0.934661	1.86932	192.137	794.575
